# Supplementary material for: Computer-assisted analysis of routine electroencephalogram to identify hidden biomarkers of epilepsy: protocol for a systematic review
Source: PubMed Central journal article supplement — BMJ Open. 2023 Jan 24;13(1):e066932. doi: 10.1136/bmjopen-2022-066932 (PMC9884857; doi:10.1136/bmjopen-2022-066932), 2023-01-24
Supplement: bmjopen-2022-066932.draft_revisions.pdf [file bmjopen-2022-066932.draft_revisions.pdf]

# BMJ Open

BMJ Open is committed to open peer review. As part of this commitment we make the peer review history of every article we publish publicly available.

When an article is published we post the peer reviewers' comments and the authors' responses online. We also post the versions of the paper that were used during peer review. These are the versions that the peer review comments apply to.

The versions of the paper that follow are the versions that were submitted during the peer review process. They are not the versions of record or the final published versions. They should not be cited or distributed as the published version of this manuscript.

BMJ Open is an open access journal and the full, final, typeset and author-corrected version of record of the manuscript is available on our site with no access controls, subscription charges or pay-per-view fees (<http://bmjopen.bmj.com>).

If you have any questions on BMJ Open's open peer review process please email [info.bmjopen@bmj.com](mailto:info.bmjopen@bmj.com)

# BMJ Open

## Computer-assisted analysis of routine EEG to identify hidden biomarkers of epilepsy: protocol for a systematic review

|                               |                                                                                                                                                                                                                                                                                                                                                                                                                                                                                                                                                                                                                                                                                                                                                                                                                                                                                                                                                                                                                                                                                                                                                                               |
|-------------------------------|-------------------------------------------------------------------------------------------------------------------------------------------------------------------------------------------------------------------------------------------------------------------------------------------------------------------------------------------------------------------------------------------------------------------------------------------------------------------------------------------------------------------------------------------------------------------------------------------------------------------------------------------------------------------------------------------------------------------------------------------------------------------------------------------------------------------------------------------------------------------------------------------------------------------------------------------------------------------------------------------------------------------------------------------------------------------------------------------------------------------------------------------------------------------------------|
| Journal:                      | <i>BMJ Open</i>                                                                                                                                                                                                                                                                                                                                                                                                                                                                                                                                                                                                                                                                                                                                                                                                                                                                                                                                                                                                                                                                                                                                                               |
| Manuscript ID                 | bmjopen-2022-066932                                                                                                                                                                                                                                                                                                                                                                                                                                                                                                                                                                                                                                                                                                                                                                                                                                                                                                                                                                                                                                                                                                                                                           |
| Article Type:                 | Protocol                                                                                                                                                                                                                                                                                                                                                                                                                                                                                                                                                                                                                                                                                                                                                                                                                                                                                                                                                                                                                                                                                                                                                                      |
| Date Submitted by the Author: | 26-Jul-2022                                                                                                                                                                                                                                                                                                                                                                                                                                                                                                                                                                                                                                                                                                                                                                                                                                                                                                                                                                                                                                                                                                                                                                   |
| Complete List of Authors:     | Lemoine, Émile; University of Montreal, Department of Neurosciences; Ecole Polytechnique de Montreal, Institute of Biomedical Engineering<br>Neves Briard, Joel; University of Montreal, Department of Neurosciences; University of Montreal Hospital Centre Research Centre<br>Rioux, Bastien; University of Montreal, Department of Neurosciences; University of Montreal Hospital Centre Research Centre<br>Podbielski, Renata; University of Montreal Hospital Centre Research Centre<br>Nauche, Bénédicte; University of Montreal Hospital Centre Research Centre<br>Toffa, Denahin; University of Montreal, Department of Neurosciences; University of Montreal Hospital Centre Research Centre<br>Keezer, Mark; University of Montreal, Department of Neurosciences; Stichting Epilepsie Instellingen Nederland<br>Lesage, Frederic; Ecole Polytechnique de Montreal, Institute of Biomedical Engineering<br>Nguyen, Dang ; University of Montreal, Department of Neurosciences; University of Montreal Hospital Centre Research Centre<br>Bou Assi, Elie; University of Montreal, Department of Neurosciences; University of Montreal Hospital Centre Research Centre |
| Keywords:                     | Epilepsy < NEUROLOGY, Neurophysiology < NEUROLOGY, NEUROLOGY                                                                                                                                                                                                                                                                                                                                                                                                                                                                                                                                                                                                                                                                                                                                                                                                                                                                                                                                                                                                                                                                                                                  |
|                               |                                                                                                                                                                                                                                                                                                                                                                                                                                                                                                                                                                                                                                                                                                                                                                                                                                                                                                                                                                                                                                                                                                                                                                               |

SCHOLARONE™  
Manuscripts

1  
2  
3  
4  
5 **Title: Computer-assisted analysis of routine EEG to identify hidden**  
6 **biomarkers of epilepsy: protocol for a systematic review**  
7  
8  
9

10  
11  
12  
13  
14  
15 **Authors**  
16

17 Émile Lemoine<sup>1, 2, 3</sup>

18 Joel Neves Briard<sup>1, 3</sup>

19 Bastien Rioux<sup>1, 3</sup>

20 Renata Podbielski<sup>3</sup>

21 Bénédicte Nauche<sup>3</sup>

22 Denahin Toffa<sup>1, 3</sup>

23 Mark Keezer<sup>1, 3-5</sup>

24 Frédéric Lesage<sup>2</sup>

25 Dang K. Nguyen<sup>1, 3</sup>

26 Elie Bou Assi<sup>1, 3</sup>

27 <sup>1</sup>Department of Neurosciences, University of Montreal, Canada

28 <sup>2</sup>Institute of biomedical engineering, Polytechnique Montreal, Canada

29 <sup>3</sup>University of Montreal Hospital Center's Research Center, Canada

30 <sup>4</sup>School of Public Health, University of Montreal, Canada

31 <sup>5</sup>Stichting Epilepsie Instellingen Nederland (SEIN), Heemstede, The Netherlands

32  
33  
34  
35  
36  
37  
38  
39  
40  
41  
42 **Corresponding author**  
43

44 Émile Lemoine, emile.lemoine@umontreal.ca

45 1051 rue Sanguinet, Montréal, Québec. H2X 3E4  
46  
47  
48  
49  
50  
51  
52  
53  
54  
55  
56  
57  
58  
59  
60

## 1 **Abstract**

2 **Introduction:** The diagnosis of epilepsy frequently relies on the visual interpretation of the  
3 electroencephalogram (EEG) by a neurologist. The hallmark of epilepsy on EEG is the interictal  
4 epileptiform discharge (IED). This marker lacks sensitivity: it is only captured in a small percentage of  
5 30-minute routine EEGs in patients with epilepsy. In the past three decades, there has been growing  
6 interest in the use of computational methods to analyze the EEG without relying on the detection of IEDs,  
7 but none have made it to the clinical practice. We aim to review the diagnostic accuracy of quantitative  
8 methods applied to ambulatory EEG analysis to guide the diagnosis and management of epilepsy.

9 **Methods and analysis:** The protocol complies with the recommendations for systematic reviews of  
10 diagnostic test accuracy by Cochrane. We will search MEDLINE, EMBASE, EBM reviews, IEEE  
11 Explore along with grey literature for articles, conference papers and conference abstracts published after  
12 1961. We will include observational studies that present a computational method to analyze the EEG for  
13 the diagnosis of epilepsy in adults or children without relying on the identification of IEDs or seizures.  
14 The reference standard is the diagnosis of epilepsy by a physician. We will report the estimated pooled  
15 sensitivity and specificity, and receiver operating characteristic area-under-the-curve (ROC AUC) for  
16 each marker. If possible, we will perform a meta-analysis of the sensitivity and specificity and ROC AUC  
17 for each individual marker. We will assess the risk of bias using an adapted QUADAS-2 tool. We will  
18 also describe the algorithms used for signal processing, feature extraction and predictive modeling, and  
19 comment on the reproducibility of the different studies.

20 **Ethics and dissemination:** Ethical approval was not required. Findings will be disseminated through  
21 peer-reviewed publication and presented at conferences related to this field.

22 **PROSPERO registration number:** CRD42022292261

### 23 **Strengths and limitations of this study:**

- 24 • This systematic review will be the first to critically evaluate the diagnostic accuracy of  
25 computational markers of epilepsy on routine EEG, with an emphasis on identifying the barriers  
26 towards clinical translation of this technology;
- 27 • The publication of this protocol ensures transparency, and evaluation of all studies during  
28 screening, selection, and data extraction by independent reviewers reduces the risk of bias in the  
29 selection and analysis of included studies;

- 1  
2  
3 31 • High heterogeneity in reporting standards and inclusion criteria is anticipated, possibly preventing  
4 32 the reliable estimation of diagnostic performance metrics;  
5  
6 33 • Our review will constitute a comprehensive reference of current practices in the automated  
7 34 processing and analysis of routine EEG for epilepsy.  
8  
9

10 35

11  
12  
13 36 **Keywords:** Epilepsy – Electroencephalogram – Machine Learning – Diagnosis – Computer-assisted –  
14 37 Biomarker

15  
16  
17 38 **Word count (abstract):** 290  
18  
19  
20  
21  
22  
23  
24  
25  
26  
27  
28  
29  
30  
31  
32  
33  
34  
35  
36  
37  
38  
39  
40  
41  
42  
43  
44  
45  
46  
47  
48  
49  
50  
51  
52  
53  
54  
55  
56  
57  
58  
59  
60

## 39 **Background**

40 Epilepsy is characterized by an enduring propensity towards epileptic seizures—transient neurological  
41 manifestations provoked by a state of abnormal and excessive neuronal activity in the brain<sup>1</sup>. Epilepsy  
42 affects over 65 millions of people worldwide, and 10% of the population will experience at least one  
43 seizure in their lifetime<sup>2,3</sup>. Epileptic seizures can lead to fractures, road accidents, isolation, anxiety,  
44 cognitive decline, and death<sup>4</sup>. In specialized-care settings, the first anti-seizure medication (ASM)  
45 achieves seizure freedom in approximately 47% of patients<sup>5</sup>. A prompt diagnosis is key in the prevention  
46 of epilepsy-related morbidity and mortality<sup>4</sup>.

47 A history of epileptic seizures or a high recurrence risk after a single seizure are the basis for the  
48 definition of epilepsy by the International League Against Epilepsy (ILAE)<sup>1</sup>. Ancillary tests are often  
49 needed to estimate seizure recurrence risk after a single seizure. These include the neurological  
50 examination, neuroimaging, and the electroencephalogram (EEG).

51 An EEG records the electrical activity of the brain. It is recommended that all patients who present with a  
52 first unprovoked seizure or with new diagnosis of epilepsy undergo an EEG<sup>6,7</sup>. The initial EEG is  
53 generally performed with electrodes applied to the patient's scalp (scalp EEG or *routine EEG*) for a  
54 duration of 20–40 minutes<sup>8</sup>. The EEG tracing is then interpreted visually by a neurologist, who attempts  
55 to identify interictal epileptiform discharges (IEDs; *aka* spikes). IEDs are brief (20–200ms) sharp  
56 discharges, clearly emerging from background oscillations, often negative in polarity and sometimes  
57 followed by a typical slow wave<sup>8</sup>. The presence of interictal spikes on the EEG is considered a hallmark  
58 of epilepsy, as it represents a strong predictor of seizure recurrence<sup>9,10</sup>. Furthermore, the identification of  
59 interictal spikes can help localize an epileptic focus that may be amenable to surgical resection, and can  
60 guide the withdrawal of ASMs in patients after a prolonged period of seizure freedom<sup>11,12</sup>.

61 The interictal spike has several limitations. It occurs very sporadically: in patients with epilepsy, only 29  
62 – 55% of routine EEGs will capture these transient abnormalities<sup>8</sup>. After a first unprovoked seizure in

1  
2  
3 63 adults, the sensitivity of a single routine EEG for detecting epileptiform abnormalities is only 17%<sup>9</sup>.  
4  
5 64 Furthermore, their identification is somewhat subjective: the percent agreement between EEG experts is  
6  
7 65 around 76%<sup>13</sup>. Many physiological transient discharges can be misinterpreted as epileptiform spikes. This  
8  
9 66 can lead to the erroneous diagnosis of epilepsy, with sometimes important consequences<sup>14,15</sup>. In patients  
10  
11 67 labelled with drug-resistant epilepsy, over 25% may have had an erroneous diagnosis as a result of both  
12  
13 68 inadequate history taking and misinterpretation of the EEG<sup>16</sup>. Despite the abundant information on brain  
14  
15 69 activity recorded by the EEG, no other interictal anomalies have been validated for use in clinical  
16  
17 70 settings<sup>1,17,18</sup>.

19  
20 71 Compared to other neuroimaging modalities, a scalp EEG is inexpensive, easy to acquire, and confers  
21  
22 72 functional information with high temporal resolution<sup>19,20</sup>. Moreover, great effort was put in the last decade  
23  
24 73 by the ILAE in standardizing the equipment, recording and storage of EEG data<sup>10,21</sup>. Decades of research  
25  
26 74 have demonstrated that the automated analysis of EEG can identify hidden differences between with  
27  
28 75 epilepsy and non-epileptic subjects in terms of connectivity<sup>22-24</sup>, signal predictability and complexity<sup>25,26</sup>,  
29  
30 76 spectral power<sup>27,28</sup>, and chaoticity<sup>29</sup>. Computational analysis of EEG holds the promise of extracting  
31  
32 77 information that is invisible to the naked eye of the human interpreter, in an objective and reproducible  
33  
34 78 manner. Discovering new, non-visible markers of epilepsy could increase the diagnostic yield of the EEG,  
35  
36 79 improve its accessibility, and reduce costs, especially in settings where the expertise of a fellowship-  
37  
38 80 trained neurophysiologist is unavailable<sup>18,30</sup>. In spite of this, none of the proposed non-visible markers of  
39  
40 81 epilepsy have made it into clinical practice<sup>10,31</sup>.

41  
42  
43 82 We will perform a systematic review of diagnostic test accuracy for automated methods of EEG analysis  
44  
45 83 to distinguish between patients with and without epilepsy without relying on the detection of spikes and  
46  
47 84 seizures. The questions that this review addresses are the following: What is the current evidence on the  
48  
49 85 performances of automatically extracted hidden markers of epilepsy for the diagnosis of epilepsy? And  
50  
51 86 what are the different algorithms that have been tested and how does their diagnostic accuracy compare?  
52  
53  
54  
55  
56  
57  
58  
59  
60

## 87 **Methods**

### 88 **Study design**

89 This will be a systematic review and meta-analysis following guidance from the Cochrane Diagnostic  
90 Test Accuracy group. We will report the results according to the PRISMA statement for diagnostic test  
91 accuracy (PRISMA-DTA)<sup>32</sup>.

### 92 **Study selection criteria**

#### 93 **Type of studies**

94 We will include all studies that describe a computed marker of epilepsy on routine (scalp) EEG which  
95 does not explicitly rely on the identification of interictal spikes or ictal activity (seizures). Studies must  
96 compare the EEG signal of individuals with and without epilepsy. We will include retrospective or  
97 prospective comparative studies enabling the assessment of diagnostic accuracy (cohort or case-control  
98 studies). We will exclude studies reporting data on non-human animals only, studies that include only  
99 intracranial or critical care EEG recordings, studies that do not include both individuals with and without  
100 epilepsy, and studies that are focused solely on seizure/spike detection or on short-term (<24h) seizure  
101 prediction. For studies that include multiple EEG types, we will only extract data that meet the inclusion  
102 criteria. We restricted the search to studies published after 1961 (the first use of digital EEG)<sup>33</sup>. There are  
103 no restrictions for language.

#### 104 **Population**

105 Our population of interest is individuals undergoing routine EEG in a clinical or research setting. A  
106 routine EEG is defined as a 20- to 60-minute scalp recording using the international 10–20 electrodes  
107 system, with or without prior sleep deprivation. There is no restriction for age groups or diagnoses.



## 108 **Reference standard**

109 We defined the reference standard as the diagnosis of epilepsy by a physician based on criteria specified  
110 by the authors (clinical or para-clinical). These criteria must accord with the definition of epilepsy by the  
111 ILAE: having had at least one seizure and long-term enduring predisposition to other unprovoked  
112 seizures<sup>1,34</sup>.

## 113 **Index test**

114 The index test is a characteristic or feature which is computationally extracted from the EEG signal to  
115 identify patients with epilepsy, without relying on detecting IEDs or seizures. These include measures of  
116 connectivity, entropy, chaoticity, and power spectrum density<sup>35</sup>. Also included are statistical models that  
117 combine several features or models that take as input the raw or processed EEG.

## 118 **Search strategy**

119 The search strategy (**Appendix 1**) was developed by two medical librarians specialized in systematic  
120 reviews (BN and RP), and peer-reviewed by a senior colleague. We will search MEDLINE (Ovid),  
121 EMBASE (Ovid), EBM reviews (Ovid), IEEE Explore along with grey literature for articles, conference  
122 papers and conference abstracts. We will use the Covidence platform (Melbourne, Australia) to manage  
123 our data for eligibility assessment, selection, and data collection. Two independent reviewers (EL, and  
124 either JNB or BR) will screen the records for eligibility using their title and abstract. Any item selected by  
125 either reviewer will proceed to the next phase. This process will be repeated on the screened items, this  
126 time by consulting the items' full text. A third, senior reviewer (EBA) will settle conflicts as necessary  
127 during the final selection.

## 128 **Data items**

129 Data collection will be performed using Covidence by two independent reviewers (EL and JNB/BR), and  
130 conflicts will be resolved by a third author (EBA). Authors of the primary study will be contacted if the

1  
2  
3 131 required data are not available in the original publication. Data collection will include the following  
4  
5 132 information:

- 6  
7 133 1. Title and authors of the study, country of sampling, year of publication;
- 8  
9 134 2. Study type: retrospective vs. prospective, design (cohort, case control);
- 10  
11 135 3. Study sample: exclusion and inclusion criteria, number of screened and included patients;
- 12  
13 136 4. Data collection:
  - 14  
15  
16 137 a. Number of patients, number of EEGs, duration of EEG recordings, use of activation  
17  
18 138 procedures (hyperventilation, photic stimulation, sleep deprivation), setting of recording  
19  
20 139 (hospitalized or ambulatory), whether the same protocol was used for all patients;
  - 21  
22 140 b. Number of electrodes, sampling frequency;
  - 23  
24 141 c. If public dataset: reference to the original dataset, dataset name, exclusion/inclusion  
25  
26 142 criteria used on the EEG segments from the dataset;
  - 27  
28 143 d. Participant characteristics: age, sex, comorbidities, number of ASM, age of first seizure;
- 29  
30 144 5. Reference standard: whether a predefined reference standard was used, definition of reference  
31  
32 145 standard, whether all patients underwent the same reference standard, time lapse between  
33  
34 146 reference standard and EEG;
- 35  
36 147 6. Index test:
  - 37  
38  
39 148 a. Pre-processing: artifact detection and removal (automated or manual), filtering method,  
40  
41 149 filtering frequencies, segmentation protocol (whole EEG vs. EEG segments, window  
42  
43 150 size, overlapping vs. non-overlapping segments, manual vs. automated selection of  
44  
45 151 segments), channel selection;
  - 46  
47 152 b. Feature extraction and selection: multi-channel vs. single channel, number of channels  
48  
49 153 selected, whether feature selection was performed, feature extraction algorithm, feature  
50  
51 154 selection method, whether feature selection was applied to data before vs. after excluding  
52  
53 155 testing data;

- 1  
2  
3 156 c. Classification: algorithm(s) used for classification, testing methodology (cross-validation  
4  
5 157 vs. held out testing set);  
6  
7 158 d. Metric used to report diagnostic performances: ROC AUC,  
8  
9 159 accuracy/sensitivity/specificity, F<sub>1</sub>-score, reporting of confidence intervals (CI);  
10  
11 160 7. Diagnostic performances: number of true positives, number of true negatives, number of false  
12  
13 161 positives, number of false negatives, reported accuracy, reported sensitivity, reported specificity,  
14  
15 162 reported F<sub>1</sub>-score, reported ROC AUC (if more than one index test is performed on the same  
16  
17 163 patient, we will only consider the first test);  
18  
19 164 8. Reproducibility: whether every data processing step is detailed, whether methods can be  
20  
21 165 reproduced easily, data availability, code availability, open-source computer libraries referenced.  
22  
23  
24

## 166 Risk of bias

167 The risk of bias of all included studies will be assessed through an adapted version of the QUADAS-2  
168 tool<sup>36</sup>. Risk of bias for each of the following four elements will be evaluated by two independent  
169 reviewers (EL and JNB/BR) as low, high, or unclear. Conflicts will be resolved by a third author (EBA).  
170 In addition, all publicly available datasets used by at least one of the included studies will be evaluated  
171 with the same tool. The following items will be assessed:

### 172 1. Patient selection

- 173 a. Is the population representative of clinical practice?  
174 b. Are inclusion and exclusion criteria identical for cases (patients with epilepsy) and  
175 controls?  
176 c. Are withdrawals explained and appropriate? If individual EEG segments were excluded,  
177 were the same criteria used for all segments?

### 178 2. Index test

- 179 a. Were the protocols used for recording the EEG identical in all patients, irrespective of the  
180 epilepsy diagnosis?

- 1  
2  
3 181 b. Was the index test validated on an independent sample of patients (patients which were  
4  
5 182 not used to identify the index test's threshold or train the learning algorithm)?  
6  
7 183 3. Reference standard  
8  
9 184 a. Are the criteria used for the diagnosis of epilepsy specified and acceptable (likely to  
10  
11 185 correctly classify the target condition)?  
12  
13 186 b. Was the reference standard assessment independent and blinded to the index test?  
14  
15  
16 187 4. Flow and timing  
17  
18 188 a. Did the whole sample undergo the reference standard?  
19  
20 189 b. Did the whole sample undergo the same reference standard?  
21  
22 190 c. Was the time lapse between reference standard and EEG acceptable?  
23  
24 191 d. Was the same data used in the index method available at the time of the reference  
25  
26 192 standard?  
27  
28 193 e. Were all EEGs included in the analysis?  
29  
30

### 31 194 **Data synthesis**

32  
33  
34 195 We will provide a table summarizing every published study included in the review, comparing the  
35  
36 196 studies' design, population, reference standard, dataset size, data processing methods, and diagnostic  
37  
38 197 accuracy. We will also provide a table summarizing the risk of bias for all items in the adapted  
39  
40 198 QUADAS-2 tool, comparing 1) every individual article included in the review, and 2) every public  
41  
42 199 dataset that is used in  $\geq 2$  studies.

43  
44  
45 200 We will describe the number of patients, number of EEGs, duration of EEGs, and the EEG-duration-per-  
46  
47 201 patient ratio across all included studies. We will report the pooled proportion of patients with focal vs.  
48  
49 202 generalized epilepsy, adult vs. children, structural vs. non-structural epilepsy, and with specific epilepsy  
50  
51 203 syndromes. For every publicly available dataset identified during the review, we will report the number of  
52  
53 204 studies that used that dataset in their work.  
54  
55  
56  
57  
58  
59

1  
2  
3 205 We will summarize the methods used by the different articles during the pipeline's algorithm (pre-  
4  
5 206 processing, feature extraction, feature selection, and classification algorithm), along with the proportion  
6  
7 207 of studies that used each method.  
8  
9

## 10 208 **Analyses**

11  
12 209 We will estimate the specificity and sensitivity for each study, using the Wilson score to compute 95%  
13  
14 210 CI. For studies with varying thresholds, we will estimate the ROC AUC and 95% CI.

15  
16  
17 211 If there are sufficient ( $\geq 5$ ) studies that report the number of true/false positives and true/false negatives,  
18  
19 212 we will estimate the pooled sensitivity and specificity of each individual marker using a hierarchical,  
20  
21 213 bivariate generalized linear mixed model<sup>37</sup>. This allows us to account for the correlation between  
22  
23 214 specificity and sensitivity in a single study. If  $\geq 5$  studies report these numbers for varying thresholds, we  
24  
25 215 will estimate the pooled ROC curve using the Rutter and Gatsonis HSROC model<sup>38</sup>. All analyses will be  
26  
27 216 implemented with the R statistical language. A  $p$ -value  $< 0.05$  will be considered statistically significant.  
28  
29 217 Given insufficient data for the pooled estimates, we will only describe the diagnostic performances  
30  
31 218 (sensitivity, specificity, ROC AUC) narratively. We will present the results of the analyses with forest  
32  
33 219 plots.

34  
35  
36 220 We will quantify heterogeneity using the variances of the logit specificity and sensitivity, as well as the  
37  
38 221 median odds ratio (median OR)<sup>39</sup>. The median OR is a measure of inter-study variance translated on the  
39  
40 222 OR scale. It corresponds to the increase in the odds of being true positive/negative in a patient/control  
41  
42 223 going from a study with lower sensitivity/specificity to a study with higher sensitivity/specificity. For  
43  
44 224 heterogeneity in the ROC plane, we will compute the area of the 95% prediction ellipse<sup>39</sup>. The median OR  
45  
46 225 and the area of the 95% prediction ellipse are easily obtained and interpreted, and take into account the  
47  
48 226 correlation between a single study's specificity and sensitivity in contrast to univariate methods like  
49  
50 227 Cochrane's  $Q$  and  $I^2$ <sup>37,40</sup>. We will perform subgroup analysis for the following variables: epilepsy type  
51  
52 228 (focal, generalized), epilepsy etiology (structural vs. non-structural), age groups (children ( $< 18$  y.o.),  
53  
54 229 adults ( $\geq 18$  y.o.)), epilepsy syndromes, extracted marker, and dataset used. We will assess heterogeneity  
55  
56  
57  
58  
59  
60

230 for all subgroup analyses. We will consider a study as belonging to a particular subgroup if  $\geq 80\%$  of the  
231 studied population belongs to that subgroup. Sensitivity analysis will be conducted for the main analyses  
232 by excluding studies with overall high/unclear risk of bias.

233 Some studies use multiple markers to classify patients with epilepsy from controls (*e.g.*, as input  
234 features for a machine learning algorithm). For each marker that is used in  $\geq 2$  of such studies, we will  
235 evaluate the number of studies for which these markers were identified as “important” (selected for the  
236 classification task or statistically significant in separating the two classes) and the ratio between the  
237 number of studies in which this marker was extracted vs. identified as important.

238 Reporting bias for sensitivity and specificity will be evaluated by visual inspection of funnel plots.

## 239 Discussion

240 The interictal EEG is key in the diagnosis of epilepsy, solely based on the visual identification of  
241 interictal spikes.<sup>41</sup> Despite years of research on computational biomarkers of epilepsy, only these spikes  
242 are currently used in clinical settings.<sup>1,17,18</sup> This review aims to systematically evaluate the diagnostic  
243 performances of hidden interictal markers of epilepsy on EEG, describe the data processing pipelines  
244 favored by the researchers to classify the EEG for epilepsy diagnosis, and identify the pitfalls that prevent  
245 clinical translation of these algorithms.

246 Algorithms have gained growing interest in medicine for their potential to assist diagnosis and guide  
247 clinical decision-making.<sup>42</sup> EEG analysis is well-suited for this application due to the complex nature of  
248 the EEG signal. Automated extraction of new epilepsy markers on routine EEG could lead to reduced rate  
249 of misdiagnosis, increased availability in areas without access to an expert neurophysiologist, and more  
250 efficient clinical trials. Research on automatic analysis of EEG data is thriving, in part assisted by the  
251 recent increase in computational capacities.<sup>43–50</sup> However, automatic analysis of EEG is not mentioned in  
252 any of the high-quality clinical practice guidelines systematically reviewed by the ILAE.<sup>17</sup>

1  
2  
3 253 In recent years, increased computational capacities have allowed the development of powerful algorithms  
4  
5 254 that can learn complex representations such as medical images and EEG signals.<sup>43,51,52</sup> A growing number  
6  
7 255 of algorithms have now been approved by the United States Food and Drug Administration for assisting  
8  
9 256 in the diagnosis of several diseases.<sup>53</sup> Recent systematic reviews have found that most of the studies on  
10  
11 257 automated diagnosis using artificial intelligence have high risk of bias, mostly due to patient selection  
12  
13 258 methodology and absence of validation on external data.<sup>54–56</sup> Systematic reviews on computer-based  
14  
15 259 clinical-decision support systems also highlight the need for more robust patient selection.<sup>57–62</sup>  
16  
17  
18 260 Translation of technology to clinical practice requires strong evidence based on high quality research.  
19  
20 261 This review is important because it will establish the potential of automatic analysis of EEG as a  
21  
22 262 diagnostic tool for epilepsy, and if evidence to support its use is lacking, it will identify the pitfalls that  
23  
24 263 need to be overcome in future research. Also, by systematically describing current practices that are used  
25  
26 264 by research groups, it will serve as a reference for new researchers in the field.  
27  
28  
29 265 We anticipate that diagnostic accuracy of automatic analysis of EEG for epilepsy will be hard to estimate  
30  
31 266 because of the high heterogeneity between the different dataset used and between the data processing  
32  
33 267 methodology. We also anticipate high risk of bias in many studies, because of the high volume of “proof-  
34  
35 268 of-concept” studies that emphasize computation performances and algorithm development over rigorous  
36  
37 269 diagnostic study methodology. In these cases, we hope to produce recommendations that will assist in  
38  
39 270 bridging the gap between the development of new automated markers and validation in appropriate  
40  
41 271 populations, for ultimate implementation into clinical practice.  
42  
43  
44  
45

## 46 272 **List of abbreviations**

47  
48 273 ASM: anti-seizure medication; CI: confidence interval; EEG: electroencephalogram; IED: interictal  
49  
50 274 epileptiform discharge; ILAE: International League Against Epilepsy; ROC AUC: receiver operating-  
51  
52 275 characteristic area-under-the-curve.  
53  
54  
55  
56  
57  
58  
59  
60

## 276 **Funding**

277 MRK and DKN report unrestricted educational grants from UCB and Eisai, and research grants for  
278 investigator-initiated studies from UCB and Eisai. Émile Lemoine is supported by a scholarship from the  
279 Canadian Institute of Health Research. Dang Nguyen is supported by the Canada Research Chairs  
280 Program, the Canadian Institutes of Health Research, and Natural Sciences and Engineering Research  
281 Council of Canada.

## 282 **Authors' contributions**

283 EL planned the study, drafted the protocol, reviewed the search strategy, and is the guarantor of the  
284 review. DT, FL, DKN, and EBA participated in the design of the study. JNB, BR, DT, MRK, FL, DKN,  
285 and EBA provided content expertise and critically reviewed the manuscript and the search strategy. BN  
286 and RP designed the search strategy. All authors read and approved the final manuscript.

## 287 **Competing interests**

288 None of the authors have any competing interest to declare.

## 289 **Patient and public involvement**

290 No patient involved.

## 291 **Data sharing statement**

292 Data collected for this study will be available upon reasonable request.

## 293 **References**

- 294 1. Fisher, R. S. *et al.* ILAE Official Report: A practical clinical definition of epilepsy. *Epilepsia* **55**,  
295 475–482 (2014).
- 296 2. Ngugi, A. K., Bottomley, C., Kleinschmidt, I., Sander, J. W. & Newton, C. R. Estimation of the  
297 burden of active and life-time epilepsy: a meta-analytic approach. *Epilepsia* **51**, 883–890 (2010).



- 1  
2  
3 298 3. Hauser, W. A. & Beghi, E. First seizure definitions and worldwide incidence and mortality. *Epilepsia*  
4  
5 299 **49 Suppl 1**, 8–12 (2008).  
6  
7 300 4. Devinsky, O., Spruill, T., Thurman, D. & Friedman, D. Recognizing and preventing epilepsy-related  
8  
9 301 mortality: A call for action. *Neurology* **86**, 779–786 (2016).  
10  
11 302 5. Kwan, P. & Brodie, M. J. Early identification of refractory epilepsy. *N Engl J Med* **342**, 314–319  
12  
13 303 (2000).  
14  
15 304 6. Krumholz, A. *et al.* Practice Parameter: evaluating an apparent unprovoked first seizure in adults (an  
16  
17 evidence-based review): report of the Quality Standards Subcommittee of the American Academy of  
18 305 Neurology and the American Epilepsy Society. *Neurology* **69**, 1996–2007 (2007).  
19  
20 306  
21  
22 307 7. Hirtz, D. *et al.* Practice parameter: evaluating a first nonfebrile seizure in children: report of the  
23  
24 308 quality standards subcommittee of the American Academy of Neurology, The Child Neurology  
25  
26 309 Society, and The American Epilepsy Society. *Neurology* **55**, 616–623 (2000).  
27  
28 310 8. Pillai, J. & Sperling, M. R. Interictal EEG and the Diagnosis of Epilepsy. *Epilepsia* **47**, 14–22 (2006).  
29  
30 311 9. Bouma, H. K., Labos, C., Gore, G. C., Wolfson, C. & Keezer, M. R. The diagnostic accuracy of  
31  
32 312 routine electroencephalography after a first unprovoked seizure. *European Journal of Neurology* **23**,  
33  
34 313 455–463 (2016).  
35  
36 314 10. Tatum, W. O. *et al.* Clinical utility of EEG in diagnosing and monitoring epilepsy in adults. *Clinical*  
37  
38 315 *Neurophysiology* **129**, 1056–1082 (2018).  
39  
40 316 11. Lamberink, H. J. *et al.* Individualised prediction model of seizure recurrence and long-term outcomes  
41  
42 317 after withdrawal of antiepileptic drugs in seizure-free patients: a systematic review and individual  
43  
44 318 participant data meta-analysis. *Lancet Neurol* **16**, 523–531 (2017).  
45  
46 319 12. West, S. *et al.* Surgery for epilepsy. *Cochrane Database of Systematic Reviews* (2019)  
47  
48 320 doi:10.1002/14651858.CD010541.pub3.  
49  
50 321 13. Jing, J. *et al.* Interrater Reliability of Experts in Identifying Interictal Epileptiform Discharges in  
51  
52 322 Electroencephalograms. *JAMA Neurology* **77**, 49–57 (2020).  
53  
54  
55  
56  
57  
58  
59  
60

- 1  
2  
3 323 14. Amin, U. & Benbadis, S. R. The Role of EEG in the Erroneous Diagnosis of Epilepsy. *J Clin*  
4  
5 324 *Neurophysiol* **36**, (2019).  
6  
7 325 15. Kang, J. Y. & Krauss, G. L. Normal Variants Are Commonly Overread as Interictal Epileptiform  
8  
9 326 Abnormalities. *J Clin Neurophysiol* **36**, 257–263 (2019).  
10  
11 327 16. Smith, D., Defalla, B. A. & Chadwick, D. W. The misdiagnosis of epilepsy and the management of  
12  
13 328 refractory epilepsy in a specialist clinic. *QJM* **92**, 15–23 (1999).  
14  
15 329 17. Sauro, K. M. *et al.* The current state of epilepsy guidelines: A systematic review. *Epilepsia* **57**, 13–23  
16  
17 330 (2016).  
18  
19 331 18. Engel Jr, J., Bragin, A. & Staba, R. Nonictal EEG biomarkers for diagnosis and treatment. *Epilepsia*  
20  
21 332 *Open* **3**, 120–126 (2018).  
22  
23 333 19. DellaBadia Jr, J., Bell, W. L., Keyes Jr, J. W., Mathews, V. P. & Glazier, S. S. Assessment and cost  
24  
25 334 comparison of sleep-deprived EEG, MRI and PET in the prediction of surgical treatment for epilepsy.  
26  
27 335 *Seizure* **11**, 303–309 (2002).  
28  
29 336 20. Abdelhady, S., Shokri, H., Fathy, M. & wahid el din, mona M. Evaluation of the direct costs of  
30  
31 337 epilepsy in a sample of Egyptian patients following up in Ain Shams University Hospital. *The*  
32  
33 338 *Egyptian Journal of Neurology, Psychiatry and Neurosurgery* **56**, 112 (2020).  
34  
35 339 21. Velis, D., Plouin, P., Gotman, J., Da Silva, F. L., & members of the ILAE DMC Subcommittee on  
36  
37 340 Neurophysiology. Recommendations Regarding the Requirements and Applications for Long-term  
38  
39 341 Recordings in Epilepsy. *Epilepsia* **48**, 379–384 (2007).  
40  
41 342 22. Schmidt, H. *et al.* A computational biomarker of idiopathic generalized epilepsy from resting state  
42  
43 343 EEG. *Epilepsia* **57**, e200–e204 (2016).  
44  
45 344 23. Lopes, M. A. *et al.* Revealing epilepsy type using a computational analysis of interictal EEG.  
46  
47 345 *Scientific Reports* **9**, 10169 (2019).  
48  
49 346 24. Verhoeven, T. *et al.* Automated diagnosis of temporal lobe epilepsy in the absence of interictal  
50  
51 347 spikes. *NeuroImage: Clinical* **17**, 10–15 (2018).  
52  
53  
54  
55  
56  
57  
58  
59  
60

- 1  
2  
3 348 25. Ouyang, C.-S., Yang, R.-C., Wu, R.-C., Chiang, C.-T. & Lin, L.-C. Determination of Antiepileptic  
4  
5 349 Drugs Withdrawal Through EEG Hjorth Parameter Analysis. *Int. J. Neur. Syst.* **30**, 2050036 (2020).  
6  
7 350 26. Zhang, J.-H. *et al.* Personalized prediction model for seizure-free epilepsy with levetiracetam therapy:  
8  
9 351 a retrospective data analysis using support vector machine. *Br J Clin Pharmacol* **84**, 2615–2624  
10  
11 352 (2018).  
12  
13 353 27. Oliva, J. T. & Rosa, J. L. G. Differentiation between Normal and Interictal EEG Using Multitaper  
14  
15 354 Spectral Classifiers. in *2018 International Joint Conference on Neural Networks (IJCNN)* 1–8  
16  
17 355 (2018). doi:10.1109/IJCNN.2018.8489503.  
18  
19  
20 356 28. Pegg, E. J., Taylor, J. R. & Mohanraj, R. Spectral power of interictal EEG in the diagnosis and  
21  
22 357 prognosis of idiopathic generalized epilepsies. *Epilepsy & Behavior* **112**, 107427 (2020).  
23  
24 358 29. Jacob, J. E., Sreelatha, V. V., Iype, T., Nair, G. K. & Yohannan, D. G. Diagnosis of epilepsy from  
25  
26 359 interictal EEGs based on chaotic and wavelet transformation. *Analog Integrated Circuits and Signal*  
27  
28 360 *Processing* **89**, 131–138 (2016).  
29  
30  
31 361 30. Wahl, B., Cossy-Gantner, A., Germann, S. & Schwalbe, N. R. Artificial intelligence (AI) and global  
32  
33 362 health: how can AI contribute to health in resource-poor settings? *BMJ Global Health* **3**, e000798  
34  
35 363 (2018).  
36  
37 364 31. Pitkänen, A. *et al.* Advances in the development of biomarkers for epilepsy. *The Lancet Neurology*  
38  
39 365 **15**, 843–856 (2016).  
40  
41 366 32. McInnes, M. D. F. *et al.* Preferred Reporting Items for a Systematic Review and Meta-analysis of  
42  
43 367 Diagnostic Test Accuracy Studies: The PRISMA-DTA Statement. *JAMA* **319**, 388–396 (2018).  
44  
45 368 33. November, J. Biomedical computing: Digitizing life in the United States. *Biomedical Computing:*  
46  
47 369 *Digitizing Life in the United States* 1–344 (2012).  
48  
49 370 34. Fisher, R. S. *et al.* Epileptic seizures and epilepsy: definitions proposed by the International League  
50  
51 371 Against Epilepsy (ILAE) and the International Bureau for Epilepsy (IBE). *Epilepsia* **46**, 470–472  
52  
53 372 (2005).  
54  
55  
56  
57  
58  
59  
60

- 1  
2  
3 373 35. Supriya, S., Siuly, S., Wang, H. & Zhang, Y. Automated epilepsy detection techniques from  
4  
5 374 electroencephalogram signals: a review study. *Health Information Science and Systems* **8**, 33 (2020).  
6  
7 375 36. Whiting, P. F. *et al.* QUADAS-2: a revised tool for the quality assessment of diagnostic accuracy  
8  
9 376 studies. *Ann Intern Med* **155**, 529–536 (2011).  
10  
11 377 37. Reitsma, J. B. *et al.* Bivariate analysis of sensitivity and specificity produces informative summary  
12  
13 378 measures in diagnostic reviews. *Journal of Clinical Epidemiology* **58**, 982–990 (2005).  
14  
15 379 38. Rutter, C. M. & Gatsonis, C. A. A hierarchical regression approach to meta-analysis of diagnostic test  
16  
17 380 accuracy evaluations. *Stat Med* **20**, 2865–2884 (2001).  
18  
19 381 39. Plana, M. N., Pérez, T. & Zamora, J. New measures improved the reporting of heterogeneity in  
20  
21 382 diagnostic test accuracy reviews: a metaepidemiological study. *Journal of Clinical Epidemiology*  
22  
23 383 **131**, 101–112 (2021).  
24  
25 384 40. Rücker, G., Schwarzer, G., Carpenter, J. R. & Schumacher, M. Undue reliance on I2 in assessing  
26  
27 385 heterogeneity may mislead. *BMC Medical Research Methodology* **8**, 79 (2008).  
28  
29 386 41. Smith, S. J. M. EEG in the diagnosis, classification, and management of patients with epilepsy. *J*  
30  
31 387 *Neurol Neurosurg Psychiatry* **76**, ii2–ii7 (2005).  
32  
33 388 42. Obermeyer, Z. & Emanuel, E. J. Predicting the Future - Big Data, Machine Learning, and Clinical  
34  
35 389 Medicine. *N Engl J Med* **375**, 1216–1219 (2016).  
36  
37 390 43. Roy, Y. *et al.* Deep learning-based electroencephalography analysis: a systematic review. *Journal of*  
38  
39 391 *Neural Engineering* **16**, 051001 (2019).  
40  
41 392 44. Craik, A., He, Y. & Contreras-Vidal, J. L. Deep learning for electroencephalogram (EEG)  
42  
43 393 classification tasks: a review. *J. Neural Eng.* **16**, 031001 (2019).  
44  
45 394 45. Rasheed, K. *et al.* Machine Learning for Predicting Epileptic Seizures Using EEG Signals: A  
46  
47 395 Review. *IEEE Rev. Biomed. Eng.* **14**, 139–155 (2020).  
48  
49 396 46. Gemein, L. A. W. *et al.* Machine-learning-based diagnostics of EEG pathology. *NeuroImage* **220**,  
50  
51 397 117021 (2020).  
52  
53  
54  
55  
56  
57  
58  
59  
60

- 1  
2  
3 398 47. Mesraoua, B. *et al.* Electroencephalography in epilepsy: look for what could be beyond the visual  
4  
5 399 inspection. *Neurological Sciences* **40**, 2287–2291 (2019).  
6  
7 400 48. van Diessen, E. *et al.* Brain Network Organization in Focal Epilepsy: A Systematic Review and  
8  
9 401 Meta-Analysis. *PLOS ONE* **9**, e114606 (2014).  
10  
11 402 49. Faiman, I., Smith, S., Hodsoll, J., Young, A. H. & Shotbolt, P. Resting-state EEG for the diagnosis of  
12  
13 403 idiopathic epilepsy and psychogenic nonepileptic seizures: A systematic review. *Epilepsy & Behavior*  
14  
15 404 **121**, 108047 (2021).  
16  
17 405 50. Pegg, E. J., Taylor, J. R., Keller, S. S. & Mohanraj, R. Interictal structural and functional connectivity  
18  
19 406 in idiopathic generalized epilepsy: A systematic review of graph theoretical studies. *Epilepsy &*  
20  
21 407 *Behavior* **106**, (2020).  
22  
23 408 51. Esteva, A. *et al.* A guide to deep learning in healthcare. *Nature Medicine* **25**, 24–29 (2019).  
24  
25 409 52. Litjens, G. *et al.* A survey on deep learning in medical image analysis. *Medical Image Analysis* **42**,  
26  
27 410 60–88 (2017).  
28  
29 411 53. FDA Cleared AI Algorithms. *American College of Radiology Data Science Institute*  
30  
31 412 <https://models.acrdsi.org>.  
32  
33 413 54. Aggarwal, R. *et al.* Diagnostic accuracy of deep learning in medical imaging: a systematic review  
34  
35 414 and meta-analysis. *npj Digital Medicine* **4**, 65 (2021).  
36  
37 415 55. Liu, X. *et al.* A comparison of deep learning performance against health-care professionals in  
38  
39 416 detecting diseases from medical imaging: a systematic review and meta-analysis. *The Lancet Digital*  
40  
41 417 *Health* **1**, e271–e297 (2019).  
42  
43 418 56. Nagendran, M. *et al.* Artificial intelligence versus clinicians: systematic review of design, reporting  
44  
45 419 standards, and claims of deep learning studies. *BMJ* vol. 368 m689 (2020).  
46  
47 420 57. Riches, N. *et al.* The Effectiveness of Electronic Differential Diagnoses (DDX) Generators: A  
48  
49 421 Systematic Review and Meta-Analysis. *PLoS One* **11**, e0148991 (2016).  
50  
51 422 58. Bright, T. J. *et al.* Effect of clinical decision-support systems: a systematic review. *Ann Intern Med*  
52  
53 423 **157**, 29–43 (2012).  
54  
55  
56  
57  
58  
59

- 1  
2  
3 424 59. Jaspers, M. W. M., Smeulers, M., Vermeulen, H. & Peute, L. W. Effects of clinical decision-support  
4  
5 425 systems on practitioner performance and patient outcomes: a synthesis of high-quality systematic  
6  
7 426 review findings. *J Am Med Inform Assoc* **18**, 327–334 (2011).  
8  
9 427 60. Garg, A. X. *et al.* Effects of computerized clinical decision support systems on practitioner  
10  
11 428 performance and patient outcomes: a systematic review. *JAMA* **293**, 1223–1238 (2005).  
12  
13 429 61. Varghese, J., Kleine, M., Gessner, S. I., Sandmann, S. & Dugas, M. Effects of computerized decision  
14  
15 430 support system implementations on patient outcomes in inpatient care: a systematic review. *J Am*  
16  
17 431 *Med Inform Assoc* **25**, 593–602 (2018).  
18  
19 432 62. Vasey, B. *et al.* Association of Clinician Diagnostic Performance With Machine Learning–Based  
20  
21 433 Decision Support Systems: A Systematic Review. *JAMA Network Open* **4**, e211276–e211276 (2021).  
22  
23  
24 434  
25  
26  
27  
28  
29  
30  
31  
32  
33  
34  
35  
36  
37  
38  
39  
40  
41  
42  
43  
44  
45  
46  
47  
48  
49  
50  
51  
52  
53  
54  
55  
56  
57  
58  
59  
60

## Appendix 1: Search strategy

### Medline [OVID]

Ovid MEDLINE(R) and Epub Ahead of Print, In-Process, In-Data-Review & Other Non-Indexed Citations, Daily and Versions(R) <1946 to December 13, 2021>

| #  | Searches                                                                                                                   | Results |
|----|----------------------------------------------------------------------------------------------------------------------------|---------|
| 1  | exp Electroencephalography/                                                                                                | 173584  |
| 2  | (EEG* or Electroencephalograph* or "electr* encephalograph*" or "brain wave*").tw,kf.                                      | 111352  |
| 3  | 1 or 2                                                                                                                     | 201652  |
| 4  | exp Epilepsy/                                                                                                              | 118716  |
| 5  | Epilep*.tw,kf.                                                                                                             | 152323  |
| 6  | (seizure* or convulsion* or infantile spasm*).tw,kf.                                                                       | 147989  |
| 7  | (BCECTS or BECTS).tw,kf.                                                                                                   | 346     |
| 8  | (panayiotopoulos adj2 syndrome*).tw,kf.                                                                                    | 166     |
| 9  | ((Nodding or dravet or doose or may white or fukhura) adj2 (disease* or syndrome*)).tw,kf.                                 | 1407    |
| 10 | (myoencephalopathy ragged red fiber* disease* or MERRF).tw,kf.                                                             | 530     |
| 11 | ((Lafora or Unverricht or Landau-Kleffner or Lennox Gastaut) adj2 (disease* or syndrome* or disorder* or seizure*)).tw,kf. | 2534    |
| 12 | or/4-11                                                                                                                    | 244612  |
| 13 | exp Algorithms/                                                                                                            | 375058  |
| 14 | Machine learning.tw,kf.                                                                                                    | 54804   |
| 15 | ((Deep or hierarchical) adj1 learning).tw,kf.                                                                              | 25347   |
| 16 | ((transfer* or representation* or network*) adj2 learning).tw,kf.                                                          | 7945    |
| 17 | ((artificial or machine or computer or computational) adj2 intelligence).tw,kf.                                            | 19275   |
| 18 | algorithm*.tw,kf.                                                                                                          | 299232  |
| 19 | ((data or binary or multiclass or multilabel) adj2 classification).tw,kf.                                                  | 4758    |

|    |                                                                                                                                |       |
|----|--------------------------------------------------------------------------------------------------------------------------------|-------|
| 20 | ((artificial or computational or computer* or convolutional or connectionist or mathematical) adj2 neur* network*).tw,kf.      | 28375 |
| 21 | exp Pattern Recognition, Automated/                                                                                            | 26085 |
| 22 | (Automat* adj2 pattern* adj2 recognition*).tw,kf.                                                                              | 155   |
| 23 | (Back* propagation* or backpropagation*).tw,kf.                                                                                | 4397  |
| 24 | exp Bayes Theorem/                                                                                                             | 40554 |
| 25 | (Bayes* adj2 (theorem or learning or analysis or approach* or forecast* or method* or prediction*)).tw,kf.                     | 21469 |
| 26 | (feature* adj2 (detecti* or extracti* or learning* or ranking* or selection*)).tw,kf.                                          | 21577 |
| 27 | (Fuzzy or neurofuzzy).tw,kf.                                                                                                   | 13240 |
| 28 | exp Markov chains/                                                                                                             | 15485 |
| 29 | (Markov adj2 (model* or chain\$1 or process*)).tw,kf.                                                                          | 21918 |
| 30 | K nearest neighbor*.tw,kf.                                                                                                     | 3529  |
| 31 | (Kernel\$1 adj2 (method* or algorithm* or approach or correlation or estim* or regression or model* or string or tree)).tw,kf. | 3950  |
| 32 | exp Knowledge discovery/                                                                                                       | 130   |
| 33 | (Knowledge adj2 discover*).tw,kf.                                                                                              | 1589  |
| 34 | exp Multifactor Dimensionality Reduction/                                                                                      | 226   |
| 35 | Dimensionality reduction*.tw,kf.                                                                                               | 3836  |
| 36 | (predicti* adj2 model*).tw,kf.                                                                                                 | 79862 |
| 37 | connectom*.tw,kf.                                                                                                              | 4980  |
| 38 | neur* decod*.tw,kf.                                                                                                            | 361   |
| 39 | (outlier* adj2 detection*).tw,kf.                                                                                              | 893   |
| 40 | Neural networks, computer/                                                                                                     | 35265 |
| 41 | (neural adj2 network*).tw,kf.                                                                                                  | 70371 |
| 42 | perceptron*.tw,kf.                                                                                                             | 3390  |
| 43 | radial basis function*.tw,kf.                                                                                                  | 2359  |
| 44 | random forest*.tw,kf.                                                                                                          | 13717 |



|    |                                                                                                        |       |
|----|--------------------------------------------------------------------------------------------------------|-------|
| 45 | recursive feature* elimination*.tw,kf.                                                                 | 688   |
| 46 | recursive partition*.tw,kf.                                                                            | 2380  |
| 47 | exp Support Vector Machine/                                                                            | 8553  |
| 48 | (vector* adj2 (machine* or classifi* or network* or regression)).tw,kf.                                | 22248 |
| 49 | support vector*.tw,kf.                                                                                 | 21483 |
| 50 | rough set*.tw,kf.                                                                                      | 397   |
| 51 | ((automat* or electron* or comput* or information or analytic*) adj2 (processing or reasoning)).tw,kf. | 38719 |
| 52 | (quantitative adj2 analys*).tw,kf.                                                                     | 90324 |
| 53 | (Peak* adj2 (alpha* or frequenc*)).tw,kf.                                                              | 5453  |
| 54 | Entrop*.tw,kf.                                                                                         | 45494 |
| 55 | Lyapunov exponent*.tw,kf.                                                                              | 2179  |
| 56 | Hjorth*.tw,kf.                                                                                         | 184   |
| 57 | Sub-band energ*.tw,kf.                                                                                 | 18    |
| 58 | exp fourier Analysis/                                                                                  | 17272 |
| 59 | (Fourier* or (cyclic adj2 (analys* or series or transform* or approach*)) or FFT).tw,kf.               | 87439 |
| 60 | (Hilbert* adj2 transform*).tw,kf.                                                                      | 1008  |
| 61 | (dimension* adj2 (fractal* or correlation*)).tw,kf.                                                    | 8106  |
| 62 | (Hurst adj2 exponent*).tw,kf.                                                                          | 575   |
| 63 | exp wavelet analysis/                                                                                  | 2541  |
| 64 | (Wavelet* adj2 (analysis or processing or transform*)).tw,kf.                                          | 7248  |
| 65 | phase locking value*.tw,kf.                                                                            | 311   |
| 66 | Fisher information*.tw,kf.                                                                             | 870   |
| 67 | Dynamic network*.tw,kf.                                                                                | 1839  |
| 68 | Principal component* analys*.tw,kf.                                                                    | 47819 |
| 69 | Independant component* analys*.tw,kf.                                                                  | 2     |
| 70 | Functional connectivit*.tw,kf.                                                                         | 22171 |

|    |                                                                                                                                                                                                                                                                                                                     |          |
|----|---------------------------------------------------------------------------------------------------------------------------------------------------------------------------------------------------------------------------------------------------------------------------------------------------------------------|----------|
| 71 | (gradient* boost* or Adaboost*).tw,kf.                                                                                                                                                                                                                                                                              | 3337     |
| 72 | (QEEG or Quantitative Electroencephalogra*).tw,kf.                                                                                                                                                                                                                                                                  | 1750     |
| 73 | (chaotic feature* or chaos).tw,kf.                                                                                                                                                                                                                                                                                  | 9755     |
| 74 | comput*.tw,kf.                                                                                                                                                                                                                                                                                                      | 958508   |
| 75 | quantitative.tw,kf.                                                                                                                                                                                                                                                                                                 | 689806   |
| 76 | or/13-75                                                                                                                                                                                                                                                                                                            | 2378446  |
| 77 | (sensitiv* or diagnos* or predict*).mp. or scor*.tw. or observ*.mp.                                                                                                                                                                                                                                                 | 11325259 |
| 78 | di.fs.                                                                                                                                                                                                                                                                                                              | 2760821  |
| 79 | or/77-78                                                                                                                                                                                                                                                                                                            | 11325259 |
| 80 | 3 and 12 and 76 and 79                                                                                                                                                                                                                                                                                              | 5990     |
| 81 | (Animals/ or Models, animal/ or Disease models, animal/) not Humans/                                                                                                                                                                                                                                                | 4900078  |
| 82 | ((animal or animals or canine* or cat or cats or dog or dogs or feline or hamster* or lamb or lambs or mice or monkey or monkeys or mouse or murine or pig or pigs or piglet* or porcine or primate* or rabbit* or rats or rat or rodent* or sheep* or veterinar*) not (human* or patient* or women or men)).tw,kf. | 3315730  |
| 83 | 81 or 82                                                                                                                                                                                                                                                                                                            | 5542727  |
| 84 | 80 not 83                                                                                                                                                                                                                                                                                                           | 5627     |
| 85 | limit 84 to yr="1961 -Current"                                                                                                                                                                                                                                                                                      | 5627     |

## EMBASE [OVID]

Embase <1974 to 2021 December 13>

| # | Searches                                                                              | Results |
|---|---------------------------------------------------------------------------------------|---------|
| 1 | exp electroencephalography/                                                           | 124495  |
| 2 | (EEG* or Electroencephalograph* or "electr* encephalograph*" or "brain wave*").tw,kf. | 146325  |
| 3 | 1 or 2                                                                                | 206929  |
| 4 | exp epilepsy/                                                                         | 251058  |
| 5 | Epilep*.tw,kf.                                                                        | 214171  |
| 6 | (seizure* or convulsion* or infantile spasm*).tw,kf.                                  | 216888  |
| 7 | (BCECTS or BECTS).tw,kf.                                                              | 509     |

|    |                                                                                                                              |        |
|----|------------------------------------------------------------------------------------------------------------------------------|--------|
| 8  | (panayiotopoulos adj2 syndrome*).tw,kf.                                                                                      | 249    |
| 9  | ((Nodding or dravet or doose or may white or fukhura) adj2 (disease* or syndrome*)).tw,kf.                                   | 2324   |
| 10 | (myoencephalopathy ragged red fiber* disease* or MERRF).tw,kf.                                                               | 711    |
| 11 | ((Lafora or Unverricht or Landau-Kleffner or Lennox Gastaut) adj2 (disease* or syndrome* or disorder* or seizure*)).tw,kf.   | 3984   |
| 12 | or/4-11                                                                                                                      | 371364 |
| 13 | Machine learning/                                                                                                            | 49774  |
| 14 | Machine learning.tw,kf.                                                                                                      | 63858  |
| 15 | ((Deep or hierarchical) adj1 learning).tw,kf.                                                                                | 28566  |
| 16 | exp network learning/                                                                                                        | 886    |
| 17 | ((transfer* or representation* or network*) adj2 learning).tw,kf.                                                            | 8790   |
| 18 | exp artificial intelligence/                                                                                                 | 55153  |
| 19 | ((artificial or machine or computer or computational) adj2 intelligence).tw,kf.                                              | 23056  |
| 20 | exp algorithm/                                                                                                               | 465121 |
| 21 | algorithm*.tw,kf.                                                                                                            | 381089 |
| 22 | ((data or binary or multiclass or multilabel) adj2 classification).tw,kf.                                                    | 6087   |
| 23 | exp artificial neural network/                                                                                               | 62826  |
| 24 | ((artificial or computational or computer* or convolutional or connectionist or mathematical) adj2 neur* network*).tw,kf.    | 33889  |
| 25 | exp pattern recognition/ or exp automated pattern recognition/                                                               | 68427  |
| 26 | (Automat* adj2 pattern* adj2 recognition*).tw,kf.                                                                            | 199    |
| 27 | exp back propagation/                                                                                                        | 2553   |
| 28 | (Back* propagation* or backpropagation*).tw,kf.                                                                              | 5107   |
| 29 | exp Bayesian learning/                                                                                                       | 4303   |
| 30 | (Bayes* adj2 (theorem or learning or analysis or approach* or forecast* or method* or prediction*)).tw,kf.                   | 24116  |
| 31 | exp Feature detection/ or exp feature extraction/ or exp feature learning/ or exp feature ranking/ or exp feature selection/ | 31030  |

|    |                                                                                                                                |        |
|----|--------------------------------------------------------------------------------------------------------------------------------|--------|
| 32 | ((feature* or representation) adj2 (detecti* or extracti* or learning* or ranking* or selection*)).tw,kf.                      | 28097  |
| 33 | exp fuzzy system/                                                                                                              | 4077   |
| 34 | (fuzzy or neurofuzzy).tw,kf.                                                                                                   | 16138  |
| 35 | exp Markov chain/ or exp Markov state model/                                                                                   | 12093  |
| 36 | (Markov adj2 (model* or chain\$1 or process*)).tw,kf.                                                                          | 29000  |
| 37 | exp k nearest neighbor/                                                                                                        | 4553   |
| 38 | K nearest neighbor*.tw,kf.                                                                                                     | 4260   |
| 39 | kernel method/                                                                                                                 | 6720   |
| 40 | (Kernel\$1 adj2 (method* or algorithm* or approach or correlation or estim* or regression or model* or string or tree)).tw,kf. | 4389   |
| 41 | exp Knowledge discovery/                                                                                                       | 727    |
| 42 | (Knowledge adj2 discover*).tw,kf.                                                                                              | 1804   |
| 43 | exp multifactor dimensionality reduction/                                                                                      | 864    |
| 44 | Dimension* reduction*.tw,kf.                                                                                                   | 7086   |
| 45 | (predicti* adj2 model*).tw,kf.                                                                                                 | 105404 |
| 46 | connectom*.tw,kf.                                                                                                              | 6225   |
| 47 | neur* decod*.tw,kf.                                                                                                            | 433    |
| 48 | exp Outlier detection/                                                                                                         | 470    |
| 49 | (outlier* adj2 detection*).tw,kf.                                                                                              | 1010   |
| 50 | exp artificial neural network/                                                                                                 | 62826  |
| 51 | exp Perceptron/                                                                                                                | 2478   |
| 52 | perceptron*.tw,kf.                                                                                                             | 3962   |
| 53 | (neural adj2 network*).tw,kf.                                                                                                  | 84786  |
| 54 | exp radial basis function/                                                                                                     | 942    |
| 55 | radial bas* function*.tw,kf.                                                                                                   | 2927   |
| 56 | exp random forest/                                                                                                             | 14358  |
| 57 | (random adj2 forest*).tw,kf.                                                                                                   | 17752  |

|    |                                                                                                        |        |
|----|--------------------------------------------------------------------------------------------------------|--------|
| 58 | exp recursive feature elimination/                                                                     | 393    |
| 59 | recursive feature* elimination*.tw,kf.                                                                 | 860    |
| 60 | exp recursive partitioning/                                                                            | 462    |
| 61 | recursive partition*.tw,kf.                                                                            | 3567   |
| 62 | exp relevance vector machine/ or exp support vector machine/                                           | 28522  |
| 63 | (vector* adj2 (machine* or classifi* or network* or regression)).tw,kf.                                | 27021  |
| 64 | support vector*.tw,kf.                                                                                 | 26266  |
| 65 | exp rough set/                                                                                         | 248    |
| 66 | rough set*.tw,kf.                                                                                      | 531    |
| 67 | exp online analytical processing/                                                                      | 187    |
| 68 | ((automat* or electron* or comput* or information or analytic*) adj2 (processing or reasoning)).tw,kf. | 44254  |
| 69 | Quantitative analysis/                                                                                 | 367570 |
| 70 | (quantitative adj2 analys*).tw,kf.                                                                     | 113093 |
| 71 | (Peak* adj2 (alpha* or frequenc*)).tw,kf.                                                              | 6315   |
| 72 | Entrop*.tw,kf.                                                                                         | 43483  |
| 73 | Lyapunov exponent*.tw,kf.                                                                              | 1600   |
| 74 | Hjorth*.tw,kf.                                                                                         | 264    |
| 75 | Sub-band energ*.tw,kf.                                                                                 | 23     |
| 76 | exp Fourier analysis/                                                                                  | 10056  |
| 77 | (Fourier* or (cyclic adj2 (analys* or series or transform* or approach*)) or FFT).tw,kf.               | 89584  |
| 78 | Hilbert transform/                                                                                     | 183    |
| 79 | (Hilbert* adj2 transform*).tw,kf.                                                                      | 1253   |
| 80 | (dimension* adj2 (fractal* or correlation*)).tw,kf.                                                    | 8947   |
| 81 | (Hurst adj2 exponent*).tw,kf.                                                                          | 555    |
| 82 | exp wavelet transform/                                                                                 | 2217   |
| 83 | (Wavelet* adj2 (analysis or processing or transform*)).tw,kf.                                          | 9182   |

|     |                                                                                                                                                                                                                                                                                             |          |
|-----|---------------------------------------------------------------------------------------------------------------------------------------------------------------------------------------------------------------------------------------------------------------------------------------------|----------|
| 84  | phase locking value*.tw,kf.                                                                                                                                                                                                                                                                 | 425      |
| 85  | Fisher information*.tw,kf.                                                                                                                                                                                                                                                                  | 746      |
| 86  | Dynamic network*.tw,kf.                                                                                                                                                                                                                                                                     | 1972     |
| 87  | Principal component* analys*.tw,kf.                                                                                                                                                                                                                                                         | 58526    |
| 88  | Independent component* analys*.tw,kf.                                                                                                                                                                                                                                                       | 7493     |
| 89  | Functional connectivity/                                                                                                                                                                                                                                                                    | 21903    |
| 90  | Functional connectivit*.tw,kf.                                                                                                                                                                                                                                                              | 30389    |
| 91  | (gradient* boost* or Adaboost*).tw,kf.                                                                                                                                                                                                                                                      | 4097     |
| 92  | (QEEG or Quantitative Electroencephalogra*).tw,kf.                                                                                                                                                                                                                                          | 2861     |
| 93  | (chaotic feature* or chaos).tw,kf.                                                                                                                                                                                                                                                          | 8412     |
| 94  | comput*.tw,kf.                                                                                                                                                                                                                                                                              | 1156500  |
| 95  | quantitative.tw,kf.                                                                                                                                                                                                                                                                         | 852081   |
| 96  | or/13-95                                                                                                                                                                                                                                                                                    | 2994032  |
| 97  | (sensitiv* or diagnos* or predict*).mp. or scor*.tw. or observ*.mp.                                                                                                                                                                                                                         | 14413096 |
| 98  | di.fs.                                                                                                                                                                                                                                                                                      | 3343316  |
| 99  | or/97-98                                                                                                                                                                                                                                                                                    | 14413096 |
| 100 | 3 and 12 and 96 and 99                                                                                                                                                                                                                                                                      | 8362     |
| 101 | (exp animal/ or animal experiment/ or nonhuman/) not (exp human/ or human experiment/)                                                                                                                                                                                                      | 6801969  |
| 102 | (animal or animals or canine* or dog or dogs or feline or hamster* or lamb or lambs or mice or monkey ormonkeys or mouse or murine or pig or pigs or piglet* or porcine or primate* or rabbit* or rats or rat or rodent* or sheep* or veterinar*).ti,kw,dq,jx. not (human* or patient*).mp. | 2062187  |
| 103 | 101 or 102                                                                                                                                                                                                                                                                                  | 6872024  |
| 104 | 100 not 103                                                                                                                                                                                                                                                                                 | 7906     |
| 105 | limit 104 to yr="1961 -Current"                                                                                                                                                                                                                                                             | 7890     |
| 106 | limit 105 to embase                                                                                                                                                                                                                                                                         | 5134     |

## EBM Reviews [OVID]

All EBM Reviews - Cochrane DSR, ACP Journal Club, DARE, CCA, CCTR, CMR, HTA, and NHSEED  
<executed on December 14>

| #  | Searches                                                                                                                      | Results |
|----|-------------------------------------------------------------------------------------------------------------------------------|---------|
| 1  | (EEG* or Electroencephalograph* or "electr* encephalograph*" or "brain wave*").tw,kw,sh.                                      | 12245   |
| 2  | Epilep*.tw,kw,sh.                                                                                                             | 10099   |
| 3  | (seizure* or convulsion* or infantile spasm*).tw,kw,sh.                                                                       | 11675   |
| 4  | (BCECTS or BECTS).tw,kw,sh.                                                                                                   | 31      |
| 5  | (panayiotopoulos adj2 syndrome*).tw,kw,sh.                                                                                    | 5       |
| 6  | ((Nodding or dravet or doose or may white or fukhura) adj2 (disease* or syndrome*)).tw,kw,sh.                                 | 413     |
| 7  | (myoencephalopathy ragged red fiber* disease* or MERRF).tw,kw,sh.                                                             | 5       |
| 8  | ((Lafora or Unverricht or Landau-Kleffner or Lennox Gastaut) adj2 (disease* or syndrome* or disorder* or seizure*)).tw,kw,sh. | 339     |
| 9  | or/2-8                                                                                                                        | 16595   |
| 10 | algorithm*.tw,kw.                                                                                                             | 16401   |
| 11 | Machine learning.tw,kw,sh.                                                                                                    | 1918    |
| 12 | ((Deep or hierarchical) adj1 learning).tw,kw,sh.                                                                              | 708     |
| 13 | ((transfer* or representation* or network*) adj2 learning).tw,kw,sh.                                                          | 691     |
| 14 | ((artificial or machine or computer or computational) adj2 intelligence).tw,kw,sh.                                            | 827     |
| 15 | algorithm*.tw,kw,sh.                                                                                                          | 18549   |
| 16 | ((data or binary or multiclass or multilabel) adj2 classification).tw,kw,sh.                                                  | 335     |
| 17 | ((artificial or computational or computer* or connectionist or convolutional or mathematical) adj2 neur* network*).tw,kw,sh.  | 782     |
| 18 | (Automat* adj2 pattern* adj2 recognition*).tw,kw,sh.                                                                          | 15      |
| 19 | (Back* propagation* or backpropagation*).tw,kw,sh.                                                                            | 66      |
| 20 | (Bayes* adj2 (theorem or learning or analysis or approach* or forecast* or method* or prediction*)).tw,kw,sh.                 | 1841    |
| 21 | (feature* adj2 (detecti* or extracti* or learning* or ranking* or selection*)).tw,kw,sh.                                      | 607     |

|    |                                                                                                                                   |      |
|----|-----------------------------------------------------------------------------------------------------------------------------------|------|
| 22 | (fuzzy or neurofuzzy).tw,kw,sh.                                                                                                   | 197  |
| 23 | (Markov adj2 (model* or chain\$1 or process*)).tw,kw,sh.                                                                          | 4373 |
| 24 | K nearest neighbor*.tw,kw,sh.                                                                                                     | 73   |
| 25 | (Kernel\$1 adj2 (method* or algorithm* or approach or correlation or estim* or regression or model* or string or tree)).tw,kw,sh. | 90   |
| 26 | (Knowledge adj2 discover*).tw,kw,sh.                                                                                              | 26   |
| 27 | Dimensionality reduction*.tw,kw,sh.                                                                                               | 73   |
| 28 | (predicti* adj2 model*).tw,kw,sh.                                                                                                 | 5378 |
| 29 | connectom*.tw,kw,sh.                                                                                                              | 308  |
| 30 | neur* decod*.tw,kw,sh.                                                                                                            | 2    |
| 31 | (outlier* adj2 detection*).tw,kw,sh.                                                                                              | 14   |
| 32 | perceptron*.tw,kw,sh.                                                                                                             | 76   |
| 33 | (neural adj2 network*).tw,kw,sh.                                                                                                  | 1672 |
| 34 | radial basis function*.tw,kw,sh.                                                                                                  | 39   |
| 35 | random forest*.tw,kw,sh.                                                                                                          | 615  |
| 36 | recursive feature* elimination*.tw,kw,sh.                                                                                         | 30   |
| 37 | recursive partition*.tw,kw,sh.                                                                                                    | 282  |
| 38 | (vector* adj2 (machine* or classifi* or network* or regression)).tw,kw,sh.                                                        | 555  |
| 39 | support vector*.tw,kw,sh.                                                                                                         | 544  |
| 40 | rough set*.tw,kw,sh.                                                                                                              | 3    |
| 41 | ((automat* or electron* or comput* or information or analytic*) adj2 (processing or reasoning)).tw,kw,sh.                         | 7510 |
| 42 | (quantitative adj2 analys*).tw,kw,sh.                                                                                             | 8960 |
| 43 | (Peak* adj2 (alpha* or frequenc*)).tw,kw,sh.                                                                                      | 357  |
| 44 | Entrop*.tw,kw,sh.                                                                                                                 | 951  |
| 45 | Lyapunov exponent*.tw,kw,sh.                                                                                                      | 37   |
| 46 | Hjorth*.tw,kw,sh.                                                                                                                 | 29   |
| 47 | Sub-band energ*.tw,kw,sh.                                                                                                         | 0    |



|    |                                                                                                                                                                                                                                                                                                                        |        |
|----|------------------------------------------------------------------------------------------------------------------------------------------------------------------------------------------------------------------------------------------------------------------------------------------------------------------------|--------|
| 48 | (Fourier* or (cyclic adj2 (analys* or series or transform* or approach*)) or FFT).tw,kw,sh.                                                                                                                                                                                                                            | 1043   |
| 49 | (Hilbert* adj2 transform*).tw,kw,sh.                                                                                                                                                                                                                                                                                   | 19     |
| 50 | (dimension* adj2 (fractal* or correlation*)).tw,kw,sh.                                                                                                                                                                                                                                                                 | 184    |
| 51 | (Hurst adj2 exponent*).tw,kw,sh.                                                                                                                                                                                                                                                                                       | 14     |
| 52 | (Wavelet* adj2 (analysis or processing or transform*)).tw,kw,sh.                                                                                                                                                                                                                                                       | 126    |
| 53 | phase locking value*.tw,kw,sh.                                                                                                                                                                                                                                                                                         | 11     |
| 54 | Fisher information*.tw,kw,sh.                                                                                                                                                                                                                                                                                          | 7      |
| 55 | Dynamic network*.tw,kw,sh.                                                                                                                                                                                                                                                                                             | 12     |
| 56 | Principal component* analys*.tw,kw,sh.                                                                                                                                                                                                                                                                                 | 1207   |
| 57 | Independant component* analys*.tw,kw,sh.                                                                                                                                                                                                                                                                               | 0      |
| 58 | Functional connectivit*.tw,kw,sh.                                                                                                                                                                                                                                                                                      | 2220   |
| 59 | (gradient* boost* or Adaboost*).tw,kw,sh.                                                                                                                                                                                                                                                                              | 168    |
| 60 | (QEEG or Quantitative Electroencephalogra*).tw,kw,sh.                                                                                                                                                                                                                                                                  | 448    |
| 61 | (chaotic feature* or chaos).tw,kw,sh.                                                                                                                                                                                                                                                                                  | 141    |
| 62 | comput*.tw,kw,sh.                                                                                                                                                                                                                                                                                                      | 80820  |
| 63 | quantitative.tw,kw,sh.                                                                                                                                                                                                                                                                                                 | 33706  |
| 64 | or/10-63                                                                                                                                                                                                                                                                                                               | 145496 |
| 65 | (sensitiv* or diagnos* or predict*).mp. or scor*.tw. or observ*.mp.                                                                                                                                                                                                                                                    | 810011 |
| 66 | di.tw,kw,sh.                                                                                                                                                                                                                                                                                                           | 17162  |
| 67 | 65 or 66                                                                                                                                                                                                                                                                                                               | 811399 |
| 68 | 1 and 9 and 64 and 67                                                                                                                                                                                                                                                                                                  | 350    |
| 69 | ((animal or animals or canine* or cat or cats or dog or dogs or feline or hamster* or lamb or lambs or mice or monkey or monkeys or mouse or murine or pig or pigs or piglet* or porcine or primate* or rabbit* or rats or rat or rodent* or sheep* or veterinar*) not (human* or patient* or women or men)).tw,kw,sh. | 5147   |
| 70 | 68 not 69                                                                                                                                                                                                                                                                                                              | 346    |
| 71 | limit 70 to yr="1961 -Current" [Limit not valid in DARE; records were retained]                                                                                                                                                                                                                                        | 321    |
| 72 | remove duplicates from 71                                                                                                                                                                                                                                                                                              | 315    |

## IEEE Xplore

<executed on December 14>

|                                                                                                                                                                                                                                                                                                                                                                                                                                                                                                                                                                                                                                                                                                                                                                                                                                                                                                                                                                                                                                                                                                                                                                                                                                                                                                                                                                                                                                                                                                                                                                                |      |
|--------------------------------------------------------------------------------------------------------------------------------------------------------------------------------------------------------------------------------------------------------------------------------------------------------------------------------------------------------------------------------------------------------------------------------------------------------------------------------------------------------------------------------------------------------------------------------------------------------------------------------------------------------------------------------------------------------------------------------------------------------------------------------------------------------------------------------------------------------------------------------------------------------------------------------------------------------------------------------------------------------------------------------------------------------------------------------------------------------------------------------------------------------------------------------------------------------------------------------------------------------------------------------------------------------------------------------------------------------------------------------------------------------------------------------------------------------------------------------------------------------------------------------------------------------------------------------|------|
| <p>(((((All Metadata:predicted OR All Metadata:prediction OR All Metadata:predictions OR All Metadata:predicting OR All Metadata:predictive OR All Metadata:predictor OR All Metadata:predictors OR All Metadata:predicts OR All Metadata:predictability OR All Metadata:predictable OR All Metadata:predictably OR All Metadata:predictively OR All Metadata:predictiveness))) OR ((All Metadata:sensitivity OR All Metadata:sensitively OR All Metadata:sensitiveness OR All Metadata:sensitive OR All Metadata:sensitivities))) OR ((All Metadata:diagnose OR All Metadata:diagnosis OR All Metadata:diagnosed OR All Metadata:diagnoses OR All Metadata:diagnostic OR All Metadata:diagnosing OR All Metadata:diagnosable OR All Metadata:diagnostics OR All Metadata:diagnoseable OR All Metadata:diagnostical OR All Metadata:diagnostician OR All Metadata:diagnosticians OR All Metadata:diagnostically))) AND ((No Keywords Specified))) AND ((No Keywords Specified))) AND ((Index Terms:EEG ) OR (Index Terms:Electroencephalograph*) OR (Index Terms: "electr* encephalograph*") OR (Index Terms: "brain wave") OR (Index Terms:"brain waves"))) OR ((Document Title:EEG) OR (Document Title:Electroencephalograph*) OR (Document Title:"electr* encephalograph*") OR (Document Title:"brain wave") OR (Document Title:"brain waves"))) AND ((Index Terms:epilep*) OR (Document Title:seizure OR Document Title:seizures OR Document Title:convulsion OR Document Title:convulsions OR Document Title:"infantile spasm" OR Document Title:"infantile spasms"))</p> | 2492 |
|--------------------------------------------------------------------------------------------------------------------------------------------------------------------------------------------------------------------------------------------------------------------------------------------------------------------------------------------------------------------------------------------------------------------------------------------------------------------------------------------------------------------------------------------------------------------------------------------------------------------------------------------------------------------------------------------------------------------------------------------------------------------------------------------------------------------------------------------------------------------------------------------------------------------------------------------------------------------------------------------------------------------------------------------------------------------------------------------------------------------------------------------------------------------------------------------------------------------------------------------------------------------------------------------------------------------------------------------------------------------------------------------------------------------------------------------------------------------------------------------------------------------------------------------------------------------------------|------|

## Google Scholar (using Publish or Perish)

<executed on December 21>

|                                                                                          |                                |
|------------------------------------------------------------------------------------------|--------------------------------|
| Electroencephalogram epilepsy [title], machine learning algorithm* diagnos* [keywords]   | 32 selected articles out of 32 |
| Electroencephalography epilepsy [title], machine learning algorithm* diagnos* [keywords] | 21 selected article out of 21  |
| EEG epilepsy [title], machine learning algorithm* diagnos* [keywords]                    | 433 sur 433                    |

## Grey literature

### Alberta: Health evidence reviews

<https://www.alberta.ca/health-evidence-reviews.aspx>

|                        |                              |
|------------------------|------------------------------|
| Electroencephalography | 0 selected articles out of 1 |
| EEG                    | 0 selected articles out of 3 |

## Canadian Agency for Drug and Technologies in Health

<https://www.cadth.ca/search?keywords>

|                        |                              |
|------------------------|------------------------------|
| Electroencephalography | 0 selected articles out of 1 |
| EEG                    | 0 selected articles out of 4 |

### Health Quality Council of Alberta

<https://hqca.ca/studies-and-reviews/>

|                        |                              |
|------------------------|------------------------------|
| Electroencephalography | 0 selected articles out of 0 |
| EEG                    | 0 selected articles out of 0 |

### Health Quality Ontario: Health Technology Assessment

Quality Standards - Health Quality Ontario (HQO) ([hqo.onario.ca](http://hqo.onario.ca))

|                        |                             |
|------------------------|-----------------------------|
| Electroencephalography | 1 selected article out of 7 |
| EEG                    | 1 selected article out of 5 |

### INESS

[https://www.inesss.qc.ca/en/publications/publications.html?tx\\_solr%5Bq%5D=EEG](https://www.inesss.qc.ca/en/publications/publications.html?tx_solr%5Bq%5D=EEG)

|                         |                              |
|-------------------------|------------------------------|
| électroencéphalographie | 0 selected articles out of 5 |
| EEG                     | 0 selected articles out of 0 |

### McGill University Health Centre (MUHC). Technology Assessment Unit Reports

<https://muhc.ca/tau/page/tau-reports>

|                        |                              |
|------------------------|------------------------------|
| Electroencephalography | 0 selected article out of 0  |
| EEG                    | 0 selected articles out of 3 |

### Newfoundland & Labrador Centre For Applied Health Research

<http://www.nlcahr.mun.ca/CHRSP/CompletedCHRSP.php>

|                                     |                               |
|-------------------------------------|-------------------------------|
| Electroencephalography AND epilepsy | 0 selected articles out of 37 |
| Electroencephalogram AND epilepsy   | 0 selected articles out of 34 |
| EEG AND epilepsy                    | 0 selected articles out of 28 |

### The Ottawa Hospital Research institute: Knowledge Synthesis Group

<http://www.ohri.ca/ksgroup/>

|                        |                              |
|------------------------|------------------------------|
| Electroencephalography | 0 selected articles out of 0 |
| Electroencephalogram   | 0 selected articles out of 0 |
| EEG AND epilepsy       | 0 selected articles out of 7 |

### Programs for Assessment of Technology in Health

<https://www.path-hta.com/research-1>

|                        |                              |
|------------------------|------------------------------|
| Electroencephalography | 0 selected articles out of 0 |
| Electroencephalogram   | 0 selected articles out of 0 |
| EEG                    | 0 selected articles out of 0 |

### The International Network of Agencies for Health Technology Assessment

#### Publications - INAHTA

|                        |                              |
|------------------------|------------------------------|
| Electroencephalography | 0 selected articles out of 1 |
| Electroencephalogram   | 0 selected articles out of 4 |
| EEG                    | 0 selected articles out of 4 |

### Horizon Scanning

#### Horizon Scanning - Australia and New Zealand Horizon Scanning Network - Technologies Assessed

|                        |                              |
|------------------------|------------------------------|
| Electroencephalography | 0 selected articles out of 1 |
| Electroencephalogram   | 0 selected articles out of 0 |
| EEG                    | 0 selected articles out of 0 |

### Austrian Academy of Sciences

<https://www.oeaw.ac.at/en/>

|                        |                              |
|------------------------|------------------------------|
| Electroencephalography | 0 selected articles out of 0 |
| Electroencephalogram   | 0 selected articles out of 0 |
| EEG                    | 0 selected articles out of 2 |

### Austrian Institute Of Health Technology Assessment

Welcome to Repository of AIHTA GmbH - Repository of AIHTA GmbH (ibg.ac.at)

|                        |                              |
|------------------------|------------------------------|
| Electroencephalography | 0 selected articles out of 4 |
| Electroencephalogram   | 0 selected articles out of 0 |

|     |                              |
|-----|------------------------------|
| EEG | 0 selected articles out of 2 |
|-----|------------------------------|

### KCE: Belgian health Knowledge Center

All reports - KCE (fgov.be)

|                         |                              |
|-------------------------|------------------------------|
| Electroencephalography  | 0 selected articles out of 1 |
| Electroencephalogram    | 0 selected articles out of 0 |
| EEG                     | 0 selected articles out of 1 |
| électroencéphalographie | 0 selected article out of 1  |

### CEDIT, the Hospital-Based HTA Agency Of AP-HP

Recommendations and Reports | Cedit (aphp.fr)

|                         |                              |
|-------------------------|------------------------------|
| Electroencephalography  | 0 selected articles out of 0 |
| Electroencephalogram    | 0 selected articles out of 0 |
| EEG                     | 0 selected articles out of 1 |
| électroencéphalographie | 0 selected article out of 0  |

### Haute Autorité de Santé

Haute Autorité de Santé - Résultat de recherche (has-sante.fr)

|                         |                               |
|-------------------------|-------------------------------|
| EEG                     | 1 selected article out of 218 |
| électroencéphalographie | 0 selected article out of 27  |

### Health Information and Quality Authority

Health Technology Assessments | HIQA

|                        |                              |
|------------------------|------------------------------|
| Electroencephalography | 0 selected articles out of 0 |
| Electroencephalogram   | 0 selected articles out of 0 |
| EEG                    | 0 selected articles out of 0 |

### Irish Health Repository

Lenus the Irish Health Repository

|                                            |                               |
|--------------------------------------------|-------------------------------|
| Title: Electroencephalography AND epilepsy | 1 selected article out of 51  |
| Electroencephalogram                       | 0 selected articles out of 3  |
| Title: EEG AND epilepsy                    | 0 selected articles out of 51 |

### Norwegian Institute of Public Health

**Norwegian Institute of Public Health - NIPH (fhi.no)**

|                        |                              |
|------------------------|------------------------------|
| Electroencephalography | 0 selected articles out of 0 |
| Electroencephalogram   | 0 selected articles out of 0 |
| EEG                    | 0 selected articles out of 3 |

**Swedish Agency for Health Technology Assessment And Assessment Of Social Services****Home (sbu.se)**

|                        |                              |
|------------------------|------------------------------|
| Electroencephalography | 0 selected articles out of 2 |
| Electroencephalogram   | 0 selected articles out of 2 |
| EEG                    | 0 selected articles out of 4 |

**Healthcare Improvement Scotland****Healthcare Improvement Scotland**

|                        |                              |
|------------------------|------------------------------|
| Electroencephalography | 0 selected articles out of 0 |
| Electroencephalogram   | 0 selected articles out of 0 |
| EEG                    | 0 selected articles out of 0 |

**National Institute for Health and Care Excellence****NICE | The National Institute for Health and Care Excellence**

|                                     |                              |
|-------------------------------------|------------------------------|
| electroencephalography AND epilepsy | 0 selected articles out of 2 |
| Electroencephalogram AND epilepsy   | 1 selected article out of 5  |
| EEG                                 | 0 selected articles out of 9 |

**NIHR Innovation Observatory****Innovation Observatory | Next generation search tools for the next generation. (nihr.ac.uk)**

|                        |                              |
|------------------------|------------------------------|
| Electroencephalography | 1 selected article out of 2  |
| Electroencephalogram   | 0 selected articles out of 1 |
| EEG                    | 0 selected articles out of 5 |

**National institute for health Research****Research Programmes (nihr.ac.uk)**

|                                     |                               |
|-------------------------------------|-------------------------------|
| electroencephalography AND epilepsy | 1 selected article out of 67  |
| Electroencephalogram AND epilepsy   | 0 selected articles out of 67 |
| EEG                                 | 0 selected articles out of 67 |

**Agency for Healthcare Research and Quality : Technology Assessment Program**

**Technology Assessment Program | Agency for Healthcare Research and Quality (ahrq.gov)**

|                                                   |                               |
|---------------------------------------------------|-------------------------------|
| Electroencephalography AND epilepsy AND diagnosis | 0 selected articles out of 1  |
| Electroencephalogram AND epilepsy AND diagnosis   | 0 selected articles out of 78 |
| EEG AND epilepsy AND diagnosis                    | 0 selected articles out of 83 |

**Agency for Healthcare Research and Quality : Evidence-Based Reports**

**Search Evidence-Based Reports | Agency for Healthcare Research and Quality (ahrq.gov)**

|                        |                              |
|------------------------|------------------------------|
| Electroencephalography | 0 selected articles out of 0 |
| Electroencephalogram   | 0 selected articles out of 0 |
| EEG AND epilepsy       | 0 selected articles out of 4 |

**Google**

|                                                                                 |                              |
|---------------------------------------------------------------------------------|------------------------------|
| intitle: Electroencephalography AND epilepsy AND machine learning AND diagnosis | 3 selected articles out of 9 |
| intitle: Electroencephalogram AND epilepsy AND machine learning AND diagnosis   | 0 selected articles out of 9 |
| intitle: EEG AND epilepsy AND machine learning AND diagnosis                    | 1 selected articles out of 9 |
| intitle: Electroencephalography AND epilepsy AND algorithm AND diagnosis        | 0 selected articles out of 9 |
| intitle: Electroencephalogram AND epilepsy AND algorithm AND diagnosis          | 0 selected articles out of 9 |
| intitle: EEG AND epilepsy AND algorithm AND diagnosis                           | 0 selected articles out of 9 |

## PRISMA-P 2015 Checklist

This checklist has been adapted for use with protocol submissions to *Systematic Reviews* from Table 3 in Moher D et al: Preferred reporting items for systematic review and meta-analysis protocols (PRISMA-P) 2015 statement. *Systematic Reviews* 2015 4:1

| Section/topic                     | #  | Checklist item                                                                                                                                                                                  | Information reported                |                          | Line number(s) |
|-----------------------------------|----|-------------------------------------------------------------------------------------------------------------------------------------------------------------------------------------------------|-------------------------------------|--------------------------|----------------|
|                                   |    |                                                                                                                                                                                                 | Yes                                 | No                       |                |
| <b>ADMINISTRATIVE INFORMATION</b> |    |                                                                                                                                                                                                 |                                     |                          |                |
| <b>Title</b>                      |    |                                                                                                                                                                                                 |                                     |                          |                |
| Identification                    | 1a | Identify the report as a protocol of a systematic review                                                                                                                                        | <input checked="" type="checkbox"/> | <input type="checkbox"/> | Title page     |
| Update                            | 1b | If the protocol is for an update of a previous systematic review, identify as such                                                                                                              | <input type="checkbox"/>            | <input type="checkbox"/> | NA             |
| <b>Registration</b>               | 2  | If registered, provide the name of the registry (e.g., PROSPERO) and registration number in the Abstract                                                                                        | <input type="checkbox"/>            | <input type="checkbox"/> | 24             |
| <b>Authors</b>                    |    |                                                                                                                                                                                                 |                                     |                          |                |
| Contact                           | 3a | Provide name, institutional affiliation, and e-mail address of all protocol authors; provide physical mailing address of corresponding author                                                   | <input checked="" type="checkbox"/> | <input type="checkbox"/> | Title page     |
| Contributions                     | 3b | Describe contributions of protocol authors and identify the guarantor of the review                                                                                                             | <input checked="" type="checkbox"/> | <input type="checkbox"/> | 265 – 270      |
| <b>Amendments</b>                 | 4  | If the protocol represents an amendment of a previously completed or published protocol, identify as such and list changes; otherwise, state plan for documenting important protocol amendments | <input type="checkbox"/>            | <input type="checkbox"/> | NA             |
| <b>Support</b>                    |    |                                                                                                                                                                                                 |                                     |                          |                |
| Sources                           | 5a | Indicate sources of financial or other support for the review                                                                                                                                   | <input checked="" type="checkbox"/> | <input type="checkbox"/> | 265 – 270      |
| Sponsor                           | 5b | Provide name for the review funder and/or sponsor                                                                                                                                               | <input checked="" type="checkbox"/> | <input type="checkbox"/> | 265 – 270      |
| Role of sponsor/funder            | 5c | Describe roles of funder(s), sponsor(s), and/or institution(s), if any, in developing the protocol                                                                                              | <input checked="" type="checkbox"/> | <input type="checkbox"/> | 265 – 270      |
| <b>INTRODUCTION</b>               |    |                                                                                                                                                                                                 |                                     |                          |                |
| <b>Rationale</b>                  | 6  | Describe the rationale for the review in the context of what is already known                                                                                                                   | <input checked="" type="checkbox"/> | <input type="checkbox"/> | 29 – 70        |
| <b>Objectives</b>                 | 7  | Provide an explicit statement of the question(s) the review will address with reference to participants, interventions, comparators, and outcomes (PICO)                                        | <input checked="" type="checkbox"/> | <input type="checkbox"/> | 71 – 75        |



| Section/topic                      | #   | Checklist item                                                                                                                                                                                                                              | Information reported                |                          | Line number(s) |
|------------------------------------|-----|---------------------------------------------------------------------------------------------------------------------------------------------------------------------------------------------------------------------------------------------|-------------------------------------|--------------------------|----------------|
|                                    |     |                                                                                                                                                                                                                                             | Yes                                 | No                       |                |
| <b>METHODS</b>                     |     |                                                                                                                                                                                                                                             |                                     |                          |                |
| Eligibility criteria               | 8   | Specify the study characteristics (e.g., PICO, study design, setting, time frame) and report characteristics (e.g., years considered, language, publication status) to be used as criteria for eligibility for the review                   | <input checked="" type="checkbox"/> | <input type="checkbox"/> | 82 – 106       |
| Information sources                | 9   | Describe all intended information sources (e.g., electronic databases, contact with study authors, trial registers, or other grey literature sources) with planned dates of coverage                                                        | <input checked="" type="checkbox"/> | <input type="checkbox"/> | 107 – 116      |
| Search strategy                    | 10  | Present draft of search strategy to be used for at least one electronic database, including planned limits, such that it could be repeated                                                                                                  | <input checked="" type="checkbox"/> | <input type="checkbox"/> | App. 1         |
| <b>STUDY RECORDS</b>               |     |                                                                                                                                                                                                                                             |                                     |                          |                |
| Data management                    | 11a | Describe the mechanism(s) that will be used to manage records and data throughout the review                                                                                                                                                | <input checked="" type="checkbox"/> | <input type="checkbox"/> | 111 – 116      |
| Selection process                  | 11b | State the process that will be used for selecting studies (e.g., two independent reviewers) through each phase of the review (i.e., screening, eligibility, and inclusion in meta-analysis)                                                 | <input checked="" type="checkbox"/> | <input type="checkbox"/> | 111 – 116      |
| Data collection process            | 11c | Describe planned method of extracting data from reports (e.g., piloting forms, done independently, in duplicate), any processes for obtaining and confirming data from investigators                                                        | <input checked="" type="checkbox"/> | <input type="checkbox"/> | 111 – 116      |
| Data items                         | 12  | List and define all variables for which data will be sought (e.g., PICO items, funding sources), any pre-planned data assumptions and simplifications                                                                                       | <input checked="" type="checkbox"/> | <input type="checkbox"/> | 118 – 154      |
| Outcomes and prioritization        | 13  | List and define all outcomes for which data will be sought, including prioritization of main and additional outcomes, with rationale                                                                                                        | <input checked="" type="checkbox"/> | <input type="checkbox"/> | 149 – 152      |
| Risk of bias in individual studies | 14  | Describe anticipated methods for assessing risk of bias of individual studies, including whether this will be done at the outcome or study level, or both; state how this information will be used in data synthesis                        | <input checked="" type="checkbox"/> | <input type="checkbox"/> | 156 – 182      |
| <b>DATA</b>                        |     |                                                                                                                                                                                                                                             |                                     |                          |                |
| Synthesis                          | 15a | Describe criteria under which study data will be quantitatively synthesized                                                                                                                                                                 | <input checked="" type="checkbox"/> | <input type="checkbox"/> | 184 – 188      |
|                                    | 15b | If data are appropriate for quantitative synthesis, describe planned summary measures, methods of handling data, and methods of combining data from studies, including any planned exploration of consistency (e.g., $I^2$ , Kendall's tau) | <input checked="" type="checkbox"/> | <input type="checkbox"/> | 198 – 221      |
|                                    | 15c | Describe any proposed additional analyses (e.g., sensitivity or subgroup analyses, meta-regression)                                                                                                                                         | <input checked="" type="checkbox"/> | <input type="checkbox"/> | 198 – 221      |
|                                    | 15d | If quantitative synthesis is not appropriate, describe the type of summary planned                                                                                                                                                          | <input checked="" type="checkbox"/> | <input type="checkbox"/> | 189 – 196      |
| Meta-bias(es)                      | 16  | Specify any planned assessment of meta-bias(es) (e.g., publication bias across studies, selective                                                                                                                                           | <input checked="" type="checkbox"/> | <input type="checkbox"/> | 220 – 227      |

| Section/topic                            | #  | Checklist item                                                                   | Information reported     |                          | Line number(s) |
|------------------------------------------|----|----------------------------------------------------------------------------------|--------------------------|--------------------------|----------------|
|                                          |    |                                                                                  | Yes                      | No                       |                |
|                                          |    | reporting within studies)                                                        |                          |                          |                |
| <b>Confidence in cumulative evidence</b> | 17 | Describe how the strength of the body of evidence will be assessed (e.g., GRADE) | <input type="checkbox"/> | <input type="checkbox"/> | NA             |

For peer review only

1  
2  
3  
4  
5  
6  
7  
8  
9  
10  
11  
12  
13  
14  
15  
16  
17  
18  
19  
20  
21  
22  
23  
24  
25  
26  
27  
28  
29  
30  
31  
32  
33  
34  
35  
36  
37  
38  
39  
40  
41  
42  
43  
44  
45  
46

# BMJ Open

## Computer-assisted analysis of routine electroencephalogram to identify hidden biomarkers of epilepsy: protocol for a systematic review

|                                 |                                                                                                                                                                                                                                                                                                                                                                                                                                                                                                                                                                                                                                                                                                                                                                                                                                                                                                                                                                                                                                                                                                                                                                               |
|---------------------------------|-------------------------------------------------------------------------------------------------------------------------------------------------------------------------------------------------------------------------------------------------------------------------------------------------------------------------------------------------------------------------------------------------------------------------------------------------------------------------------------------------------------------------------------------------------------------------------------------------------------------------------------------------------------------------------------------------------------------------------------------------------------------------------------------------------------------------------------------------------------------------------------------------------------------------------------------------------------------------------------------------------------------------------------------------------------------------------------------------------------------------------------------------------------------------------|
| Journal:                        | <i>BMJ Open</i>                                                                                                                                                                                                                                                                                                                                                                                                                                                                                                                                                                                                                                                                                                                                                                                                                                                                                                                                                                                                                                                                                                                                                               |
| Manuscript ID                   | bmjopen-2022-066932.R1                                                                                                                                                                                                                                                                                                                                                                                                                                                                                                                                                                                                                                                                                                                                                                                                                                                                                                                                                                                                                                                                                                                                                        |
| Article Type:                   | Protocol                                                                                                                                                                                                                                                                                                                                                                                                                                                                                                                                                                                                                                                                                                                                                                                                                                                                                                                                                                                                                                                                                                                                                                      |
| Date Submitted by the Author:   | 13-Dec-2022                                                                                                                                                                                                                                                                                                                                                                                                                                                                                                                                                                                                                                                                                                                                                                                                                                                                                                                                                                                                                                                                                                                                                                   |
| Complete List of Authors:       | Lemoine, Émile; University of Montreal, Department of Neurosciences; Ecole Polytechnique de Montreal, Institute of Biomedical Engineering<br>Neves Briard, Joel; University of Montreal, Department of Neurosciences; University of Montreal Hospital Centre Research Centre<br>Rioux, Bastien; University of Montreal, Department of Neurosciences; University of Montreal Hospital Centre Research Centre<br>Podbielski, Renata; University of Montreal Hospital Centre Research Centre<br>Nauche, Bénédicte; University of Montreal Hospital Centre Research Centre<br>Toffa, Denahin; University of Montreal, Department of Neurosciences; University of Montreal Hospital Centre Research Centre<br>Keezer, Mark; University of Montreal, Department of Neurosciences; Stichting Epilepsie Instellingen Nederland<br>Lesage, Frederic; Ecole Polytechnique de Montreal, Institute of Biomedical Engineering<br>Nguyen, Dang ; University of Montreal, Department of Neurosciences; University of Montreal Hospital Centre Research Centre<br>Bou Assi, Elie; University of Montreal, Department of Neurosciences; University of Montreal Hospital Centre Research Centre |
| <b>Primary Subject Heading</b>: | Neurology                                                                                                                                                                                                                                                                                                                                                                                                                                                                                                                                                                                                                                                                                                                                                                                                                                                                                                                                                                                                                                                                                                                                                                     |
| Secondary Subject Heading:      | Epidemiology, Diagnostics, Health informatics                                                                                                                                                                                                                                                                                                                                                                                                                                                                                                                                                                                                                                                                                                                                                                                                                                                                                                                                                                                                                                                                                                                                 |
| Keywords:                       | Epilepsy < NEUROLOGY, Neurophysiology < NEUROLOGY, Health informatics < BIOTECHNOLOGY & BIOINFORMATICS, NEUROLOGY                                                                                                                                                                                                                                                                                                                                                                                                                                                                                                                                                                                                                                                                                                                                                                                                                                                                                                                                                                                                                                                             |
|                                 |                                                                                                                                                                                                                                                                                                                                                                                                                                                                                                                                                                                                                                                                                                                                                                                                                                                                                                                                                                                                                                                                                                                                                                               |

SCHOLARONE™  
Manuscripts

1  
2  
3  
4  
5 **Title: Computer-assisted analysis of routine electroencephalogram to identify**  
6 **hidden biomarkers of epilepsy: protocol for a systematic review**  
7  
8  
9

10  
11  
12  
13  
14  
15 **Authors**  
16

17 Émile Lemoine<sup>1, 2, 3</sup>

18 Joel Neves Briard<sup>1, 3</sup>

19 Bastien Rioux<sup>1, 3</sup>

20 Renata Podbielski<sup>3</sup>

21 Bénédicte Nauche<sup>3</sup>

22 Denahin Toffa<sup>1, 3</sup>

23 Mark Keezer<sup>1, 3-5</sup>

24 Frédéric Lesage<sup>2</sup>

25 Dang K. Nguyen<sup>1, 3</sup>

26 Elie Bou Assi<sup>1, 3</sup>

27 <sup>1</sup>Department of Neurosciences, University of Montreal, Canada

28 <sup>2</sup>Institute of biomedical engineering, Polytechnique Montreal, Canada

29 <sup>3</sup>University of Montreal Hospital Center's Research Center, Canada

30 <sup>4</sup>School of Public Health, University of Montreal, Canada

31 <sup>5</sup>Stichting Epilepsie Instellingen Nederland (SEIN), Heemstede, The Netherlands

32  
33  
34  
35  
36  
37  
38  
39  
40  
41  
42 **Corresponding author**  
43

44 Émile Lemoine, emile.lemoine@umontreal.ca

45 1051 rue Sanguinet, Montréal, Québec. H2X 3E4  
46  
47  
48  
49  
50  
51  
52  
53  
54  
55  
56  
57  
58  
59  
60

## 1 **Abstract**

2 **Introduction:** The diagnosis of epilepsy frequently relies on the visual interpretation of the  
3 electroencephalogram (EEG) by a neurologist. The hallmark of epilepsy on EEG is the interictal  
4 epileptiform discharge (IED). This marker lacks sensitivity: it is only captured in a small percentage of  
5 30-minute routine EEGs in patients with epilepsy. In the past three decades, there has been growing  
6 interest in the use of computational methods to analyze the EEG without relying on the detection of IEDs,  
7 but none have made it to the clinical practice. We aim to review the diagnostic accuracy of quantitative  
8 methods applied to ambulatory EEG analysis to guide the diagnosis and management of epilepsy.

9 **Methods and analysis:** The protocol complies with the recommendations for systematic reviews of  
10 diagnostic test accuracy by Cochrane. We will search MEDLINE, EMBASE, EBM reviews, IEEE  
11 Explore along with grey literature for articles, conference papers and conference abstracts published after  
12 1961. We will include observational studies that present a computational method to analyze the EEG for  
13 the diagnosis of epilepsy in adults or children without relying on the identification of IEDs or seizures.  
14 The reference standard is the diagnosis of epilepsy by a physician. We will report the estimated pooled  
15 sensitivity and specificity, and receiver operating characteristic area-under-the-curve (ROC AUC) for  
16 each marker. If possible, we will perform a meta-analysis of the sensitivity and specificity and ROC AUC  
17 for each individual marker. We will assess the risk of bias using an adapted QUADAS-2 tool. We will  
18 also describe the algorithms used for signal processing, feature extraction and predictive modeling, and  
19 comment on the reproducibility of the different studies.

20 **Ethics and dissemination:** Ethical approval was not required. Findings will be disseminated through  
21 peer-reviewed publication and presented at conferences related to this field.

22 **PROSPERO registration number:** CRD42022292261

### 23 **Strengths and limitations of this study:**

- 24 • This systematic review will be the first to critically evaluate the diagnostic accuracy of  
25 computational markers of epilepsy on routine EEG, with an emphasis on identifying the barriers  
26 towards clinical translation of this technology;
- 27 • The publication of this protocol ensures transparency, and evaluation of all studies during  
28 screening, selection, and data extraction by independent reviewers reduces the risk of bias in the  
29 selection and analysis of included studies;

- 1  
2  
3 31 • High heterogeneity in reporting standards and inclusion criteria is anticipated, possibly preventing  
4 32 the reliable estimation of diagnostic performance metrics;  
5  
6 33 • Our review will constitute a comprehensive reference of current practices in the automated  
7 34 processing and analysis of routine EEG for epilepsy.  
8  
9

10 35  
11  
12

13 36 **Keywords:** Epilepsy – Electroencephalogram – Machine Learning – Diagnosis – Computer-assisted –  
14 37 Biomarker

15  
16  
17 38 **Word count (abstract):** 290  
18  
19  
20  
21  
22  
23  
24  
25  
26  
27  
28  
29  
30  
31  
32  
33  
34  
35  
36  
37  
38  
39  
40  
41  
42  
43  
44  
45  
46  
47  
48  
49  
50  
51  
52  
53  
54  
55  
56  
57  
58  
59  
60

## 39 **Background**

40 Epilepsy is characterized by an enduring propensity towards epileptic seizures—transient neurological  
41 manifestations provoked by a state of abnormal and excessive neuronal activity in the brain<sup>1</sup>. Epilepsy  
42 affects over 65 million people worldwide, and 10% of the population will experience at least one seizure  
43 in their lifetime<sup>2,3</sup>. Epileptic seizures can lead to fractures, road accidents, isolation, anxiety, cognitive  
44 decline, and death<sup>4</sup>. In specialized-care settings, the first anti-seizure medication (ASM) achieves seizure  
45 freedom in approximately 47% of patients<sup>5</sup>. A prompt diagnosis is key in the prevention of epilepsy-  
46 related morbidity and mortality<sup>4</sup>.

47 A history of epileptic seizures or a high recurrence risk after a single seizure are the basis for the  
48 definition of epilepsy by the International League Against Epilepsy (ILAE)<sup>1</sup>. Ancillary tests are often  
49 needed to estimate seizure recurrence risk after a single seizure. These include the neurological  
50 examination, neuroimaging, and the electroencephalogram (EEG).

51 An EEG records the electrical activity of the brain. It is recommended that all patients who present with a  
52 first unprovoked seizure or with new diagnosis of epilepsy undergo an EEG<sup>6,7</sup>. The initial EEG is  
53 generally performed with electrodes applied to the patient's scalp (scalp EEG or *routine EEG*) for a  
54 duration of 20–40 minutes<sup>8</sup>. The EEG tracing is then interpreted visually by a neurologist, who attempts  
55 to identify interictal epileptiform discharges (IEDs; *aka* spikes). IEDs are brief (20–200ms) sharp  
56 discharges, clearly emerging from background oscillations, often negative in polarity and sometimes  
57 followed by a typical slow wave<sup>8</sup>. The presence of interictal spikes on the EEG is considered a hallmark  
58 of epilepsy, as it represents a strong predictor of seizure recurrence<sup>9,10</sup>. Furthermore, the identification of  
59 interictal spikes can help localize an epileptic focus that may be amenable to surgical resection, and can  
60 guide the withdrawal of ASMs in patients after a prolonged period of seizure freedom<sup>11,12</sup>.

61 The interictal spike has several limitations. It occurs very sporadically: in patients with epilepsy, only 29  
62 – 55% of routine EEGs will capture these transient abnormalities<sup>8</sup>. After a first unprovoked seizure in

1  
2  
3 63 adults, the sensitivity of a single routine EEG for detecting epileptiform abnormalities is only 17%<sup>9</sup>.  
4  
5 64 Furthermore, their identification is somewhat subjective: the percent agreement between EEG experts is  
6  
7 65 around 76%<sup>13</sup>. Many physiological transient discharges can be misinterpreted as epileptiform spikes. This  
8  
9 66 can lead to the erroneous diagnosis of epilepsy, with sometimes important consequences<sup>14,15</sup>. In patients  
10  
11 67 labelled with drug-resistant epilepsy, over 25% may have had an erroneous diagnosis as a result of both  
12  
13 68 inadequate history taking and misinterpretation of the EEG<sup>16</sup>. Despite the abundant information on brain  
14  
15 69 activity recorded by the EEG, no other interictal anomalies have been validated for use in clinical  
16  
17 70 settings<sup>1,17,18</sup>.

19  
20 71 Compared to other neuroimaging modalities, a scalp EEG is inexpensive, easy to acquire, and confers  
21  
22 72 functional information with high temporal resolution<sup>19,20</sup>. Moreover, great effort was put in the last decade  
23  
24 73 by the ILAE in standardizing the equipment, recording and storage of EEG data<sup>10,21</sup>. Decades of research  
25  
26 74 have suggested that the automated analysis of EEG can identify hidden differences between with epilepsy  
27  
28 75 and non-epileptic subjects in terms of connectivity<sup>22-24</sup>, signal predictability and complexity<sup>25,26</sup>, spectral  
29  
30 76 power<sup>27,28</sup>, and chaoticity<sup>29</sup>. Computational analysis of EEG holds the promise of extracting information  
31  
32 77 that is invisible to the naked eye of the human interpreter, in an objective and reproducible manner.  
33  
34 78 Discovering new, non-visible markers of epilepsy could increase the diagnostic yield of the EEG,  
35  
36 79 improve its accessibility, and reduce costs, especially in settings where the expertise of a fellowship-  
37  
38 80 trained neurophysiologist is unavailable<sup>18,30</sup>. In spite of this, none of the proposed non-visible markers of  
39  
40 81 epilepsy have made it into clinical practice<sup>10,31</sup>. This discrepancy calls attention to the lack of  
41  
42 82 comprehensible and systematic evaluation of these new methods.  
43  
44  
45

46 83 We will perform a systematic review of diagnostic test accuracy for automated methods of interictal EEG  
47  
48 84 analysis to distinguish between patients with and without epilepsy, without relying on the detection of  
49  
50 85 spikes. The questions that this review addresses are the following: What is the current evidence on the  
51  
52 86 performances of automatically extracted hidden markers compared to the clinical diagnosis of epilepsy by  
53  
54  
55  
56  
57  
58  
59  
60



1  
2  
3 87 a physician? What is the benefit over the visual identification of IEDs on routine EEG? And what are the  
4  
5 88 different algorithms that have been tested and how does their diagnostic accuracy compare?  
6  
7  
8

## 9 89 **Methods**

### 10 89 **Study design**

11  
12  
13 90 This will be a systematic review and meta-analysis following guidance from the Cochrane Diagnostic  
14  
15 91 Test Accuracy group. We will report the results according to the PRISMA statement for diagnostic test  
16  
17 92 accuracy (PRISMA-DTA)<sup>32</sup>.  
18  
19 93

### 20 94 **Study selection criteria**

#### 21 95 **Type of studies**

22  
23 96 We will include all studies that describe a computed marker of epilepsy on routine (scalp) EEG which  
24  
25 97 does not explicitly rely on the identification of interictal spikes or ictal activity (seizures). Studies must  
26  
27 98 compare the EEG signal of individuals with and without epilepsy. We will include retrospective or  
28  
29 99 prospective comparative studies enabling the assessment of diagnostic accuracy (cohort or case-control  
30  
31 100 studies). We will exclude studies reporting data on non-human animals only, studies that include only  
32  
33 101 intracranial or critical care EEG recordings, studies that do not include both individuals with and without  
34  
35 102 epilepsy, and studies that are focused solely on seizure/spike detection or on short-term (<24h) seizure  
36  
37 103 prediction. For studies that include multiple EEG types, we will only extract data that meet the inclusion  
38  
39 104 criteria. We restricted the search to studies published after 1961 (the first use of digital EEG)<sup>33</sup>. There are  
40  
41 105 no restrictions for language.  
42  
43  
44  
45  
46  
47  
48  
49  
50  
51  
52  
53  
54  
55  
56  
57  
58  
59  
60

## 106 **Population**

107 Our population of interest is individuals undergoing routine EEG in a clinical or research setting. A  
108 routine EEG is defined as a 20- to 60-minute scalp recording using the international 10–20 electrodes  
109 system, with or without prior sleep deprivation. There is no restriction for age groups or diagnoses.

## 110 **Reference standard**

111 We defined the reference standard as the diagnosis of epilepsy by a physician based on criteria specified  
112 by the authors (clinical or para-clinical). These criteria must accord with the definition of epilepsy by the  
113 ILAE: having had at least one seizure and long-term enduring predisposition to other unprovoked  
114 seizures<sup>1,34</sup>.

## 115 **Index test**

116 The index test is a characteristic or feature which is computationally extracted from the EEG signal to  
117 identify patients with epilepsy, without relying on detecting IEDs or seizures. These include measures of  
118 connectivity, entropy, chaoticity, and power spectrum density<sup>35</sup>. Also included are statistical models that  
119 combine several features or models that take as input the raw or processed EEG.

## 120 **Search strategy**

121 The search strategy (**Appendix 1**) was developed by two medical librarians specialized in systematic  
122 reviews (BN and RP), and peer-reviewed by a senior colleague. We will search MEDLINE (Ovid),  
123 EMBASE (Ovid), EBM reviews (Ovid), IEEE Explore along with grey literature for articles, conference  
124 papers and conference abstracts. We will use the Covidence platform (Melbourne, Australia) to manage  
125 our data for eligibility assessment, selection, and data collection. Two independent reviewers (EL, and  
126 either JNB or BR) will screen the records for eligibility using their title and abstract. Any item selected by  
127 either reviewer will proceed to the next phase. This process will be repeated on the screened items, this  
128 time by consulting the items' full text. A third, senior reviewer (EBA) will settle conflicts as necessary  
129 during the final selection.

1  
2  
3 130 **Data items**  
4

5  
6 131 Data collection will be performed using Covidence by two independent reviewers (EL and JNB/BR), and  
7  
8 132 conflicts will be resolved by a third author (EBA). Authors of the primary study will be contacted if the  
9  
10 133 required data are not available in the original publication. Data collection will include the following  
11  
12 134 information:

- 13  
14 135 1. Title and authors of the study, country of sampling, year of publication;  
15  
16 136 2. Study type: retrospective vs. prospective, design (cohort, case control);  
17  
18 137 3. Study sample: exclusion and inclusion criteria, number of screened and included patients;  
19  
20 138 4. Data collection:  
21  
22 a. Number of patients, number of EEGs, duration of EEG recordings, use of activation  
23 139 procedures (hyperventilation, photic stimulation, sleep deprivation), setting of recording  
24 140 (hospitalized or ambulatory), whether the same protocol was used for all patients;  
25  
26 141 b. Number of electrodes, sampling frequency;  
27  
28 142 c. If public dataset: reference to the original dataset, dataset name, exclusion/inclusion  
29 143 criteria used on the EEG segments from the dataset;  
30  
31 144 d. Participant characteristics: age, sex, comorbidities, number of ASM, age of first seizure;  
32  
33 145 5. Reference standard: whether a predefined reference standard was used, definition of reference  
34 146 standard, whether all patients underwent the same reference standard, time lapse between  
35 147 reference standard and EEG;  
36  
37 148 6. Index test:  
38  
39 a. Pre-processing: artifact detection and removal (automated or manual), filtering method,  
40 149 filtering frequencies, segmentation protocol (whole EEG vs. EEG segments, window  
41 150 size, overlapping vs. non-overlapping segments, manual vs. automated selection of  
42 151 segments), channel selection;  
43  
44  
45  
46  
47  
48  
49  
50  
51  
52  
53  
54  
55  
56  
57  
58  
59  
60

- 1  
2  
3 154 b. Feature extraction and selection: multi-channel vs. single channel, number of channels  
4  
5 155 selected, whether feature selection was performed, feature extraction algorithm, feature  
6  
7 156 selection method, whether feature selection was applied to data before vs. after excluding  
8  
9 157 testing data;  
10  
11 158 c. Classification: algorithm(s) used for classification, testing methodology (cross-validation  
12  
13 159 vs. held out testing set);  
14  
15 160 d. Metric used to report diagnostic performances: ROC AUC,  
16  
17 161 accuracy/sensitivity/specificity, F<sub>1</sub>-score, reporting of confidence intervals (CI);  
18  
19  
20 162 7. Diagnostic performances: number of true positives, number of true negatives, number of false  
21  
22 163 positives, number of false negatives, reported accuracy, reported sensitivity, reported specificity,  
23  
24 164 reported F<sub>1</sub>-score, reported ROC AUC (if more than one index test is performed on the same  
25  
26 165 patient, we will only consider the first test);  
27  
28 166 8. Reproducibility: whether every data processing step is detailed, whether methods can be  
29  
30 167 reproduced easily, data availability, code availability, open-source computer libraries referenced.  
31  
32

### 168 **Risk of bias**

169 The risk of bias of all included studies will be assessed through an adapted version of the QUADAS-2  
170 tool<sup>36</sup>. Risk of bias for each of the following four elements will be evaluated by two independent  
171 reviewers (EL and JNB/BR) as low, high, or unclear. Conflicts will be resolved by a third author (EBA).  
172 In addition, all publicly available datasets used by at least one of the included studies will be evaluated  
173 with the same tool. The following items will be assessed:

#### 174 1. Patient selection

- 175 a. Is the population representative of clinical practice?  
176 b. Are inclusion and exclusion criteria identical for cases (patients with epilepsy) and  
177 controls?

- 1  
2  
3 178 c. Are withdrawals explained and appropriate? If individual EEG segments were excluded,  
4  
5 179 were the same criteria used for all segments?  
6  
7 180 2. Index test  
8  
9 181 a. Were the protocols used for recording the EEG identical in all patients, irrespective of the  
10  
11 182 epilepsy diagnosis?  
12  
13 183 b. Was the index test validated on an independent sample of patients (patients which were  
14  
15 184 not used to identify the index test's threshold or train the learning algorithm)?  
16  
17 185 3. Reference standard  
18  
19 186 a. Are the criteria used for the diagnosis of epilepsy specified and acceptable (likely to  
20  
21 187 correctly classify the target condition)?  
22  
23 188 b. Was the reference standard assessment independent and blinded to the index test?  
24  
25 189 4. Flow and timing  
26  
27 190 a. Did the whole sample undergo the reference standard?  
28  
29 191 b. Did the whole sample undergo the same reference standard?  
30  
31 192 c. Was the time lapse between reference standard and EEG acceptable?  
32  
33 193 d. Was the same data used in the index method available at the time of the reference  
34  
35 194 standard?  
36  
37 195 e. Were all EEGs included in the analysis?  
38  
39  
40  
41

## 42 196 **Data synthesis**

43  
44 197 We will provide a table summarizing every published study included in the review, comparing the  
45  
46 198 studies' design, population, reference standard, dataset size, data processing methods, and diagnostic  
47  
48 199 accuracy. We will also provide a figure that summarizes the risk of bias for each item in the adapted  
49  
50 200 QUADAS-2 tool, comparing 1) every individual article included in the review, and 2) every public  
51  
52 201 dataset that is used in  $\geq 2$  studies.  
53  
54  
55  
56  
57  
58  
59  
60

1  
2  
3 202 We will describe the number of patients, number of EEGs, duration of EEGs, and the EEG-duration-per-  
4  
5 203 patient ratio across all included studies. We will report the pooled proportion of patients with focal vs.  
6  
7 204 generalized epilepsy, adult vs. children, structural vs. non-structural epilepsy, IEDs on EEG, and with  
8  
9 205 specific epilepsy syndromes. For every publicly available dataset identified during the review, we will  
10  
11 206 report the number of studies that used that dataset in their work.

12  
13  
14 207 We will summarize in a table the methods used by the different articles during the pipeline's algorithm  
15  
16 208 (pre-processing, feature extraction, feature selection, and classification algorithm), along with the  
17  
18 209 proportion of studies that used each method.

## 20 **Analyses**

21  
22  
23 211 We will estimate the specificity and sensitivity for each study, using the Wilson score to compute 95%  
24  
25 212 CI. For studies with varying thresholds, we will estimate the ROC AUC and 95% CI.

26  
27  
28 213 If there are sufficient ( $\geq 5$ ) studies that report the number of true/false positives and true/false negatives,  
29  
30 214 we will estimate the pooled sensitivity and specificity of each individual marker using a hierarchical,  
31  
32 215 bivariate generalized linear mixed model<sup>37</sup>. This allows us to account for the correlation between  
33  
34 216 specificity and sensitivity in a single study. If  $\geq 5$  studies report these numbers for varying thresholds, we  
35  
36 217 will estimate the pooled ROC curve using the Rutter and Gatsonis HSROC model<sup>38</sup>. All analyses will be  
37  
38 218 implemented with the R statistical language. A  $p$ -value  $< 0.05$  will be considered statistically significant.  
39  
40 219 Given insufficient data for the pooled estimates, we will only describe the diagnostic performances  
41  
42 220 (sensitivity, specificity, ROC AUC) narratively. We will present the results of the analyses with forest  
43  
44 221 plots. We will compare the performance of the computational markers for the diagnosis of epilepsy to the  
45  
46 222 visual identification of IEDs on EEG.<sup>9</sup>

47  
48  
49 223 We will quantify heterogeneity using the variances of the logit specificity and sensitivity, as well as the  
50  
51 224 median odds ratio (median OR)<sup>39</sup>. The median OR is a measure of inter-study variance translated on the  
52  
53 225 OR scale. It corresponds to the increase in the odds of being true positive/negative in a patient/control  
54  
55 226 going from a study with lower sensitivity/specificity to a study with higher sensitivity/specificity. For

1  
2  
3 227 heterogeneity in the ROC plane, we will compute the area of the 95% prediction ellipse and present the  
4  
5 228 results on a scatterplot in the ROC plane.<sup>39</sup> The median OR and the area of the 95% prediction ellipse are  
6  
7 229 easily obtained and interpreted, and take into account the correlation between a single study's specificity  
8  
9 230 and sensitivity in contrast to univariate methods like Cochran's Q and  $I^2$ .<sup>37,40</sup> We will perform subgroup  
10  
11 231 analysis for the following variables: epilepsy type (focal, generalized), epilepsy etiology (structural vs.  
12  
13 232 non-structural), presence of IEDs, age groups (children (< 18 y.o.), adults ( $\geq$  18 y.o.)), epilepsy  
14  
15 233 syndromes, extracted marker, and dataset used. We will also perform a subgroup analysis for populations  
16  
17 234 with a higher prevalence of IEDs without epilepsy (cerebral palsy, autism spectrum disorder, attention  
18  
19 235 deficit disorder)<sup>41</sup> and for extra-temporal vs. temporal focal epilepsy. We will assess heterogeneity for all  
20  
21 236 subgroup analyses. We will consider a study as belonging to a particular subgroup if  $\geq$ 80% of the studied  
22  
23 237 population belongs to that subgroup. Sensitivity analysis will be conducted for the main analyses by  
24  
25 238 excluding studies with overall high/unclear risk of bias.

26  
27  
28  
29 239 Some studies use multiple markers to classify patients with epilepsy from controls (*e.g.*, as input features  
30  
31 240 for a machine learning algorithm). For each marker that is used in  $\geq$  2 of such studies, we will evaluate  
32  
33 241 the number of studies for which these markers were identified as "important" (selected for the  
34  
35 242 classification task or statistically significant in separating the two classes) and the ratio between the  
36  
37 243 number of studies in which this marker was extracted vs. identified as important.

38  
39  
40 244 Reporting bias for sensitivity and specificity will be evaluated by visual inspection of funnel plots.

## 41 42 43 245 **Patient and public involvement**

44  
45 246 No patients will be involved for this study.

## 46 47 48 49 247 **Discussion**

50  
51  
52 248 The interictal EEG is key in informing the diagnosis of epilepsy, solely based on the visual identification  
53  
54 249 of interictal spikes.<sup>42</sup> Despite years of research on computational biomarkers of epilepsy, only these

1  
2  
3 250 spikes are currently used in clinical settings.<sup>1,17,18</sup> This review aims to systematically evaluate the  
4  
5 251 performances of hidden interictal markers of epilepsy on EEG against the clinical diagnosis by a  
6  
7 252 physician, describe the data processing pipelines favored by the researchers to classify the EEG for  
8  
9 253 epilepsy diagnosis, and identify the pitfalls that prevent clinical translation of these algorithms.  
10  
11  
12 254 Algorithms have gained growing interest in medicine for their potential to assist diagnosis and guide  
13  
14 255 clinical decision-making.<sup>43</sup> EEG analysis is well-suited for this application due to the complex nature of  
15  
16 256 the EEG signal. Automated extraction of new epilepsy markers on routine EEG could lead to reduced rate  
17  
18 257 of misdiagnosis, increased availability in areas without access to an expert neurophysiologist, and more  
19  
20 258 efficient clinical trials. Research on automatic analysis of EEG data is thriving, in part assisted by the  
21  
22 259 recent increase in computational capacities.<sup>44-51</sup> However, automatic analysis of EEG is not mentioned in  
23  
24 260 any of the high-quality clinical practice guidelines systematically reviewed by the ILAE.<sup>17</sup>  
25  
26  
27 261 In recent years, increased computational capacities have allowed the development of powerful algorithms  
28  
29 262 that can learn complex representations such as medical images and EEG signals.<sup>44,52,53</sup> A growing number  
30  
31 263 of algorithms have now been approved by the United States Food and Drug Administration for assisting  
32  
33 264 in the diagnosis of several diseases.<sup>54</sup> Recent systematic reviews have found that most of the studies on  
34  
35 265 automated diagnosis using artificial intelligence have high risk of bias, mostly due to patient selection  
36  
37 266 methodology and absence of validation on external data.<sup>55-57</sup> Systematic reviews on computer-based  
38  
39 267 clinical-decision support systems also highlight the need for more robust patient selection.<sup>58-63</sup>  
40  
41  
42 268 Translation of technology to clinical practice requires strong evidence based on high quality research.  
43  
44 269 This review is important because it will establish the potential of automatic analysis of EEG as a  
45  
46 270 diagnostic tool for epilepsy, and if evidence to support its use is lacking, it will identify the pitfalls that  
47  
48 271 need to be overcome in future research. Also, by systematically describing current practices that are used  
49  
50 272 by research groups, it will serve as a reference for new researchers in the field. Upon completion of this  
51  
52 273 review, we will have a better understanding of the potential ways that automated analysis of EEG could  
53  
54  
55  
56  
57  
58  
59  
60



1  
2  
3 274 be integrated into the clinical workflow; this information will be valuable to anyone designing clinical  
4  
5 275 studies on clinical-decision support systems for epilepsy.  
6

7  
8 276 We anticipate that diagnostic accuracy of automatic analysis of EEG for epilepsy will be hard to estimate  
9  
10 277 because of the high heterogeneity between the different dataset used and between the data processing  
11  
12 278 methodology. We also anticipate high risk of bias in many studies, because of the high volume of “proof-  
13  
14 279 of-concept” studies that emphasize computation performances and algorithm development over rigorous  
15  
16 280 diagnostic study methodology. In these cases, we hope to produce recommendations that will assist in  
17  
18 281 bridging the gap between the development of new automated markers and validation in appropriate  
19  
20 282 populations, for ultimate implementation into clinical practice.  
21  
22  
23

## 24 283 **List of abbreviations**

25  
26  
27 284 ASM: anti-seizure medication; CI: confidence interval; EEG: electroencephalogram; IED: interictal  
28  
29 285 epileptiform discharge; ILAE: International League Against Epilepsy; ROC AUC: receiver operating-  
30  
31 286 characteristic area-under-the-curve.  
32  
33  
34

## 35 287 **Funding**

36  
37  
38 288 MRK and DKN report unrestricted educational grants from UCB and Eisai, and research grants for  
39  
40 289 investigator-initiated studies from UCB and Eisai. Émile Lemoine is supported by a scholarship from the  
41  
42 290 Canadian Institute of Health Research. Dang Nguyen is supported by the Canada Research Chairs  
43  
44 291 Program, the Canadian Institutes of Health Research, and Natural Sciences and Engineering Research  
45  
46 292 Council of Canada.  
47  
48  
49  
50

## 51 293 **Authors' contributions**

52  
53 294 EL planned the study, drafted the protocol, reviewed the search strategy, and is the guarantor of the  
54  
55 295 review. DT, FL, DKN, and EBA participated in the design of the study. JNB, BR, DT, MRK, FL, DKN,  
56  
57  
58  
59

296 and EBA provided content expertise and critically reviewed the manuscript and the search strategy. BN  
297 and RP designed the search strategy. All authors read and approved the final manuscript.

### 298 **Competing interests**

299 None of the authors have any competing interest to declare.

### 300 **Data sharing statement**

301 Data collected for this study will be available upon reasonable request.

### 302 **Ethics and dissemination statement**

303 Ethics approval is not required as this is a review of published evidence. Findings will be disseminated  
304 through publication in a peer-review journal and presentations at conferences related to this field.

### 305 **References**

- 306 1. Fisher, R. S. *et al.* ILAE Official Report: A practical clinical definition of epilepsy. *Epilepsia* **55**,  
307 475–482 (2014).
- 308 2. Ngugi, A. K., Bottomley, C., Kleinschmidt, I., Sander, J. W. & Newton, C. R. Estimation of the  
309 burden of active and life-time epilepsy: a meta-analytic approach. *Epilepsia* **51**, 883–890 (2010).
- 310 3. Hauser, W. A. & Beghi, E. First seizure definitions and worldwide incidence and mortality. *Epilepsia*  
311 **49 Suppl 1**, 8–12 (2008).
- 312 4. Devinsky, O., Spruill, T., Thurman, D. & Friedman, D. Recognizing and preventing epilepsy-related  
313 mortality: A call for action. *Neurology* **86**, 779–786 (2016).
- 314 5. Kwan, P. & Brodie, M. J. Early identification of refractory epilepsy. *N Engl J Med* **342**, 314–319  
315 (2000).

- 1  
2  
3 316 6. Krumholz, A. *et al.* Practice Parameter: evaluating an apparent unprovoked first seizure in adults (an  
4  
5 317 evidence-based review): report of the Quality Standards Subcommittee of the American Academy of  
6  
7 318 Neurology and the American Epilepsy Society. *Neurology* **69**, 1996–2007 (2007).
- 9 319 7. Hirtz, D. *et al.* Practice parameter: evaluating a first nonfebrile seizure in children: report of the  
10  
11 320 quality standards subcommittee of the American Academy of Neurology, The Child Neurology  
12  
13 321 Society, and The American Epilepsy Society. *Neurology* **55**, 616–623 (2000).
- 15 322 8. Pillai, J. & Sperling, M. R. Interictal EEG and the Diagnosis of Epilepsy. *Epilepsia* **47**, 14–22 (2006).
- 17 323 9. Bouma, H. K., Labos, C., Gore, G. C., Wolfson, C. & Keezer, M. R. The diagnostic accuracy of  
18  
19 324 routine electroencephalography after a first unprovoked seizure. *European Journal of Neurology* **23**,  
20  
21 325 455–463 (2016).
- 23 326 10. Tatum, W. O. *et al.* Clinical utility of EEG in diagnosing and monitoring epilepsy in adults. *Clinical*  
24  
25 327 *Neurophysiology* **129**, 1056–1082 (2018).
- 27 328 11. Lamberink, H. J. *et al.* Individualised prediction model of seizure recurrence and long-term outcomes  
28  
29 329 after withdrawal of antiepileptic drugs in seizure-free patients: a systematic review and individual  
30  
31 330 participant data meta-analysis. *Lancet Neurol* **16**, 523–531 (2017).
- 33 331 12. West, S. *et al.* Surgery for epilepsy. *Cochrane Database of Systematic Reviews* (2019)  
34  
35 332 doi:10.1002/14651858.CD010541.pub3.
- 37 333 13. Jing, J. *et al.* Interrater Reliability of Experts in Identifying Interictal Epileptiform Discharges in  
38  
39 334 Electroencephalograms. *JAMA Neurology* **77**, 49–57 (2020).
- 41 335 14. Amin, U. & Benbadis, S. R. The Role of EEG in the Erroneous Diagnosis of Epilepsy. *J Clin*  
42  
43 336 *Neurophysiol* **36**, (2019).
- 45 337 15. Kang, J. Y. & Krauss, G. L. Normal Variants Are Commonly Overread as Interictal Epileptiform  
46  
47 338 Abnormalities. *J Clin Neurophysiol* **36**, 257–263 (2019).
- 49 339 16. Smith, D., Defalla, B. A. & Chadwick, D. W. The misdiagnosis of epilepsy and the management of  
50  
51 340 refractory epilepsy in a specialist clinic. *QJM* **92**, 15–23 (1999).
- 52  
53  
54  
55  
56  
57  
58  
59  
60

- 1  
2  
3 341 17. Sauro, K. M. *et al.* The current state of epilepsy guidelines: A systematic review. *Epilepsia* **57**, 13–23  
4  
5 342 (2016).  
6  
7 343 18. Engel Jr, J., Bragin, A. & Staba, R. Nonictal EEG biomarkers for diagnosis and treatment. *Epilepsia*  
8  
9 344 *Open* **3**, 120–126 (2018).  
10  
11 345 19. DellaBadia Jr, J., Bell, W. L., Keyes Jr, J. W., Mathews, V. P. & Glazier, S. S. Assessment and cost  
12  
13 346 comparison of sleep-deprived EEG, MRI and PET in the prediction of surgical treatment for epilepsy.  
14  
15 347 *Seizure* **11**, 303–309 (2002).  
16  
17 348 20. Abdelhady, S., Shokri, H., Fathy, M. & wahid el din, mona M. Evaluation of the direct costs of  
18  
19 349 epilepsy in a sample of Egyptian patients following up in Ain Shams University Hospital. *The*  
20  
21 350 *Egyptian Journal of Neurology, Psychiatry and Neurosurgery* **56**, 112 (2020).  
22  
23 351 21. Velis, D., Plouin, P., Gotman, J., Da Silva, F. L., & members of the ILAE DMC Subcommittee on  
24  
25 352 Neurophysiology. Recommendations Regarding the Requirements and Applications for Long-term  
26  
27 353 Recordings in Epilepsy. *Epilepsia* **48**, 379–384 (2007).  
28  
29 354 22. Schmidt, H. *et al.* A computational biomarker of idiopathic generalized epilepsy from resting state  
30  
31 355 EEG. *Epilepsia* **57**, e200–e204 (2016).  
32  
33 356 23. Lopes, M. A. *et al.* Revealing epilepsy type using a computational analysis of interictal EEG.  
34  
35 357 *Scientific Reports* **9**, 10169 (2019).  
36  
37 358 24. Verhoeven, T. *et al.* Automated diagnosis of temporal lobe epilepsy in the absence of interictal  
38  
39 359 spikes. *NeuroImage: Clinical* **17**, 10–15 (2018).  
40  
41 360 25. Ouyang, C.-S., Yang, R.-C., Wu, R.-C., Chiang, C.-T. & Lin, L.-C. Determination of Antiepileptic  
42  
43 361 Drugs Withdrawal Through EEG Hjorth Parameter Analysis. *Int. J. Neur. Syst.* **30**, 2050036 (2020).  
44  
45 362 26. Zhang, J.-H. *et al.* Personalized prediction model for seizure-free epilepsy with levetiracetam therapy:  
46  
47 363 a retrospective data analysis using support vector machine. *Br J Clin Pharmacol* **84**, 2615–2624  
48  
49 364 (2018).  
50  
51  
52  
53  
54  
55  
56  
57  
58  
59  
60

- 1  
2  
3 365 27. Oliva, J. T. & Rosa, J. L. G. Differentiation between Normal and Interictal EEG Using Multitaper  
4  
5 366 Spectral Classifiers. in *2018 International Joint Conference on Neural Networks (IJCNN)* 1–8  
6  
7 367 (2018). doi:10.1109/IJCNN.2018.8489503.  
8  
9 368 28. Pegg, E. J., Taylor, J. R. & Mohanraj, R. Spectral power of interictal EEG in the diagnosis and  
10  
11 369 prognosis of idiopathic generalized epilepsies. *Epilepsy & Behavior* **112**, 107427 (2020).  
12  
13 370 29. Jacob, J. E., Sreelatha, V. V., Iype, T., Nair, G. K. & Yohannan, D. G. Diagnosis of epilepsy from  
14  
15 371 interictal EEGs based on chaotic and wavelet transformation. *Analog Integrated Circuits and Signal*  
16  
17 372 *Processing* **89**, 131–138 (2016).  
18  
19 373 30. Wahl, B., Cossy-Gantner, A., Germann, S. & Schwalbe, N. R. Artificial intelligence (AI) and global  
20  
21 374 health: how can AI contribute to health in resource-poor settings? *BMJ Global Health* **3**, e000798  
22  
23 375 (2018).  
24  
25 376 31. Pitkänen, A. *et al.* Advances in the development of biomarkers for epilepsy. *The Lancet Neurology*  
26  
27 377 **15**, 843–856 (2016).  
28  
29 378 32. McInnes, M. D. F. *et al.* Preferred Reporting Items for a Systematic Review and Meta-analysis of  
30  
31 379 Diagnostic Test Accuracy Studies: The PRISMA-DTA Statement. *JAMA* **319**, 388–396 (2018).  
32  
33 380 33. November, J. Biomedical computing: Digitizing life in the United States. *Biomedical Computing:*  
34  
35 381 *Digitizing Life in the United States* 1–344 (2012).  
36  
37 382 34. Fisher, R. S. *et al.* Epileptic seizures and epilepsy: definitions proposed by the International League  
38  
39 383 Against Epilepsy (ILAE) and the International Bureau for Epilepsy (IBE). *Epilepsia* **46**, 470–472  
40  
41 384 (2005).  
42  
43 385 35. Supriya, S., Siuly, S., Wang, H. & Zhang, Y. Automated epilepsy detection techniques from  
44  
45 386 electroencephalogram signals: a review study. *Health Information Science and Systems* **8**, 33 (2020).  
46  
47 387 36. Whiting, P. F. *et al.* QUADAS-2: a revised tool for the quality assessment of diagnostic accuracy  
48  
49 388 studies. *Ann Intern Med* **155**, 529–536 (2011).  
50  
51 389 37. Reitsma, J. B. *et al.* Bivariate analysis of sensitivity and specificity produces informative summary  
52  
53 390 measures in diagnostic reviews. *Journal of Clinical Epidemiology* **58**, 982–990 (2005).  
54  
55  
56  
57  
58  
59  
60

- 1  
2  
3 391 38. Rutter, C. M. & Gatsonis, C. A. A hierarchical regression approach to meta-analysis of diagnostic test  
4  
5 392 accuracy evaluations. *Stat Med* **20**, 2865–2884 (2001).  
6  
7 393 39. Plana, M. N., Pérez, T. & Zamora, J. New measures improved the reporting of heterogeneity in  
8  
9 394 diagnostic test accuracy reviews: a metaepidemiological study. *Journal of Clinical Epidemiology*  
10  
11 395 **131**, 101–112 (2021).  
12  
13 396 40. Rücker, G., Schwarzer, G., Carpenter, J. R. & Schumacher, M. Undue reliance on I2 in assessing  
14  
15 397 heterogeneity may mislead. *BMC Medical Research Methodology* **8**, 79 (2008).  
16  
17 398 41. So, E. L. Interictal Epileptiform Discharges in Persons Without A History of Seizures: What Do They  
18  
19 399 Mean? *Journal of Clinical Neurophysiology* **27**, 229–238 (2010).  
20  
21 400 42. Smith, S. J. M. EEG in the diagnosis, classification, and management of patients with epilepsy. *J*  
22  
23 401 *Neurol Neurosurg Psychiatry* **76**, ii2–ii7 (2005).  
24  
25 402 43. Obermeyer, Z. & Emanuel, E. J. Predicting the Future - Big Data, Machine Learning, and Clinical  
26  
27 403 Medicine. *N Engl J Med* **375**, 1216–1219 (2016).  
28  
29 404 44. Roy, Y. *et al.* Deep learning-based electroencephalography analysis: a systematic review. *Journal of*  
30  
31 405 *Neural Engineering* **16**, 051001 (2019).  
32  
33 406 45. Craik, A., He, Y. & Contreras-Vidal, J. L. Deep learning for electroencephalogram (EEG)  
34  
35 407 classification tasks: a review. *J. Neural Eng.* **16**, 031001 (2019).  
36  
37 408 46. Rasheed, K. *et al.* Machine Learning for Predicting Epileptic Seizures Using EEG Signals: A  
38  
39 409 Review. *IEEE Rev. Biomed. Eng.* **14**, 139–155 (2020).  
40  
41 410 47. Gemein, L. A. W. *et al.* Machine-learning-based diagnostics of EEG pathology. *NeuroImage* **220**,  
42  
43 411 117021 (2020).  
44  
45 412 48. Mesraoua, B. *et al.* Electroencephalography in epilepsy: look for what could be beyond the visual  
46  
47 413 inspection. *Neurological Sciences* **40**, 2287–2291 (2019).  
48  
49 414 49. van Diessen, E. *et al.* Brain Network Organization in Focal Epilepsy: A Systematic Review and  
50  
51 415 Meta-Analysis. *PLOS ONE* **9**, e114606 (2014).  
52  
53  
54  
55  
56  
57  
58  
59  
60

- 1  
2  
3 416 50. Faiman, I., Smith, S., Hodsoll, J., Young, A. H. & Shotbolt, P. Resting-state EEG for the diagnosis of  
4  
5 417 idiopathic epilepsy and psychogenic nonepileptic seizures: A systematic review. *Epilepsy & Behavior*  
6  
7 418 **121**, 108047 (2021).  
8  
9 419 51. Pegg, E. J., Taylor, J. R., Keller, S. S. & Mohanraj, R. Interictal structural and functional connectivity  
10  
11 420 in idiopathic generalized epilepsy: A systematic review of graph theoretical studies. *Epilepsy &*  
12  
13 421 *Behavior* **106**, (2020).  
14  
15 422 52. Esteva, A. *et al.* A guide to deep learning in healthcare. *Nature Medicine* **25**, 24–29 (2019).  
16  
17 423 53. Litjens, G. *et al.* A survey on deep learning in medical image analysis. *Medical Image Analysis* **42**,  
18  
19 424 60–88 (2017).  
20  
21 425 54. FDA Cleared AI Algorithms. *American College of Radiology Data Science Institute*  
22  
23 426 <https://models.acrdsi.org>.  
24  
25 427 55. Aggarwal, R. *et al.* Diagnostic accuracy of deep learning in medical imaging: a systematic review  
26  
27 428 and meta-analysis. *npj Digital Medicine* **4**, 65 (2021).  
28  
29 429 56. Liu, X. *et al.* A comparison of deep learning performance against health-care professionals in  
30  
31 430 detecting diseases from medical imaging: a systematic review and meta-analysis. *The Lancet Digital*  
32  
33 431 *Health* **1**, e271–e297 (2019).  
34  
35 432 57. Nagendran, M. *et al.* Artificial intelligence versus clinicians: systematic review of design, reporting  
36  
37 433 standards, and claims of deep learning studies. *BMJ* vol. 368 m689 (2020).  
38  
39 434 58. Riches, N. *et al.* The Effectiveness of Electronic Differential Diagnoses (DDX) Generators: A  
40  
41 435 Systematic Review and Meta-Analysis. *PLoS One* **11**, e0148991 (2016).  
42  
43 436 59. Bright, T. J. *et al.* Effect of clinical decision-support systems: a systematic review. *Ann Intern Med*  
44  
45 437 **157**, 29–43 (2012).  
46  
47 438 60. Jaspers, M. W. M., Smeulers, M., Vermeulen, H. & Peute, L. W. Effects of clinical decision-support  
48  
49 439 systems on practitioner performance and patient outcomes: a synthesis of high-quality systematic  
50  
51 440 review findings. *J Am Med Inform Assoc* **18**, 327–334 (2011).  
52  
53  
54  
55  
56  
57  
58  
59  
60

- 1  
2  
3 441 61. Garg, A. X. *et al.* Effects of computerized clinical decision support systems on practitioner  
4  
5 442 performance and patient outcomes: a systematic review. *JAMA* **293**, 1223–1238 (2005).  
6  
7 443 62. Varghese, J., Kleine, M., Gessner, S. I., Sandmann, S. & Dugas, M. Effects of computerized decision  
8  
9 444 support system implementations on patient outcomes in inpatient care: a systematic review. *J Am*  
10  
11 445 *Med Inform Assoc* **25**, 593–602 (2018).  
12  
13 446 63. Vasey, B. *et al.* Association of Clinician Diagnostic Performance With Machine Learning–Based  
14  
15 447 Decision Support Systems: A Systematic Review. *JAMA Network Open* **4**, e211276–e211276 (2021).  
16  
17  
18 448



## Appendix 1: Search strategy

### Medline [OVID]

Ovid MEDLINE(R) and Epub Ahead of Print, In-Process, In-Data-Review & Other Non-Indexed Citations, Daily and Versions(R) <1946 to December 13, 2021>

| #  | Searches                                                                                                                   | Results |
|----|----------------------------------------------------------------------------------------------------------------------------|---------|
| 1  | exp Electroencephalography/                                                                                                | 173584  |
| 2  | (EEG* or Electroencephalograph* or "electr* encephalograph*" or "brain wave*").tw,kf.                                      | 111352  |
| 3  | 1 or 2                                                                                                                     | 201652  |
| 4  | exp Epilepsy/                                                                                                              | 118716  |
| 5  | Epilep*.tw,kf.                                                                                                             | 152323  |
| 6  | (seizure* or convulsion* or infantile spasm*).tw,kf.                                                                       | 147989  |
| 7  | (BCECTS or BECTS).tw,kf.                                                                                                   | 346     |
| 8  | (panayiotopoulos adj2 syndrome*).tw,kf.                                                                                    | 166     |
| 9  | ((Nodding or dravet or doose or may white or fukhura) adj2 (disease* or syndrome*)).tw,kf.                                 | 1407    |
| 10 | (myoencephalopathy ragged red fiber* disease* or MERRF).tw,kf.                                                             | 530     |
| 11 | ((Lafora or Unverricht or Landau-Kleffner or Lennox Gastaut) adj2 (disease* or syndrome* or disorder* or seizure*)).tw,kf. | 2534    |
| 12 | or/4-11                                                                                                                    | 244612  |
| 13 | exp Algorithms/                                                                                                            | 375058  |
| 14 | Machine learning.tw,kf.                                                                                                    | 54804   |
| 15 | ((Deep or hierarchical) adj1 learning).tw,kf.                                                                              | 25347   |
| 16 | ((transfer* or representation* or network*) adj2 learning).tw,kf.                                                          | 7945    |
| 17 | ((artificial or machine or computer or computational) adj2 intelligence).tw,kf.                                            | 19275   |
| 18 | algorithm*.tw,kf.                                                                                                          | 299232  |
| 19 | ((data or binary or multiclass or multilabel) adj2 classification).tw,kf.                                                  | 4758    |

|    |                                                                                                                                |       |
|----|--------------------------------------------------------------------------------------------------------------------------------|-------|
| 20 | ((artificial or computational or computer* or convolutional or connectionist or mathematical) adj2 neur* network*).tw,kf.      | 28375 |
| 21 | exp Pattern Recognition, Automated/                                                                                            | 26085 |
| 22 | (Automat* adj2 pattern* adj2 recognition*).tw,kf.                                                                              | 155   |
| 23 | (Back* propagation* or backpropagation*).tw,kf.                                                                                | 4397  |
| 24 | exp Bayes Theorem/                                                                                                             | 40554 |
| 25 | (Bayes* adj2 (theorem or learning or analysis or approach* or forecast* or method* or prediction*)).tw,kf.                     | 21469 |
| 26 | (feature* adj2 (detecti* or extracti* or learning* or ranking* or selection*)).tw,kf.                                          | 21577 |
| 27 | (Fuzzy or neurofuzzy).tw,kf.                                                                                                   | 13240 |
| 28 | exp Markov chains/                                                                                                             | 15485 |
| 29 | (Markov adj2 (model* or chain\$1 or process*)).tw,kf.                                                                          | 21918 |
| 30 | K nearest neighbor*.tw,kf.                                                                                                     | 3529  |
| 31 | (Kernel\$1 adj2 (method* or algorithm* or approach or correlation or estim* or regression or model* or string or tree)).tw,kf. | 3950  |
| 32 | exp Knowledge discovery/                                                                                                       | 130   |
| 33 | (Knowledge adj2 discover*).tw,kf.                                                                                              | 1589  |
| 34 | exp Multifactor Dimensionality Reduction/                                                                                      | 226   |
| 35 | Dimensionality reduction*.tw,kf.                                                                                               | 3836  |
| 36 | (predicti* adj2 model*).tw,kf.                                                                                                 | 79862 |
| 37 | connectom*.tw,kf.                                                                                                              | 4980  |
| 38 | neur* decod*.tw,kf.                                                                                                            | 361   |
| 39 | (outlier* adj2 detection*).tw,kf.                                                                                              | 893   |
| 40 | Neural networks, computer/                                                                                                     | 35265 |
| 41 | (neural adj2 network*).tw,kf.                                                                                                  | 70371 |
| 42 | perceptron*.tw,kf.                                                                                                             | 3390  |
| 43 | radial basis function*.tw,kf.                                                                                                  | 2359  |
| 44 | random forest*.tw,kf.                                                                                                          | 13717 |

|    |                                                                                                        |       |
|----|--------------------------------------------------------------------------------------------------------|-------|
| 45 | recursive feature* elimination*.tw,kf.                                                                 | 688   |
| 46 | recursive partition*.tw,kf.                                                                            | 2380  |
| 47 | exp Support Vector Machine/                                                                            | 8553  |
| 48 | (vector* adj2 (machine* or classifi* or network* or regression)).tw,kf.                                | 22248 |
| 49 | support vector*.tw,kf.                                                                                 | 21483 |
| 50 | rough set*.tw,kf.                                                                                      | 397   |
| 51 | ((automat* or electron* or comput* or information or analytic*) adj2 (processing or reasoning)).tw,kf. | 38719 |
| 52 | (quantitative adj2 analys*).tw,kf.                                                                     | 90324 |
| 53 | (Peak* adj2 (alpha* or frequenc*)).tw,kf.                                                              | 5453  |
| 54 | Entrop*.tw,kf.                                                                                         | 45494 |
| 55 | Lyapunov exponent*.tw,kf.                                                                              | 2179  |
| 56 | Hjorth*.tw,kf.                                                                                         | 184   |
| 57 | Sub-band energ*.tw,kf.                                                                                 | 18    |
| 58 | exp fourier Analysis/                                                                                  | 17272 |
| 59 | (Fourier* or (cyclic adj2 (analys* or series or transform* or approach*)) or FFT).tw,kf.               | 87439 |
| 60 | (Hilbert* adj2 transform*).tw,kf.                                                                      | 1008  |
| 61 | (dimension* adj2 (fractal* or correlation*)).tw,kf.                                                    | 8106  |
| 62 | (Hurst adj2 exponent*).tw,kf.                                                                          | 575   |
| 63 | exp wavelet analysis/                                                                                  | 2541  |
| 64 | (Wavelet* adj2 (analysis or processing or transform*)).tw,kf.                                          | 7248  |
| 65 | phase locking value*.tw,kf.                                                                            | 311   |
| 66 | Fisher information*.tw,kf.                                                                             | 870   |
| 67 | Dynamic network*.tw,kf.                                                                                | 1839  |
| 68 | Principal component* analys*.tw,kf.                                                                    | 47819 |
| 69 | Independant component* analys*.tw,kf.                                                                  | 2     |
| 70 | Functional connectivit*.tw,kf.                                                                         | 22171 |

|    |                                                                                                                                                                                                                                                                                                                     |          |
|----|---------------------------------------------------------------------------------------------------------------------------------------------------------------------------------------------------------------------------------------------------------------------------------------------------------------------|----------|
| 71 | (gradient* boost* or Adaboost*).tw,kf.                                                                                                                                                                                                                                                                              | 3337     |
| 72 | (QEEG or Quantitative Electroencephalogra*).tw,kf.                                                                                                                                                                                                                                                                  | 1750     |
| 73 | (chaotic feature* or chaos).tw,kf.                                                                                                                                                                                                                                                                                  | 9755     |
| 74 | comput*.tw,kf.                                                                                                                                                                                                                                                                                                      | 958508   |
| 75 | quantitative.tw,kf.                                                                                                                                                                                                                                                                                                 | 689806   |
| 76 | or/13-75                                                                                                                                                                                                                                                                                                            | 2378446  |
| 77 | (sensitiv* or diagnos* or predict*).mp. or scor*.tw. or observ*.mp.                                                                                                                                                                                                                                                 | 11325259 |
| 78 | di.fs.                                                                                                                                                                                                                                                                                                              | 2760821  |
| 79 | or/77-78                                                                                                                                                                                                                                                                                                            | 11325259 |
| 80 | 3 and 12 and 76 and 79                                                                                                                                                                                                                                                                                              | 5990     |
| 81 | (Animals/ or Models, animal/ or Disease models, animal/) not Humans/                                                                                                                                                                                                                                                | 4900078  |
| 82 | ((animal or animals or canine* or cat or cats or dog or dogs or feline or hamster* or lamb or lambs or mice or monkey or monkeys or mouse or murine or pig or pigs or piglet* or porcine or primate* or rabbit* or rats or rat or rodent* or sheep* or veterinar*) not (human* or patient* or women or men)).tw,kf. | 3315730  |
| 83 | 81 or 82                                                                                                                                                                                                                                                                                                            | 5542727  |
| 84 | 80 not 83                                                                                                                                                                                                                                                                                                           | 5627     |
| 85 | limit 84 to yr="1961 -Current"                                                                                                                                                                                                                                                                                      | 5627     |

## EMBASE [OVID]

Embase <1974 to 2021 December 13>

| # | Searches                                                                              | Results |
|---|---------------------------------------------------------------------------------------|---------|
| 1 | exp electroencephalography/                                                           | 124495  |
| 2 | (EEG* or Electroencephalograph* or "electr* encephalograph*" or "brain wave*").tw,kf. | 146325  |
| 3 | 1 or 2                                                                                | 206929  |
| 4 | exp epilepsy/                                                                         | 251058  |
| 5 | Epilep*.tw,kf.                                                                        | 214171  |
| 6 | (seizure* or convulsion* or infantile spasm*).tw,kf.                                  | 216888  |
| 7 | (BCECTS or BECTS).tw,kf.                                                              | 509     |

|    |                                                                                                                              |        |
|----|------------------------------------------------------------------------------------------------------------------------------|--------|
| 8  | (panayiotopoulos adj2 syndrome*).tw,kf.                                                                                      | 249    |
| 9  | ((Nodding or dravet or doose or may white or fukhura) adj2 (disease* or syndrome*)).tw,kf.                                   | 2324   |
| 10 | (myoencephalopathy ragged red fiber* disease* or MERRF).tw,kf.                                                               | 711    |
| 11 | ((Lafora or Unverricht or Landau-Kleffner or Lennox Gastaut) adj2 (disease* or syndrome* or disorder* or seizure*)).tw,kf.   | 3984   |
| 12 | or/4-11                                                                                                                      | 371364 |
| 13 | Machine learning/                                                                                                            | 49774  |
| 14 | Machine learning.tw,kf.                                                                                                      | 63858  |
| 15 | ((Deep or hierarchical) adj1 learning).tw,kf.                                                                                | 28566  |
| 16 | exp network learning/                                                                                                        | 886    |
| 17 | ((transfer* or representation* or network*) adj2 learning).tw,kf.                                                            | 8790   |
| 18 | exp artificial intelligence/                                                                                                 | 55153  |
| 19 | ((artificial or machine or computer or computational) adj2 intelligence).tw,kf.                                              | 23056  |
| 20 | exp algorithm/                                                                                                               | 465121 |
| 21 | algorithm*.tw,kf.                                                                                                            | 381089 |
| 22 | ((data or binary or multiclass or multilabel) adj2 classification).tw,kf.                                                    | 6087   |
| 23 | exp artificial neural network/                                                                                               | 62826  |
| 24 | ((artificial or computational or computer* or convolutional or connectionist or mathematical) adj2 neur* network*).tw,kf.    | 33889  |
| 25 | exp pattern recognition/ or exp automated pattern recognition/                                                               | 68427  |
| 26 | (Automat* adj2 pattern* adj2 recognition*).tw,kf.                                                                            | 199    |
| 27 | exp back propagation/                                                                                                        | 2553   |
| 28 | (Back* propagation* or backpropagation*).tw,kf.                                                                              | 5107   |
| 29 | exp Bayesian learning/                                                                                                       | 4303   |
| 30 | (Bayes* adj2 (theorem or learning or analysis or approach* or forecast* or method* or prediction*)).tw,kf.                   | 24116  |
| 31 | exp Feature detection/ or exp feature extraction/ or exp feature learning/ or exp feature ranking/ or exp feature selection/ | 31030  |

|    |                                                                                                                                |        |
|----|--------------------------------------------------------------------------------------------------------------------------------|--------|
| 32 | ((feature* or representation) adj2 (detecti* or extracti* or learning* or ranking* or selection*)).tw,kf.                      | 28097  |
| 33 | exp fuzzy system/                                                                                                              | 4077   |
| 34 | (fuzzy or neurofuzzy).tw,kf.                                                                                                   | 16138  |
| 35 | exp Markov chain/ or exp Markov state model/                                                                                   | 12093  |
| 36 | (Markov adj2 (model* or chain\$1 or process*)).tw,kf.                                                                          | 29000  |
| 37 | exp k nearest neighbor/                                                                                                        | 4553   |
| 38 | K nearest neighbor*.tw,kf.                                                                                                     | 4260   |
| 39 | kernel method/                                                                                                                 | 6720   |
| 40 | (Kernel\$1 adj2 (method* or algorithm* or approach or correlation or estim* or regression or model* or string or tree)).tw,kf. | 4389   |
| 41 | exp Knowledge discovery/                                                                                                       | 727    |
| 42 | (Knowledge adj2 discover*).tw,kf.                                                                                              | 1804   |
| 43 | exp multifactor dimensionality reduction/                                                                                      | 864    |
| 44 | Dimension* reduction*.tw,kf.                                                                                                   | 7086   |
| 45 | (predicti* adj2 model*).tw,kf.                                                                                                 | 105404 |
| 46 | connectom*.tw,kf.                                                                                                              | 6225   |
| 47 | neur* decod*.tw,kf.                                                                                                            | 433    |
| 48 | exp Outlier detection/                                                                                                         | 470    |
| 49 | (outlier* adj2 detection*).tw,kf.                                                                                              | 1010   |
| 50 | exp artificial neural network/                                                                                                 | 62826  |
| 51 | exp Perceptron/                                                                                                                | 2478   |
| 52 | perceptron*.tw,kf.                                                                                                             | 3962   |
| 53 | (neural adj2 network*).tw,kf.                                                                                                  | 84786  |
| 54 | exp radial basis function/                                                                                                     | 942    |
| 55 | radial bas* function*.tw,kf.                                                                                                   | 2927   |
| 56 | exp random forest/                                                                                                             | 14358  |
| 57 | (random adj2 forest*).tw,kf.                                                                                                   | 17752  |

|    |                                                                                                        |        |
|----|--------------------------------------------------------------------------------------------------------|--------|
| 58 | exp recursive feature elimination/                                                                     | 393    |
| 59 | recursive feature* elimination*.tw,kf.                                                                 | 860    |
| 60 | exp recursive partitioning/                                                                            | 462    |
| 61 | recursive partition*.tw,kf.                                                                            | 3567   |
| 62 | exp relevance vector machine/ or exp support vector machine/                                           | 28522  |
| 63 | (vector* adj2 (machine* or classifi* or network* or regression)).tw,kf.                                | 27021  |
| 64 | support vector*.tw,kf.                                                                                 | 26266  |
| 65 | exp rough set/                                                                                         | 248    |
| 66 | rough set*.tw,kf.                                                                                      | 531    |
| 67 | exp online analytical processing/                                                                      | 187    |
| 68 | ((automat* or electron* or comput* or information or analytic*) adj2 (processing or reasoning)).tw,kf. | 44254  |
| 69 | Quantitative analysis/                                                                                 | 367570 |
| 70 | (quantitative adj2 analys*).tw,kf.                                                                     | 113093 |
| 71 | (Peak* adj2 (alpha* or frequenc*)).tw,kf.                                                              | 6315   |
| 72 | Entrop*.tw,kf.                                                                                         | 43483  |
| 73 | Lyapunov exponent*.tw,kf.                                                                              | 1600   |
| 74 | Hjorth*.tw,kf.                                                                                         | 264    |
| 75 | Sub-band energ*.tw,kf.                                                                                 | 23     |
| 76 | exp Fourier analysis/                                                                                  | 10056  |
| 77 | (Fourier* or (cyclic adj2 (analys* or series or transform* or approach*)) or FFT).tw,kf.               | 89584  |
| 78 | Hilbert transform/                                                                                     | 183    |
| 79 | (Hilbert* adj2 transform*).tw,kf.                                                                      | 1253   |
| 80 | (dimension* adj2 (fractal* or correlation*)).tw,kf.                                                    | 8947   |
| 81 | (Hurst adj2 exponent*).tw,kf.                                                                          | 555    |
| 82 | exp wavelet transform/                                                                                 | 2217   |
| 83 | (Wavelet* adj2 (analysis or processing or transform*)).tw,kf.                                          | 9182   |

|     |                                                                                                                                                                                                                                                                                             |          |
|-----|---------------------------------------------------------------------------------------------------------------------------------------------------------------------------------------------------------------------------------------------------------------------------------------------|----------|
| 84  | phase locking value*.tw,kf.                                                                                                                                                                                                                                                                 | 425      |
| 85  | Fisher information*.tw,kf.                                                                                                                                                                                                                                                                  | 746      |
| 86  | Dynamic network*.tw,kf.                                                                                                                                                                                                                                                                     | 1972     |
| 87  | Principal component* analys*.tw,kf.                                                                                                                                                                                                                                                         | 58526    |
| 88  | Independent component* analys*.tw,kf.                                                                                                                                                                                                                                                       | 7493     |
| 89  | Functional connectivity/                                                                                                                                                                                                                                                                    | 21903    |
| 90  | Functional connectivit*.tw,kf.                                                                                                                                                                                                                                                              | 30389    |
| 91  | (gradient* boost* or Adaboost*).tw,kf.                                                                                                                                                                                                                                                      | 4097     |
| 92  | (QEEG or Quantitative Electroencephalogra*).tw,kf.                                                                                                                                                                                                                                          | 2861     |
| 93  | (chaotic feature* or chaos).tw,kf.                                                                                                                                                                                                                                                          | 8412     |
| 94  | comput*.tw,kf.                                                                                                                                                                                                                                                                              | 1156500  |
| 95  | quantitative.tw,kf.                                                                                                                                                                                                                                                                         | 852081   |
| 96  | or/13-95                                                                                                                                                                                                                                                                                    | 2994032  |
| 97  | (sensitiv* or diagnos* or predict*).mp. or scor*.tw. or observ*.mp.                                                                                                                                                                                                                         | 14413096 |
| 98  | di.fs.                                                                                                                                                                                                                                                                                      | 3343316  |
| 99  | or/97-98                                                                                                                                                                                                                                                                                    | 14413096 |
| 100 | 3 and 12 and 96 and 99                                                                                                                                                                                                                                                                      | 8362     |
| 101 | (exp animal/ or animal experiment/ or nonhuman/) not (exp human/ or human experiment/)                                                                                                                                                                                                      | 6801969  |
| 102 | (animal or animals or canine* or dog or dogs or feline or hamster* or lamb or lambs or mice or monkey ormonkeys or mouse or murine or pig or pigs or piglet* or porcine or primate* or rabbit* or rats or rat or rodent* or sheep* or veterinar*).ti,kw,dq,jx. not (human* or patient*).mp. | 2062187  |
| 103 | 101 or 102                                                                                                                                                                                                                                                                                  | 6872024  |
| 104 | 100 not 103                                                                                                                                                                                                                                                                                 | 7906     |
| 105 | limit 104 to yr="1961 -Current"                                                                                                                                                                                                                                                             | 7890     |
| 106 | limit 105 to embase                                                                                                                                                                                                                                                                         | 5134     |



## EBM Reviews [OVID]

All EBM Reviews - Cochrane DSR, ACP Journal Club, DARE, CCA, CCTR, CMR, HTA, and NHSEED  
<executed on December 14>

| #  | Searches                                                                                                                      | Results |
|----|-------------------------------------------------------------------------------------------------------------------------------|---------|
| 1  | (EEG* or Electroencephalograph* or "electr* encephalograph*" or "brain wave*").tw,kw,sh.                                      | 12245   |
| 2  | Epilep*.tw,kw,sh.                                                                                                             | 10099   |
| 3  | (seizure* or convulsion* or infantile spasm*).tw,kw,sh.                                                                       | 11675   |
| 4  | (BCECTS or BECTS).tw,kw,sh.                                                                                                   | 31      |
| 5  | (panayiotopoulos adj2 syndrome*).tw,kw,sh.                                                                                    | 5       |
| 6  | ((Nodding or dravet or doose or may white or fukhura) adj2 (disease* or syndrome*)).tw,kw,sh.                                 | 413     |
| 7  | (myoencephalopathy ragged red fiber* disease* or MERRF).tw,kw,sh.                                                             | 5       |
| 8  | ((Lafora or Unverricht or Landau-Kleffner or Lennox Gastaut) adj2 (disease* or syndrome* or disorder* or seizure*)).tw,kw,sh. | 339     |
| 9  | or/2-8                                                                                                                        | 16595   |
| 10 | algorithm*.tw,kw.                                                                                                             | 16401   |
| 11 | Machine learning.tw,kw,sh.                                                                                                    | 1918    |
| 12 | ((Deep or hierarchical) adj1 learning).tw,kw,sh.                                                                              | 708     |
| 13 | ((transfer* or representation* or network*) adj2 learning).tw,kw,sh.                                                          | 691     |
| 14 | ((artificial or machine or computer or computational) adj2 intelligence).tw,kw,sh.                                            | 827     |
| 15 | algorithm*.tw,kw,sh.                                                                                                          | 18549   |
| 16 | ((data or binary or multiclass or multilabel) adj2 classification).tw,kw,sh.                                                  | 335     |
| 17 | ((artificial or computational or computer* or connectionist or convolutional or mathematical) adj2 neur* network*).tw,kw,sh.  | 782     |
| 18 | (Automat* adj2 pattern* adj2 recognition*).tw,kw,sh.                                                                          | 15      |
| 19 | (Back* propagation* or backpropagation*).tw,kw,sh.                                                                            | 66      |
| 20 | (Bayes* adj2 (theorem or learning or analysis or approach* or forecast* or method* or prediction*)).tw,kw,sh.                 | 1841    |
| 21 | (feature* adj2 (detecti* or extracti* or learning* or ranking* or selection*)).tw,kw,sh.                                      | 607     |

|    |                                                                                                                                   |      |
|----|-----------------------------------------------------------------------------------------------------------------------------------|------|
| 22 | (fuzzy or neurofuzzy).tw,kw,sh.                                                                                                   | 197  |
| 23 | (Markov adj2 (model* or chain\$1 or process*)).tw,kw,sh.                                                                          | 4373 |
| 24 | K nearest neighbor*.tw,kw,sh.                                                                                                     | 73   |
| 25 | (Kernel\$1 adj2 (method* or algorithm* or approach or correlation or estim* or regression or model* or string or tree)).tw,kw,sh. | 90   |
| 26 | (Knowledge adj2 discover*).tw,kw,sh.                                                                                              | 26   |
| 27 | Dimensionality reduction*.tw,kw,sh.                                                                                               | 73   |
| 28 | (predicti* adj2 model*).tw,kw,sh.                                                                                                 | 5378 |
| 29 | connectom*.tw,kw,sh.                                                                                                              | 308  |
| 30 | neur* decod*.tw,kw,sh.                                                                                                            | 2    |
| 31 | (outlier* adj2 detection*).tw,kw,sh.                                                                                              | 14   |
| 32 | perceptron*.tw,kw,sh.                                                                                                             | 76   |
| 33 | (neural adj2 network*).tw,kw,sh.                                                                                                  | 1672 |
| 34 | radial basis function*.tw,kw,sh.                                                                                                  | 39   |
| 35 | random forest*.tw,kw,sh.                                                                                                          | 615  |
| 36 | recursive feature* elimination*.tw,kw,sh.                                                                                         | 30   |
| 37 | recursive partition*.tw,kw,sh.                                                                                                    | 282  |
| 38 | (vector* adj2 (machine* or classifi* or network* or regression)).tw,kw,sh.                                                        | 555  |
| 39 | support vector*.tw,kw,sh.                                                                                                         | 544  |
| 40 | rough set*.tw,kw,sh.                                                                                                              | 3    |
| 41 | ((automat* or electron* or comput* or information or analytic*) adj2 (processing or reasoning)).tw,kw,sh.                         | 7510 |
| 42 | (quantitative adj2 analys*).tw,kw,sh.                                                                                             | 8960 |
| 43 | (Peak* adj2 (alpha* or frequenc*)).tw,kw,sh.                                                                                      | 357  |
| 44 | Entrop*.tw,kw,sh.                                                                                                                 | 951  |
| 45 | Lyapunov exponent*.tw,kw,sh.                                                                                                      | 37   |
| 46 | Hjorth*.tw,kw,sh.                                                                                                                 | 29   |
| 47 | Sub-band energ*.tw,kw,sh.                                                                                                         | 0    |

|    |                                                                                                                                                                                                                                                                                                                        |        |
|----|------------------------------------------------------------------------------------------------------------------------------------------------------------------------------------------------------------------------------------------------------------------------------------------------------------------------|--------|
| 48 | (Fourier* or (cyclic adj2 (analys* or series or transform* or approach*)) or FFT).tw,kw,sh.                                                                                                                                                                                                                            | 1043   |
| 49 | (Hilbert* adj2 transform*).tw,kw,sh.                                                                                                                                                                                                                                                                                   | 19     |
| 50 | (dimension* adj2 (fractal* or correlation*)).tw,kw,sh.                                                                                                                                                                                                                                                                 | 184    |
| 51 | (Hurst adj2 exponent*).tw,kw,sh.                                                                                                                                                                                                                                                                                       | 14     |
| 52 | (Wavelet* adj2 (analysis or processing or transform*)).tw,kw,sh.                                                                                                                                                                                                                                                       | 126    |
| 53 | phase locking value*.tw,kw,sh.                                                                                                                                                                                                                                                                                         | 11     |
| 54 | Fisher information*.tw,kw,sh.                                                                                                                                                                                                                                                                                          | 7      |
| 55 | Dynamic network*.tw,kw,sh.                                                                                                                                                                                                                                                                                             | 12     |
| 56 | Principal component* analys*.tw,kw,sh.                                                                                                                                                                                                                                                                                 | 1207   |
| 57 | Independant component* analys*.tw,kw,sh.                                                                                                                                                                                                                                                                               | 0      |
| 58 | Functional connectivit*.tw,kw,sh.                                                                                                                                                                                                                                                                                      | 2220   |
| 59 | (gradient* boost* or Adaboost*).tw,kw,sh.                                                                                                                                                                                                                                                                              | 168    |
| 60 | (QEEG or Quantitative Electroencephalogra*).tw,kw,sh.                                                                                                                                                                                                                                                                  | 448    |
| 61 | (chaotic feature* or chaos).tw,kw,sh.                                                                                                                                                                                                                                                                                  | 141    |
| 62 | comput*.tw,kw,sh.                                                                                                                                                                                                                                                                                                      | 80820  |
| 63 | quantitative.tw,kw,sh.                                                                                                                                                                                                                                                                                                 | 33706  |
| 64 | or/10-63                                                                                                                                                                                                                                                                                                               | 145496 |
| 65 | (sensitiv* or diagnos* or predict*).mp. or scor*.tw. or observ*.mp.                                                                                                                                                                                                                                                    | 810011 |
| 66 | di.tw,kw,sh.                                                                                                                                                                                                                                                                                                           | 17162  |
| 67 | 65 or 66                                                                                                                                                                                                                                                                                                               | 811399 |
| 68 | 1 and 9 and 64 and 67                                                                                                                                                                                                                                                                                                  | 350    |
| 69 | ((animal or animals or canine* or cat or cats or dog or dogs or feline or hamster* or lamb or lambs or mice or monkey or monkeys or mouse or murine or pig or pigs or piglet* or porcine or primate* or rabbit* or rats or rat or rodent* or sheep* or veterinar*) not (human* or patient* or women or men)).tw,kw,sh. | 5147   |
| 70 | 68 not 69                                                                                                                                                                                                                                                                                                              | 346    |
| 71 | limit 70 to yr="1961 -Current" [Limit not valid in DARE; records were retained]                                                                                                                                                                                                                                        | 321    |
| 72 | remove duplicates from 71                                                                                                                                                                                                                                                                                              | 315    |

## IEEE Xplore

<executed on December 14>

|                                                                                                                                                                                                                                                                                                                                                                                                                                                                                                                                                                                                                                                                                                                                                                                                                                                                                                                                                                                                                                                                                                                                                                                                                                                                                                                                                                                                                                                                                                                                                                                |      |
|--------------------------------------------------------------------------------------------------------------------------------------------------------------------------------------------------------------------------------------------------------------------------------------------------------------------------------------------------------------------------------------------------------------------------------------------------------------------------------------------------------------------------------------------------------------------------------------------------------------------------------------------------------------------------------------------------------------------------------------------------------------------------------------------------------------------------------------------------------------------------------------------------------------------------------------------------------------------------------------------------------------------------------------------------------------------------------------------------------------------------------------------------------------------------------------------------------------------------------------------------------------------------------------------------------------------------------------------------------------------------------------------------------------------------------------------------------------------------------------------------------------------------------------------------------------------------------|------|
| <p>(((((All Metadata:predicted OR All Metadata:prediction OR All Metadata:predictions OR All Metadata:predicting OR All Metadata:predictive OR All Metadata:predictor OR All Metadata:predictors OR All Metadata:predicts OR All Metadata:predictability OR All Metadata:predictable OR All Metadata:predictably OR All Metadata:predictively OR All Metadata:predictiveness))) OR ((All Metadata:sensitivity OR All Metadata:sensitively OR All Metadata:sensitiveness OR All Metadata:sensitive OR All Metadata:sensitivities))) OR ((All Metadata:diagnose OR All Metadata:diagnosis OR All Metadata:diagnosed OR All Metadata:diagnoses OR All Metadata:diagnostic OR All Metadata:diagnosing OR All Metadata:diagnosable OR All Metadata:diagnostics OR All Metadata:diagnoseable OR All Metadata:diagnostical OR All Metadata:diagnostician OR All Metadata:diagnosticians OR All Metadata:diagnostically))) AND ((No Keywords Specified))) AND ((No Keywords Specified))) AND ((Index Terms:EEG ) OR (Index Terms:Electroencephalograph*) OR (Index Terms: "electr* encephalograph*") OR (Index Terms: "brain wave") OR (Index Terms:"brain waves"))) OR ((Document Title:EEG) OR (Document Title:Electroencephalograph*) OR (Document Title:"electr* encephalograph*") OR (Document Title:"brain wave") OR (Document Title:"brain waves"))) AND ((Index Terms:epilep*) OR (Document Title:seizure OR Document Title:seizures OR Document Title:convulsion OR Document Title:convulsions OR Document Title:"infantile spasm" OR Document Title:"infantile spasms"))</p> | 2492 |
|--------------------------------------------------------------------------------------------------------------------------------------------------------------------------------------------------------------------------------------------------------------------------------------------------------------------------------------------------------------------------------------------------------------------------------------------------------------------------------------------------------------------------------------------------------------------------------------------------------------------------------------------------------------------------------------------------------------------------------------------------------------------------------------------------------------------------------------------------------------------------------------------------------------------------------------------------------------------------------------------------------------------------------------------------------------------------------------------------------------------------------------------------------------------------------------------------------------------------------------------------------------------------------------------------------------------------------------------------------------------------------------------------------------------------------------------------------------------------------------------------------------------------------------------------------------------------------|------|

## Google Scholar (using Publish or Perish)

<executed on December 21>

|                                                                                          |                                |
|------------------------------------------------------------------------------------------|--------------------------------|
| Electroencephalogram epilepsy [title], machine learning algorithm* diagnos* [keywords]   | 32 selected articles out of 32 |
| Electroencephalography epilepsy [title], machine learning algorithm* diagnos* [keywords] | 21 selected article out of 21  |
| EEG epilepsy [title], machine learning algorithm* diagnos* [keywords]                    | 433 sur 433                    |

## Grey literature

### Alberta: Health evidence reviews

<https://www.alberta.ca/health-evidence-reviews.aspx>

|                        |                              |
|------------------------|------------------------------|
| Electroencephalography | 0 selected articles out of 1 |
| EEG                    | 0 selected articles out of 3 |

### Canadian Agency for Drug and Technologies in Health

<https://www.cadth.ca/search?keywords>

|                        |                              |
|------------------------|------------------------------|
| Electroencephalography | 0 selected articles out of 1 |
| EEG                    | 0 selected articles out of 4 |

### Health Quality Council of Alberta

<https://hqca.ca/studies-and-reviews/>

|                        |                              |
|------------------------|------------------------------|
| Electroencephalography | 0 selected articles out of 0 |
| EEG                    | 0 selected articles out of 0 |

### Health Quality Ontario: Health Technology Assessment

Quality Standards - Health Quality Ontario (HQO) ([hqo.onario.ca](http://hqo.onario.ca))

|                        |                             |
|------------------------|-----------------------------|
| Electroencephalography | 1 selected article out of 7 |
| EEG                    | 1 selected article out of 5 |

### INESS

[https://www.inesss.qc.ca/en/publications/publications.html?tx\\_solr%5Bq%5D=EEG](https://www.inesss.qc.ca/en/publications/publications.html?tx_solr%5Bq%5D=EEG)

|                         |                              |
|-------------------------|------------------------------|
| électroencéphalographie | 0 selected articles out of 5 |
| EEG                     | 0 selected articles out of 0 |

### McGill University Health Centre (MUHC). Technology Assessment Unit Reports

<https://muhc.ca/tau/page/tau-reports>

|                        |                              |
|------------------------|------------------------------|
| Electroencephalography | 0 selected article out of 0  |
| EEG                    | 0 selected articles out of 3 |

### Newfoundland & Labrador Centre For Applied Health Research

<http://www.nlcahr.mun.ca/CHRSP/CompletedCHRSP.php>

|                                     |                               |
|-------------------------------------|-------------------------------|
| Electroencephalography AND epilepsy | 0 selected articles out of 37 |
| Electroencephalogram AND epilepsy   | 0 selected articles out of 34 |
| EEG AND epilepsy                    | 0 selected articles out of 28 |

### The Ottawa Hospital Research institute: Knowledge Synthesis Group

<http://www.ohri.ca/ksgroup/>

|                        |                              |
|------------------------|------------------------------|
| Electroencephalography | 0 selected articles out of 0 |
| Electroencephalogram   | 0 selected articles out of 0 |
| EEG AND epilepsy       | 0 selected articles out of 7 |

### Programs for Assessment of Technology in Health

<https://www.path-hta.com/research-1>

|                        |                              |
|------------------------|------------------------------|
| Electroencephalography | 0 selected articles out of 0 |
| Electroencephalogram   | 0 selected articles out of 0 |
| EEG                    | 0 selected articles out of 0 |

### The International Network of Agencies for Health Technology Assessment

#### Publications - INAHTA

|                        |                              |
|------------------------|------------------------------|
| Electroencephalography | 0 selected articles out of 1 |
| Electroencephalogram   | 0 selected articles out of 4 |
| EEG                    | 0 selected articles out of 4 |

### Horizon Scanning

#### Horizon Scanning - Australia and New Zealand Horizon Scanning Network - Technologies Assessed

|                        |                              |
|------------------------|------------------------------|
| Electroencephalography | 0 selected articles out of 1 |
| Electroencephalogram   | 0 selected articles out of 0 |
| EEG                    | 0 selected articles out of 0 |

### Austrian Academy of Sciences

<https://www.oeaw.ac.at/en/>

|                        |                              |
|------------------------|------------------------------|
| Electroencephalography | 0 selected articles out of 0 |
| Electroencephalogram   | 0 selected articles out of 0 |
| EEG                    | 0 selected articles out of 2 |

### Austrian Institute Of Health Technology Assessment

Welcome to Repository of AIHTA GmbH - Repository of AIHTA GmbH (ibg.ac.at)

|                        |                              |
|------------------------|------------------------------|
| Electroencephalography | 0 selected articles out of 4 |
| Electroencephalogram   | 0 selected articles out of 0 |

|     |                              |
|-----|------------------------------|
| EEG | 0 selected articles out of 2 |
|-----|------------------------------|

### KCE: Belgian health Knowledge Center

All reports - KCE (fgov.be)

|                         |                              |
|-------------------------|------------------------------|
| Electroencephalography  | 0 selected articles out of 1 |
| Electroencephalogram    | 0 selected articles out of 0 |
| EEG                     | 0 selected articles out of 1 |
| électroencéphalographie | 0 selected article out of 1  |

### CEDIT, the Hospital-Based HTA Agency Of AP-HP

Recommendations and Reports | Cedit (aphp.fr)

|                         |                              |
|-------------------------|------------------------------|
| Electroencephalography  | 0 selected articles out of 0 |
| Electroencephalogram    | 0 selected articles out of 0 |
| EEG                     | 0 selected articles out of 1 |
| électroencéphalographie | 0 selected article out of 0  |

### Haute Autorité de Santé

Haute Autorité de Santé - Résultat de recherche (has-sante.fr)

|                         |                               |
|-------------------------|-------------------------------|
| EEG                     | 1 selected article out of 218 |
| électroencéphalographie | 0 selected article out of 27  |

### Health Information and Quality Authority

Health Technology Assessments | HIQA

|                        |                              |
|------------------------|------------------------------|
| Electroencephalography | 0 selected articles out of 0 |
| Electroencephalogram   | 0 selected articles out of 0 |
| EEG                    | 0 selected articles out of 0 |

### Irish Health Repository

Lenus the Irish Health Repository

|                                            |                               |
|--------------------------------------------|-------------------------------|
| Title: Electroencephalography AND epilepsy | 1 selected article out of 51  |
| Electroencephalogram                       | 0 selected articles out of 3  |
| Title: EEG AND epilepsy                    | 0 selected articles out of 51 |

### Norwegian Institute of Public Health

**Norwegian Institute of Public Health - NIPH (fhi.no)**

|                        |                              |
|------------------------|------------------------------|
| Electroencephalography | 0 selected articles out of 0 |
| Electroencephalogram   | 0 selected articles out of 0 |
| EEG                    | 0 selected articles out of 3 |

**Swedish Agency for Health Technology Assessment And Assessment Of Social Services****Home (sbu.se)**

|                        |                              |
|------------------------|------------------------------|
| Electroencephalography | 0 selected articles out of 2 |
| Electroencephalogram   | 0 selected articles out of 2 |
| EEG                    | 0 selected articles out of 4 |

**Healthcare Improvement Scotland****Healthcare Improvement Scotland**

|                        |                              |
|------------------------|------------------------------|
| Electroencephalography | 0 selected articles out of 0 |
| Electroencephalogram   | 0 selected articles out of 0 |
| EEG                    | 0 selected articles out of 0 |

**National Institute for Health and Care Excellence****NICE | The National Institute for Health and Care Excellence**

|                                     |                              |
|-------------------------------------|------------------------------|
| electroencephalography AND epilepsy | 0 selected articles out of 2 |
| Electroencephalogram AND epilepsy   | 1 selected article out of 5  |
| EEG                                 | 0 selected articles out of 9 |

**NIHR Innovation Observatory****Innovation Observatory | Next generation search tools for the next generation. (nihr.ac.uk)**

|                        |                              |
|------------------------|------------------------------|
| Electroencephalography | 1 selected article out of 2  |
| Electroencephalogram   | 0 selected articles out of 1 |
| EEG                    | 0 selected articles out of 5 |

**National institute for health Research****Research Programmes (nihr.ac.uk)**

|                                     |                               |
|-------------------------------------|-------------------------------|
| electroencephalography AND epilepsy | 1 selected article out of 67  |
| Electroencephalogram AND epilepsy   | 0 selected articles out of 67 |
| EEG                                 | 0 selected articles out of 67 |



**Agency for Healthcare Research and Quality : Technology Assessment Program**

**Technology Assessment Program | Agency for Healthcare Research and Quality (ahrq.gov)**

|                                                   |                               |
|---------------------------------------------------|-------------------------------|
| Electroencephalography AND epilepsy AND diagnosis | 0 selected articles out of 1  |
| Electroencephalogram AND epilepsy AND diagnosis   | 0 selected articles out of 78 |
| EEG AND epilepsy AND diagnosis                    | 0 selected articles out of 83 |

**Agency for Healthcare Research and Quality : Evidence-Based Reports**

**Search Evidence-Based Reports | Agency for Healthcare Research and Quality (ahrq.gov)**

|                        |                              |
|------------------------|------------------------------|
| Electroencephalography | 0 selected articles out of 0 |
| Electroencephalogram   | 0 selected articles out of 0 |
| EEG AND epilepsy       | 0 selected articles out of 4 |

**Google**

|                                                                                 |                              |
|---------------------------------------------------------------------------------|------------------------------|
| intitle: Electroencephalography AND epilepsy AND machine learning AND diagnosis | 3 selected articles out of 9 |
| intitle: Electroencephalogram AND epilepsy AND machine learning AND diagnosis   | 0 selected articles out of 9 |
| intitle: EEG AND epilepsy AND machine learning AND diagnosis                    | 1 selected articles out of 9 |
| intitle: Electroencephalography AND epilepsy AND algorithm AND diagnosis        | 0 selected articles out of 9 |
| intitle: Electroencephalogram AND epilepsy AND algorithm AND diagnosis          | 0 selected articles out of 9 |
| intitle: EEG AND epilepsy AND algorithm AND diagnosis                           | 0 selected articles out of 9 |

## PRISMA-P 2015 Checklist

This checklist has been adapted for use with protocol submissions to *Systematic Reviews* from Table 3 in Moher D et al: Preferred reporting items for systematic review and meta-analysis protocols (PRISMA-P) 2015 statement. *Systematic Reviews* 2015 4:1

| Section/topic                     | #  | Checklist item                                                                                                                                                                                  | Information reported                |                          | Line number(s) |
|-----------------------------------|----|-------------------------------------------------------------------------------------------------------------------------------------------------------------------------------------------------|-------------------------------------|--------------------------|----------------|
|                                   |    |                                                                                                                                                                                                 | Yes                                 | No                       |                |
| <b>ADMINISTRATIVE INFORMATION</b> |    |                                                                                                                                                                                                 |                                     |                          |                |
| <b>Title</b>                      |    |                                                                                                                                                                                                 |                                     |                          |                |
| Identification                    | 1a | Identify the report as a protocol of a systematic review                                                                                                                                        | <input checked="" type="checkbox"/> | <input type="checkbox"/> | Title page     |
| Update                            | 1b | If the protocol is for an update of a previous systematic review, identify as such                                                                                                              | <input type="checkbox"/>            | <input type="checkbox"/> | NA             |
| <b>Registration</b>               | 2  | If registered, provide the name of the registry (e.g., PROSPERO) and registration number in the Abstract                                                                                        | <input type="checkbox"/>            | <input type="checkbox"/> | 24             |
| <b>Authors</b>                    |    |                                                                                                                                                                                                 |                                     |                          |                |
| Contact                           | 3a | Provide name, institutional affiliation, and e-mail address of all protocol authors; provide physical mailing address of corresponding author                                                   | <input checked="" type="checkbox"/> | <input type="checkbox"/> | Title page     |
| Contributions                     | 3b | Describe contributions of protocol authors and identify the guarantor of the review                                                                                                             | <input checked="" type="checkbox"/> | <input type="checkbox"/> | 265 – 270      |
| <b>Amendments</b>                 | 4  | If the protocol represents an amendment of a previously completed or published protocol, identify as such and list changes; otherwise, state plan for documenting important protocol amendments | <input type="checkbox"/>            | <input type="checkbox"/> | NA             |
| <b>Support</b>                    |    |                                                                                                                                                                                                 |                                     |                          |                |
| Sources                           | 5a | Indicate sources of financial or other support for the review                                                                                                                                   | <input checked="" type="checkbox"/> | <input type="checkbox"/> | 265 – 270      |
| Sponsor                           | 5b | Provide name for the review funder and/or sponsor                                                                                                                                               | <input checked="" type="checkbox"/> | <input type="checkbox"/> | 265 – 270      |
| Role of sponsor/funder            | 5c | Describe roles of funder(s), sponsor(s), and/or institution(s), if any, in developing the protocol                                                                                              | <input checked="" type="checkbox"/> | <input type="checkbox"/> | 265 – 270      |
| <b>INTRODUCTION</b>               |    |                                                                                                                                                                                                 |                                     |                          |                |
| <b>Rationale</b>                  | 6  | Describe the rationale for the review in the context of what is already known                                                                                                                   | <input checked="" type="checkbox"/> | <input type="checkbox"/> | 29 – 70        |
| <b>Objectives</b>                 | 7  | Provide an explicit statement of the question(s) the review will address with reference to participants, interventions, comparators, and outcomes (PICO)                                        | <input checked="" type="checkbox"/> | <input type="checkbox"/> | 71 – 75        |

| Section/topic                      | #   | Checklist item                                                                                                                                                                                                                              | Information reported                |                          | Line number(s) |
|------------------------------------|-----|---------------------------------------------------------------------------------------------------------------------------------------------------------------------------------------------------------------------------------------------|-------------------------------------|--------------------------|----------------|
|                                    |     |                                                                                                                                                                                                                                             | Yes                                 | No                       |                |
| <b>METHODS</b>                     |     |                                                                                                                                                                                                                                             |                                     |                          |                |
| Eligibility criteria               | 8   | Specify the study characteristics (e.g., PICO, study design, setting, time frame) and report characteristics (e.g., years considered, language, publication status) to be used as criteria for eligibility for the review                   | <input checked="" type="checkbox"/> | <input type="checkbox"/> | 82 – 106       |
| Information sources                | 9   | Describe all intended information sources (e.g., electronic databases, contact with study authors, trial registers, or other grey literature sources) with planned dates of coverage                                                        | <input checked="" type="checkbox"/> | <input type="checkbox"/> | 107 – 116      |
| Search strategy                    | 10  | Present draft of search strategy to be used for at least one electronic database, including planned limits, such that it could be repeated                                                                                                  | <input checked="" type="checkbox"/> | <input type="checkbox"/> | App. 1         |
| <b>STUDY RECORDS</b>               |     |                                                                                                                                                                                                                                             |                                     |                          |                |
| Data management                    | 11a | Describe the mechanism(s) that will be used to manage records and data throughout the review                                                                                                                                                | <input checked="" type="checkbox"/> | <input type="checkbox"/> | 111 – 116      |
| Selection process                  | 11b | State the process that will be used for selecting studies (e.g., two independent reviewers) through each phase of the review (i.e., screening, eligibility, and inclusion in meta-analysis)                                                 | <input checked="" type="checkbox"/> | <input type="checkbox"/> | 111 – 116      |
| Data collection process            | 11c | Describe planned method of extracting data from reports (e.g., piloting forms, done independently, in duplicate), any processes for obtaining and confirming data from investigators                                                        | <input checked="" type="checkbox"/> | <input type="checkbox"/> | 111 – 116      |
| Data items                         | 12  | List and define all variables for which data will be sought (e.g., PICO items, funding sources), any pre-planned data assumptions and simplifications                                                                                       | <input checked="" type="checkbox"/> | <input type="checkbox"/> | 118 – 154      |
| Outcomes and prioritization        | 13  | List and define all outcomes for which data will be sought, including prioritization of main and additional outcomes, with rationale                                                                                                        | <input checked="" type="checkbox"/> | <input type="checkbox"/> | 149 – 152      |
| Risk of bias in individual studies | 14  | Describe anticipated methods for assessing risk of bias of individual studies, including whether this will be done at the outcome or study level, or both; state how this information will be used in data synthesis                        | <input checked="" type="checkbox"/> | <input type="checkbox"/> | 156 – 182      |
| <b>DATA</b>                        |     |                                                                                                                                                                                                                                             |                                     |                          |                |
| Synthesis                          | 15a | Describe criteria under which study data will be quantitatively synthesized                                                                                                                                                                 | <input checked="" type="checkbox"/> | <input type="checkbox"/> | 184 – 188      |
|                                    | 15b | If data are appropriate for quantitative synthesis, describe planned summary measures, methods of handling data, and methods of combining data from studies, including any planned exploration of consistency (e.g., $I^2$ , Kendall's tau) | <input checked="" type="checkbox"/> | <input type="checkbox"/> | 198 – 221      |
|                                    | 15c | Describe any proposed additional analyses (e.g., sensitivity or subgroup analyses, meta-regression)                                                                                                                                         | <input checked="" type="checkbox"/> | <input type="checkbox"/> | 198 – 221      |
|                                    | 15d | If quantitative synthesis is not appropriate, describe the type of summary planned                                                                                                                                                          | <input checked="" type="checkbox"/> | <input type="checkbox"/> | 189 – 196      |
| Meta-bias(es)                      | 16  | Specify any planned assessment of meta-bias(es) (e.g., publication bias across studies, selective                                                                                                                                           | <input checked="" type="checkbox"/> | <input type="checkbox"/> | 220 – 227      |

1  
2  
3  
4  
5  
6  
7  
8  
9  
10  
11  
12  
13  
14  
15  
16  
17  
18  
19  
20  
21  
22  
23  
24  
25  
26  
27  
28  
29  
30  
31  
32  
33  
34  
35  
36  
37  
38  
39  
40  
41  
42  
43  
44  
45  
46

| Section/topic                            | #  | Checklist item                                                                   | Information reported     |                          | Line number(s) |
|------------------------------------------|----|----------------------------------------------------------------------------------|--------------------------|--------------------------|----------------|
|                                          |    |                                                                                  | Yes                      | No                       |                |
|                                          |    | reporting within studies)                                                        |                          |                          |                |
| <b>Confidence in cumulative evidence</b> | 17 | Describe how the strength of the body of evidence will be assessed (e.g., GRADE) | <input type="checkbox"/> | <input type="checkbox"/> | NA             |

For peer review only
