# Supplementary material for: Computer-assisted analysis of routine electroencephalogram to identify hidden biomarkers of epilepsy: protocol for a systematic review
Source: PubMed Central journal article supplement — BMJ Open. 2023 Jan 24;13(1):e066932. doi: 10.1136/bmjopen-2022-066932 (PMC9884857; doi:10.1136/bmjopen-2022-066932), 2023-01-24
Supplement: bmjopen-2022-066932supp001.pdf [file bmjopen-2022-066932supp001.pdf]

## Appendix 1: Search strategy

### Medline [OVID]

Ovid MEDLINE(R) and Epub Ahead of Print, In-Process, In-Data-Review & Other Non-Indexed Citations, Daily and Versions(R) <1946 to December 13, 2021>

| #  | Searches                                                                                                                  | Results |
|----|---------------------------------------------------------------------------------------------------------------------------|---------|
| 1  | exp Electroencephalography/                                                                                               | 173584  |
| 2  | ((EEG* or Electroencephalograph* or "electr* encephalograph*" or "brain wave*").tw,kf.                                    | 111352  |
| 3  | 1 or 2                                                                                                                    | 201652  |
| 4  | exp Epilepsy/                                                                                                             | 118716  |
| 5  | Epilep*.tw,kf.                                                                                                            | 152323  |
| 6  | (seizure* or convulsion* or infantile spasm*).tw,kf.                                                                      | 147989  |
| 7  | (BCECTS or BECTS).tw,kf.                                                                                                  | 346     |
| 8  | (panayiotopoulos adj2 syndrome*).tw,kf.                                                                                   | 166     |
| 9  | ((Nodding or dravet or doose or may white or fukhura) adj2 (disease* or syndrome*).tw,kf.                                 | 1407    |
| 10 | (myoencephalopathy ragged red fiber* disease* or MERRF).tw,kf.                                                            | 530     |
| 11 | ((Lafora or Unverricht or Landau-Kleffner or Lennox Gastaut) adj2 (disease* or syndrome* or disorder* or seizure*).tw,kf. | 2534    |
| 12 | or/4-11                                                                                                                   | 244612  |
| 13 | exp Algorithms/                                                                                                           | 375058  |
| 14 | Machine learning.tw,kf.                                                                                                   | 54804   |
| 15 | ((Deep or hierarchical) adj1 learning).tw,kf.                                                                             | 25347   |
| 16 | ((transfer* or representation* or network*) adj2 learning).tw,kf.                                                         | 7945    |
| 17 | ((artificial or machine or computer or computational) adj2 intelligence).tw,kf.                                           | 19275   |
| 18 | algorithm*.tw,kf.                                                                                                         | 299232  |
| 19 | ((data or binary or multiclass or multilabel) adj2 classification).tw,kf.                                                 | 4758    |

|    |                                                                                                                                |       |
|----|--------------------------------------------------------------------------------------------------------------------------------|-------|
| 20 | ((artificial or computational or computer* or convolutional or connectionist or mathematical) adj2 neur* network*).tw,kf.      | 28375 |
| 21 | exp Pattern Recognition, Automated/                                                                                            | 26085 |
| 22 | (Automat* adj2 pattern* adj2 recognition*).tw,kf.                                                                              | 155   |
| 23 | (Back* propagation* or backpropagation*).tw,kf.                                                                                | 4397  |
| 24 | exp Bayes Theorem/                                                                                                             | 40554 |
| 25 | (Bayes* adj2 (theorem or learning or analysis or approach* or forecast* or method* or prediction*).tw,kf.                      | 21469 |
| 26 | (feature* adj2 (detecti* or extracti* or learning* or ranking* or selection*).tw,kf.                                           | 21577 |
| 27 | (Fuzzy or neurofuzzy).tw,kf.                                                                                                   | 13240 |
| 28 | exp Markov chains/                                                                                                             | 15485 |
| 29 | (Markov adj2 (model* or chain\$1 or process*).tw,kf.                                                                           | 21918 |
| 30 | K nearest neighbor*.tw,kf.                                                                                                     | 3529  |
| 31 | (Kernel\$1 adj2 (method* or algorithm* or approach or correlation or estim* or regression or model* or string or tree)).tw,kf. | 3950  |
| 32 | exp Knowledge discovery/                                                                                                       | 130   |
| 33 | (Knowledge adj2 discover*).tw,kf.                                                                                              | 1589  |
| 34 | exp Multifactor Dimensionality Reduction/                                                                                      | 226   |
| 35 | Dimensionality reduction*.tw,kf.                                                                                               | 3836  |
| 36 | (predicti* adj2 model*).tw,kf.                                                                                                 | 79862 |
| 37 | connectom*.tw,kf.                                                                                                              | 4980  |
| 38 | neur* decod*.tw,kf.                                                                                                            | 361   |
| 39 | (outlier* adj2 detection*).tw,kf.                                                                                              | 893   |
| 40 | Neural networks, computer/                                                                                                     | 35265 |
| 41 | (neural adj2 network*).tw,kf.                                                                                                  | 70371 |
| 42 | perceptron*.tw,kf.                                                                                                             | 3390  |
| 43 | radial basis function*.tw,kf.                                                                                                  | 2359  |
| 44 | random forest*.tw,kf.                                                                                                          | 13717 |

|    |                                                                                                        |       |
|----|--------------------------------------------------------------------------------------------------------|-------|
| 45 | recursive feature* elimination*.tw,kf.                                                                 | 688   |
| 46 | recursive partition*.tw,kf.                                                                            | 2380  |
| 47 | exp Support Vector Machine/                                                                            | 8553  |
| 48 | (vector* adj2 (machine* or classifi* or network* or regression)).tw,kf.                                | 22248 |
| 49 | support vector*.tw,kf.                                                                                 | 21483 |
| 50 | rough set*.tw,kf.                                                                                      | 397   |
| 51 | ((automat* or electron* or comput* or information or analytic*) adj2 (processing or reasoning)).tw,kf. | 38719 |
| 52 | (quantitative adj2 analys*).tw,kf.                                                                     | 90324 |
| 53 | (Peak* adj2 (alpha* or frequenc*)).tw,kf.                                                              | 5453  |
| 54 | Entrop*.tw,kf.                                                                                         | 45494 |
| 55 | Lyapunov exponent*.tw,kf.                                                                              | 2179  |
| 56 | Hjorth*.tw,kf.                                                                                         | 184   |
| 57 | Sub-band energ*.tw,kf.                                                                                 | 18    |
| 58 | exp fourier Analysis/                                                                                  | 17272 |
| 59 | (Fourier* or (cyclic adj2 (analys* or series or transform* or approach*)) or FFT).tw,kf.               | 87439 |
| 60 | (Hilbert* adj2 transform*).tw,kf.                                                                      | 1008  |
| 61 | (dimension* adj2 (fractal* or correlation*)).tw,kf.                                                    | 8106  |
| 62 | (Hurst adj2 exponent*).tw,kf.                                                                          | 575   |
| 63 | exp wavelet analysis/                                                                                  | 2541  |
| 64 | (Wavelet* adj2 (analysis or processing or transform*)).tw,kf.                                          | 7248  |
| 65 | phase locking value*.tw,kf.                                                                            | 311   |
| 66 | Fisher information*.tw,kf.                                                                             | 870   |
| 67 | Dynamic network*.tw,kf.                                                                                | 1839  |
| 68 | Principal component* analys*.tw,kf.                                                                    | 47819 |
| 69 | Independant component* analys*.tw,kf.                                                                  | 2     |
| 70 | Functional connectivit*.tw,kf.                                                                         | 22171 |

|    |                                                                                                                                                                                                                                                                                                                     |          |
|----|---------------------------------------------------------------------------------------------------------------------------------------------------------------------------------------------------------------------------------------------------------------------------------------------------------------------|----------|
| 71 | (gradient* boost* or Adaboost*).tw,kf.                                                                                                                                                                                                                                                                              | 3337     |
| 72 | (QEEG or Quantitative Electroencephalogra*).tw,kf.                                                                                                                                                                                                                                                                  | 1750     |
| 73 | (chaotic feature* or chaos).tw,kf.                                                                                                                                                                                                                                                                                  | 9755     |
| 74 | comput*.tw,kf.                                                                                                                                                                                                                                                                                                      | 958508   |
| 75 | quantitative.tw,kf.                                                                                                                                                                                                                                                                                                 | 689806   |
| 76 | or/13-75                                                                                                                                                                                                                                                                                                            | 2378446  |
| 77 | (sensitiv* or diagnos* or predict*).mp. or scor*.tw. or observ*.mp.                                                                                                                                                                                                                                                 | 11325259 |
| 78 | di.fs.                                                                                                                                                                                                                                                                                                              | 2760821  |
| 79 | or/77-78                                                                                                                                                                                                                                                                                                            | 11325259 |
| 80 | 3 and 12 and 76 and 79                                                                                                                                                                                                                                                                                              | 5990     |
| 81 | (Animals/ or Models, animal/ or Disease models, animal/) not Humans/                                                                                                                                                                                                                                                | 4900078  |
| 82 | ((animal or animals or canine* or cat or cats or dog or dogs or feline or hamster* or lamb or lambs or mice or monkey or monkeys or mouse or murine or pig or pigs or piglet* or porcine or primate* or rabbit* or rats or rat or rodent* or sheep* or veterinar*) not (human* or patient* or women or men)).tw,kf. | 3315730  |
| 83 | 81 or 82                                                                                                                                                                                                                                                                                                            | 5542727  |
| 84 | 80 not 83                                                                                                                                                                                                                                                                                                           | 5627     |
| 85 | limit 84 to yr="1961 -Current"                                                                                                                                                                                                                                                                                      | 5627     |

## EMBASE [OVID]

Embase <1974 to 2021 December 13>

| # | Searches                                                                              | Results |
|---|---------------------------------------------------------------------------------------|---------|
| 1 | exp electroencephalography/                                                           | 124495  |
| 2 | (EEG* or Electroencephalograph* or "electr* encephalograph*" or "brain wave*").tw,kf. | 146325  |
| 3 | 1 or 2                                                                                | 206929  |
| 4 | exp epilepsy/                                                                         | 251058  |
| 5 | Epilep*.tw,kf.                                                                        | 214171  |
| 6 | (seizure* or convulsion* or infantile spasm*).tw,kf.                                  | 216888  |
| 7 | (BCECTS or BECTS).tw,kf.                                                              | 509     |

|    |                                                                                                                              |        |
|----|------------------------------------------------------------------------------------------------------------------------------|--------|
| 8  | (panayiotopoulos adj2 syndrome*).tw,kf.                                                                                      | 249    |
| 9  | ((Nodding or dravet or doose or may white or fukhura) adj2 (disease* or syndrome*)).tw,kf.                                   | 2324   |
| 10 | (myoencephalopathy ragged red fiber* disease* or MERRF).tw,kf.                                                               | 711    |
| 11 | ((Lafora or Unverricht or Landau-Kleffner or Lennox Gastaut) adj2 (disease* or syndrome* or disorder* or seizure*)).tw,kf.   | 3984   |
| 12 | or/4-11                                                                                                                      | 371364 |
| 13 | Machine learning/                                                                                                            | 49774  |
| 14 | Machine learning.tw,kf.                                                                                                      | 63858  |
| 15 | ((Deep or hierarchical) adj1 learning).tw,kf.                                                                                | 28566  |
| 16 | exp network learning/                                                                                                        | 886    |
| 17 | ((transfer* or representation* or network*) adj2 learning).tw,kf.                                                            | 8790   |
| 18 | exp artificial intelligence/                                                                                                 | 55153  |
| 19 | ((artificial or machine or computer or computational) adj2 intelligence).tw,kf.                                              | 23056  |
| 20 | exp algorithm/                                                                                                               | 465121 |
| 21 | algorithm*.tw,kf.                                                                                                            | 381089 |
| 22 | ((data or binary or multiclass or multilabel) adj2 classification).tw,kf.                                                    | 6087   |
| 23 | exp artificial neural network/                                                                                               | 62826  |
| 24 | ((artificial or computational or computer* or convolutional or connectionist or mathematical) adj2 neur* network*).tw,kf.    | 33889  |
| 25 | exp pattern recognition/ or exp automated pattern recognition/                                                               | 68427  |
| 26 | (Automat* adj2 pattern* adj2 recognition*).tw,kf.                                                                            | 199    |
| 27 | exp back propagation/                                                                                                        | 2553   |
| 28 | (Back* propagation* or backpropagation*).tw,kf.                                                                              | 5107   |
| 29 | exp Bayesian learning/                                                                                                       | 4303   |
| 30 | (Bayes* adj2 (theorem or learning or analysis or approach* or forecast* or method* or prediction*)).tw,kf.                   | 24116  |
| 31 | exp Feature detection/ or exp feature extraction/ or exp feature learning/ or exp feature ranking/ or exp feature selection/ | 31030  |

|    |                                                                                                                                |        |
|----|--------------------------------------------------------------------------------------------------------------------------------|--------|
| 32 | ((feature* or representation) adj2 (detecti* or extracti* or learning* or ranking* or selection*)).tw,kf.                      | 28097  |
| 33 | exp fuzzy system/                                                                                                              | 4077   |
| 34 | (fuzzy or neurofuzzy).tw,kf.                                                                                                   | 16138  |
| 35 | exp Markov chain/ or exp Markov state model/                                                                                   | 12093  |
| 36 | (Markov adj2 (model* or chain\$1 or process*)).tw,kf.                                                                          | 29000  |
| 37 | exp k nearest neighbor/                                                                                                        | 4553   |
| 38 | K nearest neighbor*.tw,kf.                                                                                                     | 4260   |
| 39 | kernel method/                                                                                                                 | 6720   |
| 40 | (Kernel\$1 adj2 (method* or algorithm* or approach or correlation or estim* or regression or model* or string or tree)).tw,kf. | 4389   |
| 41 | exp Knowledge discovery/                                                                                                       | 727    |
| 42 | (Knowledge adj2 discover*).tw,kf.                                                                                              | 1804   |
| 43 | exp multifactor dimensionality reduction/                                                                                      | 864    |
| 44 | Dimension* reduction*.tw,kf.                                                                                                   | 7086   |
| 45 | (predicti* adj2 model*).tw,kf.                                                                                                 | 105404 |
| 46 | connectom*.tw,kf.                                                                                                              | 6225   |
| 47 | neur* decod*.tw,kf.                                                                                                            | 433    |
| 48 | exp Outlier detection/                                                                                                         | 470    |
| 49 | (outlier* adj2 detection*).tw,kf.                                                                                              | 1010   |
| 50 | exp artificial neural network/                                                                                                 | 62826  |
| 51 | exp Perceptron/                                                                                                                | 2478   |
| 52 | perceptron*.tw,kf.                                                                                                             | 3962   |
| 53 | (neural adj2 network*).tw,kf.                                                                                                  | 84786  |
| 54 | exp radial basis function/                                                                                                     | 942    |
| 55 | radial bas* function*.tw,kf.                                                                                                   | 2927   |
| 56 | exp random forest/                                                                                                             | 14358  |
| 57 | (random adj2 forest*).tw,kf.                                                                                                   | 17752  |

|    |                                                                                                        |        |
|----|--------------------------------------------------------------------------------------------------------|--------|
| 58 | exp recursive feature elimination/                                                                     | 393    |
| 59 | recursive feature* elimination*.tw,kf.                                                                 | 860    |
| 60 | exp recursive partitioning/                                                                            | 462    |
| 61 | recursive partition*.tw,kf.                                                                            | 3567   |
| 62 | exp relevance vector machine/ or exp support vector machine/                                           | 28522  |
| 63 | (vector* adj2 (machine* or classifi* or network* or regression)).tw,kf.                                | 27021  |
| 64 | support vector*.tw,kf.                                                                                 | 26266  |
| 65 | exp rough set/                                                                                         | 248    |
| 66 | rough set*.tw,kf.                                                                                      | 531    |
| 67 | exp online analytical processing/                                                                      | 187    |
| 68 | ((automat* or electron* or comput* or information or analytic*) adj2 (processing or reasoning)).tw,kf. | 44254  |
| 69 | Quantitative analysis/                                                                                 | 367570 |
| 70 | (quantitative adj2 analys*).tw,kf.                                                                     | 113093 |
| 71 | (Peak* adj2 (alpha* or frequenc*)).tw,kf.                                                              | 6315   |
| 72 | Entrop*.tw,kf.                                                                                         | 43483  |
| 73 | Lyapunov exponent*.tw,kf.                                                                              | 1600   |
| 74 | Hjorth*.tw,kf.                                                                                         | 264    |
| 75 | Sub-band energ*.tw,kf.                                                                                 | 23     |
| 76 | exp Fourier analysis/                                                                                  | 10056  |
| 77 | (Fourier* or (cyclic adj2 (analys* or series or transform* or approach*)) or FFT).tw,kf.               | 89584  |
| 78 | Hilbert transform/                                                                                     | 183    |
| 79 | (Hilbert* adj2 transform*).tw,kf.                                                                      | 1253   |
| 80 | (dimension* adj2 (fractal* or correlation*)).tw,kf.                                                    | 8947   |
| 81 | (Hurst adj2 exponent*).tw,kf.                                                                          | 555    |
| 82 | exp wavelet transform/                                                                                 | 2217   |
| 83 | (Wavelet* adj2 (analysis or processing or transform*)).tw,kf.                                          | 9182   |

|     |                                                                                                                                                                                                                                                                                             |          |
|-----|---------------------------------------------------------------------------------------------------------------------------------------------------------------------------------------------------------------------------------------------------------------------------------------------|----------|
| 84  | phase locking value*.tw,kf.                                                                                                                                                                                                                                                                 | 425      |
| 85  | Fisher information*.tw,kf.                                                                                                                                                                                                                                                                  | 746      |
| 86  | Dynamic network*.tw,kf.                                                                                                                                                                                                                                                                     | 1972     |
| 87  | Principal component* analys*.tw,kf.                                                                                                                                                                                                                                                         | 58526    |
| 88  | Independent component* analys*.tw,kf.                                                                                                                                                                                                                                                       | 7493     |
| 89  | Functional connectivity/                                                                                                                                                                                                                                                                    | 21903    |
| 90  | Functional connectivit*.tw,kf.                                                                                                                                                                                                                                                              | 30389    |
| 91  | (gradient* boost* or Adaboost*).tw,kf.                                                                                                                                                                                                                                                      | 4097     |
| 92  | (QEEG or Quantitative Electroencephalogra*).tw,kf.                                                                                                                                                                                                                                          | 2861     |
| 93  | (chaotic feature* or chaos).tw,kf.                                                                                                                                                                                                                                                          | 8412     |
| 94  | comput*.tw,kf.                                                                                                                                                                                                                                                                              | 1156500  |
| 95  | quantitative.tw,kf.                                                                                                                                                                                                                                                                         | 852081   |
| 96  | or/13-95                                                                                                                                                                                                                                                                                    | 2994032  |
| 97  | (sensitiv* or diagnos* or predict*).mp. or scor*.tw. or observ*.mp.                                                                                                                                                                                                                         | 14413096 |
| 98  | di.fs.                                                                                                                                                                                                                                                                                      | 3343316  |
| 99  | or/97-98                                                                                                                                                                                                                                                                                    | 14413096 |
| 100 | 3 and 12 and 96 and 99                                                                                                                                                                                                                                                                      | 8362     |
| 101 | (exp animal/ or animal experiment/ or nonhuman/) not (exp human/ or human experiment/)                                                                                                                                                                                                      | 6801969  |
| 102 | (animal or animals or canine* or dog or dogs or feline or hamster* or lamb or lambs or mice or monkey ormonkeys or mouse or murine or pig or pigs or piglet* or porcine or primate* or rabbit* or rats or rat or rodent* or sheep* or veterinar*).ti,kw,dq,jx. not (human* or patient*).mp. | 2062187  |
| 103 | 101 or 102                                                                                                                                                                                                                                                                                  | 6872024  |
| 104 | 100 not 103                                                                                                                                                                                                                                                                                 | 7906     |
| 105 | limit 104 to yr="1961 -Current"                                                                                                                                                                                                                                                             | 7890     |
| 106 | limit 105 to embase                                                                                                                                                                                                                                                                         | 5134     |

**EBM Reviews [OVID]**

All EBM Reviews - Cochrane DSR, ACP Journal Club, DARE, CCA, CCTR, CMR, HTA, and NHSEED  
<executed on December 14>

| #  | Searches                                                                                                                      | Results |
|----|-------------------------------------------------------------------------------------------------------------------------------|---------|
| 1  | (EEG* or Electroencephalograph* or "electr* encephalograph*" or "brain wave*").tw,kw,sh.                                      | 12245   |
| 2  | Epilep*.tw,kw,sh.                                                                                                             | 10099   |
| 3  | (seizure* or convulsion* or infantile spasm*).tw,kw,sh.                                                                       | 11675   |
| 4  | (BCECTS or BECTS).tw,kw,sh.                                                                                                   | 31      |
| 5  | (panayiotopoulos adj2 syndrome*).tw,kw,sh.                                                                                    | 5       |
| 6  | ((Nodding or dravet or doose or may white or fukhura) adj2 (disease* or syndrome*)).tw,kw,sh.                                 | 413     |
| 7  | (myoencephalopathy ragged red fiber* disease* or MERRF).tw,kw,sh.                                                             | 5       |
| 8  | ((Lafora or Unverricht or Landau-Kleffner or Lennox Gastaut) adj2 (disease* or syndrome* or disorder* or seizure*)).tw,kw,sh. | 339     |
| 9  | or/2-8                                                                                                                        | 16595   |
| 10 | algorithm*.tw,kw.                                                                                                             | 16401   |
| 11 | Machine learning.tw,kw,sh.                                                                                                    | 1918    |
| 12 | ((Deep or hierarchical) adj1 learning).tw,kw,sh.                                                                              | 708     |
| 13 | ((transfer* or representation* or network*) adj2 learning).tw,kw,sh.                                                          | 691     |
| 14 | ((artificial or machine or computer or computational) adj2 intelligence).tw,kw,sh.                                            | 827     |
| 15 | algorithm*.tw,kw,sh.                                                                                                          | 18549   |
| 16 | ((data or binary or multiclass or multilabel) adj2 classification).tw,kw,sh.                                                  | 335     |
| 17 | ((artificial or computational or computer* or connectionist or convolutional or mathematical) adj2 neur* network*).tw,kw,sh.  | 782     |
| 18 | (Automat* adj2 pattern* adj2 recognition*).tw,kw,sh.                                                                          | 15      |
| 19 | (Back* propagation* or backpropagation*).tw,kw,sh.                                                                            | 66      |
| 20 | (Bayes* adj2 (theorem or learning or analysis or approach* or forecast* or method* or prediction*)).tw,kw,sh.                 | 1841    |
| 21 | (feature* adj2 (detecti* or extracti* or learning* or ranking* or selection*)).tw,kw,sh.                                      | 607     |

|    |                                                                                                                                   |      |
|----|-----------------------------------------------------------------------------------------------------------------------------------|------|
| 22 | (fuzzy or neurofuzzy).tw,kw,sh.                                                                                                   | 197  |
| 23 | (Markov adj2 (model* or chain\$1 or process*)).tw,kw,sh.                                                                          | 4373 |
| 24 | K nearest neighbor*.tw,kw,sh.                                                                                                     | 73   |
| 25 | (Kernel\$1 adj2 (method* or algorithm* or approach or correlation or estim* or regression or model* or string or tree)).tw,kw,sh. | 90   |
| 26 | (Knowledge adj2 discover*).tw,kw,sh.                                                                                              | 26   |
| 27 | Dimensionality reduction*.tw,kw,sh.                                                                                               | 73   |
| 28 | (predicti* adj2 model*).tw,kw,sh.                                                                                                 | 5378 |
| 29 | connectom*.tw,kw,sh.                                                                                                              | 308  |
| 30 | neur* decod*.tw,kw,sh.                                                                                                            | 2    |
| 31 | (outlier* adj2 detection*).tw,kw,sh.                                                                                              | 14   |
| 32 | perceptron*.tw,kw,sh.                                                                                                             | 76   |
| 33 | (neural adj2 network*).tw,kw,sh.                                                                                                  | 1672 |
| 34 | radial basis function*.tw,kw,sh.                                                                                                  | 39   |
| 35 | random forest*.tw,kw,sh.                                                                                                          | 615  |
| 36 | recursive feature* elimination*.tw,kw,sh.                                                                                         | 30   |
| 37 | recursive partition*.tw,kw,sh.                                                                                                    | 282  |
| 38 | (vector* adj2 (machine* or classifi* or network* or regression)).tw,kw,sh.                                                        | 555  |
| 39 | support vector*.tw,kw,sh.                                                                                                         | 544  |
| 40 | rough set*.tw,kw,sh.                                                                                                              | 3    |
| 41 | ((automat* or electron* or comput* or information or analytic*) adj2 (processing or reasoning)).tw,kw,sh.                         | 7510 |
| 42 | (quantitative adj2 analys*).tw,kw,sh.                                                                                             | 8960 |
| 43 | (Peak* adj2 (alpha* or frequenc*)).tw,kw,sh.                                                                                      | 357  |
| 44 | Entrop*.tw,kw,sh.                                                                                                                 | 951  |
| 45 | Lyapunov exponent*.tw,kw,sh.                                                                                                      | 37   |
| 46 | Hjorth*.tw,kw,sh.                                                                                                                 | 29   |
| 47 | Sub-band energ*.tw,kw,sh.                                                                                                         | 0    |

|    |                                                                                                                                                                                                                                                                                                                        |        |
|----|------------------------------------------------------------------------------------------------------------------------------------------------------------------------------------------------------------------------------------------------------------------------------------------------------------------------|--------|
| 48 | (Fourier* or (cyclic adj2 (analys* or series or transform* or approach*)) or FFT).tw,kw,sh.                                                                                                                                                                                                                            | 1043   |
| 49 | (Hilbert* adj2 transform*).tw,kw,sh.                                                                                                                                                                                                                                                                                   | 19     |
| 50 | (dimension* adj2 (fractal* or correlation*)).tw,kw,sh.                                                                                                                                                                                                                                                                 | 184    |
| 51 | (Hurst adj2 exponent*).tw,kw,sh.                                                                                                                                                                                                                                                                                       | 14     |
| 52 | (Wavelet* adj2 (analysis or processing or transform*)).tw,kw,sh.                                                                                                                                                                                                                                                       | 126    |
| 53 | phase locking value*.tw,kw,sh.                                                                                                                                                                                                                                                                                         | 11     |
| 54 | Fisher information*.tw,kw,sh.                                                                                                                                                                                                                                                                                          | 7      |
| 55 | Dynamic network*.tw,kw,sh.                                                                                                                                                                                                                                                                                             | 12     |
| 56 | Principal component* analys*.tw,kw,sh.                                                                                                                                                                                                                                                                                 | 1207   |
| 57 | Indepandant component* analys*.tw,kw,sh.                                                                                                                                                                                                                                                                               | 0      |
| 58 | Functional connectivit*.tw,kw,sh.                                                                                                                                                                                                                                                                                      | 2220   |
| 59 | (gradient* boost* or Adaboost*).tw,kw,sh.                                                                                                                                                                                                                                                                              | 168    |
| 60 | (QEEG or Quantitative Electroencephalogra*).tw,kw,sh.                                                                                                                                                                                                                                                                  | 448    |
| 61 | (chaotic feature* or chaos).tw,kw,sh.                                                                                                                                                                                                                                                                                  | 141    |
| 62 | comput*.tw,kw,sh.                                                                                                                                                                                                                                                                                                      | 80820  |
| 63 | quantitative.tw,kw,sh.                                                                                                                                                                                                                                                                                                 | 33706  |
| 64 | or/10-63                                                                                                                                                                                                                                                                                                               | 145496 |
| 65 | (sensitiv* or diagnos* or predict*).mp. or scor*.tw. or observ*.mp.                                                                                                                                                                                                                                                    | 810011 |
| 66 | di.tw,kw,sh.                                                                                                                                                                                                                                                                                                           | 17162  |
| 67 | 65 or 66                                                                                                                                                                                                                                                                                                               | 811399 |
| 68 | 1 and 9 and 64 and 67                                                                                                                                                                                                                                                                                                  | 350    |
| 69 | ((animal or animals or canine* or cat or cats or dog or dogs or feline or hamster* or lamb or lambs or mice or monkey or monkeys or mouse or murine or pig or pigs or piglet* or porcine or primate* or rabbit* or rats or rat or rodent* or sheep* or veterinar*) not (human* or patient* or women or men)).tw,kw,sh. | 5147   |
| 70 | 68 not 69                                                                                                                                                                                                                                                                                                              | 346    |
| 71 | limit 70 to yr="1961 -Current" [Limit not valid in DARE; records were retained]                                                                                                                                                                                                                                        | 321    |
| 72 | remove duplicates from 71                                                                                                                                                                                                                                                                                              | 315    |

## IEEE Xplore

<executed on December 14>

|                                                                                                                                                                                                                                                                                                                                                                                                                                                                                                                                                                                                                                                                                                                                                                                                                                                                                                                                                                                                                                                                                                                                                                                                                                                                                                                                                                                                                                                                                                                                                                                         |      |
|-----------------------------------------------------------------------------------------------------------------------------------------------------------------------------------------------------------------------------------------------------------------------------------------------------------------------------------------------------------------------------------------------------------------------------------------------------------------------------------------------------------------------------------------------------------------------------------------------------------------------------------------------------------------------------------------------------------------------------------------------------------------------------------------------------------------------------------------------------------------------------------------------------------------------------------------------------------------------------------------------------------------------------------------------------------------------------------------------------------------------------------------------------------------------------------------------------------------------------------------------------------------------------------------------------------------------------------------------------------------------------------------------------------------------------------------------------------------------------------------------------------------------------------------------------------------------------------------|------|
| <pre> ((((((((All Metadata:predicted OR All Metadata:prediction OR All Metadata:predictions OR All Metadata:predicting OR All Metadata:predictive OR All Metadata:predictor OR All Metadata:predictors OR All Metadata:predicts OR All Metadata:predictability OR All Metadata:predictable OR All Metadata:predictably OR All Metadata:predictively OR All Metadata:predictiveness))) OR ((All Metadata:sensitivity OR All Metadata:sensitively OR All Metadata:sensitiveness OR All Metadata:sensitive OR All Metadata:sensitivities))) OR ((All Metadata:diagnose OR All Metadata:diagnosis OR All Metadata:diagnosed OR All Metadata:diagnoses OR All Metadata:diagnostic OR All Metadata:diagnosing OR All Metadata:diagnosable OR All Metadata:diagnostics OR All Metadata:diagnoseable OR All Metadata:diagnostical OR All Metadata:diagnostician OR All Metadata:diagnosticians OR All Metadata:diagnostically))) AND ((No Keywords Specified))) AND ((No Keywords Specified))) AND ((Index Terms:EEG ) OR (Index Terms:Electroencephalograph*) OR (Index Terms: "electr* encephalograph*") OR (Index Terms: "brain wave") OR (Index Terms:"brain waves"))) OR ((Document Title:EEG) OR (Document Title:Electroencephalograph*) OR (Document Title:"electr* encephalograph*") OR (Document Title:"brain wave") OR (Document Title:"brain waves"))) AND ((Index Terms:epilep*) OR (Document Title:seizure OR Document Title:seizures OR Document Title:convulsion OR Document Title:convulsions OR Document Title:"infantile spasm" OR Document Title:"infantile spasms")) </pre> | 2492 |
|-----------------------------------------------------------------------------------------------------------------------------------------------------------------------------------------------------------------------------------------------------------------------------------------------------------------------------------------------------------------------------------------------------------------------------------------------------------------------------------------------------------------------------------------------------------------------------------------------------------------------------------------------------------------------------------------------------------------------------------------------------------------------------------------------------------------------------------------------------------------------------------------------------------------------------------------------------------------------------------------------------------------------------------------------------------------------------------------------------------------------------------------------------------------------------------------------------------------------------------------------------------------------------------------------------------------------------------------------------------------------------------------------------------------------------------------------------------------------------------------------------------------------------------------------------------------------------------------|------|

## Google Scholar (using Publish or Perish)

<executed on December 21>

|                                                                                             |                                   |
|---------------------------------------------------------------------------------------------|-----------------------------------|
| Electroencephalogram epilepsy [title], machine learning algorithm*<br>diagnos* [keywords]   | 32 selected articles out of<br>32 |
| Electroencephalography epilepsy [title], machine learning algorithm*<br>diagnos* [keywords] | 21 selected article out of 21     |
| EEG epilepsy [title], machine learning algorithm*<br>diagnos* [keywords]                    | 433 sur 433                       |

## Grey literature

### Alberta: Health evidence reviews

<https://www.alberta.ca/health-evidence-reviews.aspx>

|                        |                              |
|------------------------|------------------------------|
| Electroencephalography | 0 selected articles out of 1 |
| EEG                    | 0 selected articles out of 3 |

### Canadian Agency for Drug and Technologies in Health

<https://www.cadth.ca/search?keywords>

|                        |                              |
|------------------------|------------------------------|
| Electroencephalography | 0 selected articles out of 1 |
| EEG                    | 0 selected articles out of 4 |

### Health Quality Council of Alberta

<https://hqca.ca/studies-and-reviews/>

|                        |                              |
|------------------------|------------------------------|
| Electroencephalography | 0 selected articles out of 0 |
| EEG                    | 0 selected articles out of 0 |

### Health Quality Ontario: Health Technology Assessment

Quality Standards - Health Quality Ontario (HQO) ([hqontario.ca](http://hqontario.ca))

|                        |                             |
|------------------------|-----------------------------|
| Electroencephalography | 1 selected article out of 7 |
| EEG                    | 1 selected article out of 5 |

### INESS

[https://www.inesss.qc.ca/en/publications/publications.html?tx\\_solr%5Bq%5D=EEG](https://www.inesss.qc.ca/en/publications/publications.html?tx_solr%5Bq%5D=EEG)

|                         |                              |
|-------------------------|------------------------------|
| électroencéphalographie | 0 selected articles out of 5 |
| EEG                     | 0 selected articles out of 0 |

### McGill University Health Centre (MUHC). Technology Assessment Unit Reports

<https://muhc.ca/tau/page/tau-reports>

|                        |                              |
|------------------------|------------------------------|
| Electroencephalography | 0 selected article out of 0  |
| EEG                    | 0 selected articles out of 3 |

### Newfoundland & Labrador Centre For Applied Health Research

<http://www.nlcahr.mun.ca/CHRSP/CompletedCHRSP.php>

|                                     |                               |
|-------------------------------------|-------------------------------|
| Electroencephalography AND epilepsy | 0 selected articles out of 37 |
| Electroencephalogram AND epilepsy   | 0 selected articles out of 34 |
| EEG AND epilepsy                    | 0 selected articles out of 28 |

### The Ottawa Hospital Research institute: Knowledge Synthesis Group

<http://www.ohri.ca/ksgroup/>

|                        |                              |
|------------------------|------------------------------|
| Electroencephalography | 0 selected articles out of 0 |
| Electroencephalogram   | 0 selected articles out of 0 |
| EEG AND epilepsy       | 0 selected articles out of 7 |

### Programs for Assessment of Technology in Health

<https://www.path-hta.com/research-1>

|                        |                              |
|------------------------|------------------------------|
| Electroencephalography | 0 selected articles out of 0 |
| Electroencephalogram   | 0 selected articles out of 0 |
| EEG                    | 0 selected articles out of 0 |

### The International Network of Agencies for Health Technology Assessment

#### Publications - INAHTA

|                        |                              |
|------------------------|------------------------------|
| Electroencephalography | 0 selected articles out of 1 |
| Electroencephalogram   | 0 selected articles out of 4 |
| EEG                    | 0 selected articles out of 4 |

### Horizon Scanning

#### Horizon Scanning - Australia and New Zealand Horizon Scanning Network - Technologies Assessed

|                        |                              |
|------------------------|------------------------------|
| Electroencephalography | 0 selected articles out of 1 |
| Electroencephalogram   | 0 selected articles out of 0 |
| EEG                    | 0 selected articles out of 0 |

### Austrian Academy of Sciences

<https://www.oeaw.ac.at/en/>

|                        |                              |
|------------------------|------------------------------|
| Electroencephalography | 0 selected articles out of 0 |
| Electroencephalogram   | 0 selected articles out of 0 |
| EEG                    | 0 selected articles out of 2 |

### Austrian Institute Of Health Technology Assessment

Welcome to Repository of AIHTA GmbH - Repository of AIHTA GmbH (lbg.ac.at)

|                        |                              |
|------------------------|------------------------------|
| Electroencephalography | 0 selected articles out of 4 |
| Electroencephalogram   | 0 selected articles out of 0 |

|     |                              |
|-----|------------------------------|
| EEG | 0 selected articles out of 2 |
|-----|------------------------------|

### KCE: Belgian health Knowledge Center

All reports - KCE (fgov.be)

|                         |                              |
|-------------------------|------------------------------|
| Electroencephalography  | 0 selected articles out of 1 |
| Electroencephalogram    | 0 selected articles out of 0 |
| EEG                     | 0 selected articles out of 1 |
| électroencéphalographie | 0 selected article out of 1  |

### CEDIT, the Hospital-Based HTA Agency Of AP-HP

Recommendations and Reports | Cedit (aphp.fr)

|                         |                              |
|-------------------------|------------------------------|
| Electroencephalography  | 0 selected articles out of 0 |
| Electroencephalogram    | 0 selected articles out of 0 |
| EEG                     | 0 selected articles out of 1 |
| électroencéphalographie | 0 selected article out of 0  |

### Haute Autorité de Santé

Haute Autorité de Santé - Résultat de recherche (has-sante.fr)

|                         |                               |
|-------------------------|-------------------------------|
| EEG                     | 1 selected article out of 218 |
| électroencéphalographie | 0 selected article out of 27  |

### Health Information and Quality Authority

Health Technology Assessments | HIQA

|                        |                              |
|------------------------|------------------------------|
| Electroencephalography | 0 selected articles out of 0 |
| Electroencephalogram   | 0 selected articles out of 0 |
| EEG                    | 0 selected articles out of 0 |

### Irish Health Repository

Lenus the Irish Health Repository

|                                            |                               |
|--------------------------------------------|-------------------------------|
| Title: Electroencephalography AND epilepsy | 1 selected article out of 51  |
| Electroencephalogram                       | 0 selected articles out of 3  |
| Title: EEG AND epilepsy                    | 0 selected articles out of 51 |

### Norwegian Institute of Public Health

**Norwegian Institute of Public Health - NIPH (fhi.no)**

|                        |                              |
|------------------------|------------------------------|
| Electroencephalography | 0 selected articles out of 0 |
| Electroencephalogram   | 0 selected articles out of 0 |
| EEG                    | 0 selected articles out of 3 |

**Swedish Agency for Health Technology Assessment And Assessment Of Social Services****Home (sbu.se)**

|                        |                              |
|------------------------|------------------------------|
| Electroencephalography | 0 selected articles out of 2 |
| Electroencephalogram   | 0 selected articles out of 2 |
| EEG                    | 0 selected articles out of 4 |

**Healthcare Improvement Scotland****Healthcare Improvement Scotland**

|                        |                              |
|------------------------|------------------------------|
| Electroencephalography | 0 selected articles out of 0 |
| Electroencephalogram   | 0 selected articles out of 0 |
| EEG                    | 0 selected articles out of 0 |

**National Institute for Health and Care Excellence****NICE | The National Institute for Health and Care Excellence**

|                                     |                              |
|-------------------------------------|------------------------------|
| electroencephalography AND epilepsy | 0 selected articles out of 2 |
| Electroencephalogram AND epilepsy   | 1 selected article out of 5  |
| EEG                                 | 0 selected articles out of 9 |

**NIHR Innovation Observatory****Innovation Observatory | Next generation search tools for the next generation. (nihr.ac.uk)**

|                        |                              |
|------------------------|------------------------------|
| Electroencephalography | 1 selected article out of 2  |
| Electroencephalogram   | 0 selected articles out of 1 |
| EEG                    | 0 selected articles out of 5 |

**National institute for health Research****Research Programmes (nihr.ac.uk)**

|                                     |                               |
|-------------------------------------|-------------------------------|
| electroencephalography AND epilepsy | 1 selected article out of 67  |
| Electroencephalogram AND epilepsy   | 0 selected articles out of 67 |
| EEG                                 | 0 selected articles out of 67 |

**Agency for Healthcare Research and Quality : Technology Assessment Program****Technology Assessment Program | Agency for Healthcare Research and Quality (ahrq.gov)**

|                                                   |                               |
|---------------------------------------------------|-------------------------------|
| Electroencephalography AND epilepsy AND diagnosis | 0 selected articles out of 1  |
| Electroencephalogram AND epilepsy AND diagnosis   | 0 selected articles out of 78 |
| EEG AND epilepsy AND diagnosis                    | 0 selected articles out of 83 |

**Agency for Healthcare Research and Quality : Evidence-Based Reports****Search Evidence-Based Reports | Agency for Healthcare Research and Quality (ahrq.gov)**

|                        |                              |
|------------------------|------------------------------|
| Electroencephalography | 0 selected articles out of 0 |
| Electroencephalogram   | 0 selected articles out of 0 |
| EEG AND epilepsy       | 0 selected articles out of 4 |

**Google**

|                                                                                 |                              |
|---------------------------------------------------------------------------------|------------------------------|
| intitle: Electroencephalography AND epilepsy AND machine learning AND diagnosis | 3 selected articles out of 9 |
| intitle: Electroencephalogram AND epilepsy AND machine learning AND diagnosis   | 0 selected articles out of 9 |
| intitle: EEG AND epilepsy AND machine learning AND diagnosis                    | 1 selected articles out of 9 |
| intitle: Electroencephalography AND epilepsy AND algorithm AND diagnosis        | 0 selected articles out of 9 |
| intitle: Electroencephalogram AND epilepsy AND algorithm AND diagnosis          | 0 selected articles out of 9 |
| intitle: EEG AND epilepsy AND algorithm AND diagnosis                           | 0 selected articles out of 9 |
